# Supplementary material for: Public awareness of seafood mislabeling
Source: PeerJ. 2022 Jun 28;10:e13486. doi: 10.7717/peerj.13486 (PMC9248779; doi:10.7717/peerj.13486)
Supplement: Supplemental Information 2 [file peerj-10-13486-s002.xlsx]

## Sheet: Sheet1
Start Date	End Date	Progress	Duration (in seconds)	Finished	Recorded Date	User Language	How often do you consume seafood?	Where do you typically purchase your seafood? (check all that apply)	How familiar are you with seafood mislabeling or seafood fraud?	How concerned are you about seafood mislabeling?	Health	Social justice issues	Environmental concerns	Economic	How likely would you be to preferentially purchase seafood from a restaurant or retailer where the labeling was independently verified?	Are you a student?	What is your year of birth?	List of Countries	50 States, D.C. and Puerto Rico
2019-10-10 12:27:00	2019-10-10 12:29:00	100	114	TRUE	2019-10-10 12:29:00	EN	Sometimes (once or twice a month)	Grocery store	Very familiar	Extremely concerned	Extremely concerned	Extremely concerned	Extremely concerned	Extremely concerned	Extremely likely	No	1985	United States of America	North Carolina
2019-10-10 12:24:00	2019-10-10 12:31:00	100	428	TRUE	2019-10-10 12:31:00	EN	Sometimes (once or twice a month)	Restaurant	Never heard of it	Extremely concerned	Extremely concerned	Extremely concerned	Extremely concerned	Extremely concerned	Extremely likely	Yes	1776	Switzerland	North Dakota
2019-10-10 12:40:00	2019-10-10 12:41:00	100	63	TRUE	2019-10-10 12:41:00	EN	Sometimes (once or twice a month)	Grocery store,Restaurant	Vaguely familiar	Extremely concerned	Extremely concerned	Very concerned	Very concerned	Extremely concerned	Neither likely nor unlikely	Yes	1997	Cuba	North Carolina
2019-10-10 12:44:00	2019-10-10 12:49:00	100	301	TRUE	2019-10-10 12:49:00	EN	Often (once a week)	Seafood market,Grocery store	Vaguely familiar	Extremely concerned	Extremely concerned	Extremely concerned	Extremely concerned	Extremely concerned	Extremely likely	No	1968	United States of America	Florida
2019-10-10 12:56:00	2019-10-10 12:59:00	100	131	TRUE	2019-10-10 12:59:00	EN	Often (once a week)	Other	Vaguely familiar	Extremely concerned	Not at all concerned	Extremely concerned	Not at all concerned	Extremely concerned	Extremely likely	Yes	2000-11-01	United States of America	North Carolina
2019-10-10 12:56:00	2019-10-10 12:59:00	100	167	TRUE	2019-10-10 12:59:00	EN	Often (once a week)	Grocery store	Vaguely familiar	Extremely concerned	Extremely concerned	Moderately concerned	Very concerned	Extremely concerned	Extremely likely	No	1979	United States of America	North Carolina
2019-10-10 13:15:00	2019-10-10 13:20:00	100	327	TRUE	2019-10-10 13:20:00	EN	Sometimes (once or twice a month)	Other	Very familiar	Extremely concerned	Extremely concerned	Extremely concerned	Extremely concerned	Extremely concerned	Neither likely nor unlikely	No	1962	United States of America	Minnesota
2019-10-10 13:23:00	2019-10-10 13:25:00	100	79	TRUE	2019-10-10 13:25:00	EN	Sometimes (once or twice a month)	Seafood market,Restaurant	Vaguely familiar	Extremely concerned	Very concerned	Extremely concerned	Extremely concerned	Moderately concerned	Somewhat unlikely	Yes	2001	United States of America	North Carolina
2019-10-10 13:11:00	2019-10-10 13:26:00	100	864	TRUE	2019-10-10 13:26:00	EN	Sometimes (once or twice a month)	Seafood market	Vaguely familiar	Extremely concerned	Extremely concerned	Extremely concerned	Extremely concerned	Very concerned	Extremely unlikely	Yes	1976	C√¥te d'Ivoire
2019-10-10 13:36:00	2019-10-10 13:36:00	100	54	TRUE	2019-10-10 13:36:00	EN	Seldom (once or twice a year)	Seafood market	Very familiar	Extremely concerned	Not at all concerned	Extremely concerned	Extremely concerned	Not at all concerned	Extremely likely	No	1989	United States of America	North Carolina
2019-10-10 13:41:00	2019-10-10 13:45:00	100	226	TRUE	2019-10-10 13:45:00	EN	Sometimes (once or twice a month)	Grocery store	Never heard of it	Extremely concerned	Extremely concerned	Extremely concerned	Extremely concerned	Extremely concerned	Extremely likely	Yes	1994-03-13	United States of America	North Carolina
2019-10-10 13:48:00	2019-10-10 13:49:00	100	88	TRUE	2019-10-10 13:49:00	EN	Often (once a week)	Grocery store	Very familiar	Extremely concerned	Very concerned	Extremely concerned	Extremely concerned	Extremely concerned	Somewhat likely	Yes	1997	United States of America	North Carolina
2019-10-10 13:50:00	2019-10-10 13:52:00	100	102	TRUE	2019-10-10 13:52:00	EN	Seldom (once or twice a year)	Restaurant	Never heard of it	Extremely concerned	Extremely concerned	Moderately concerned	Moderately concerned	Very concerned	Somewhat likely	Yes	2000	United States of America	North Carolina
2019-10-10 13:54:00	2019-10-10 13:56:00	100	103	TRUE	2019-10-10 13:56:00	EN	Sometimes (once or twice a month)	Grocery store	Vaguely familiar	Extremely concerned	Extremely concerned	Extremely concerned	Extremely concerned	Extremely concerned	Extremely likely	Yes	1998	United States of America	North Carolina
2019-10-10 14:01:00	2019-10-10 14:03:00	100	160	TRUE	2019-10-10 14:03:00	EN	Sometimes (once or twice a month)	Grocery store	Never heard of it	Extremely concerned	Extremely concerned	Very concerned	Extremely concerned	Moderately concerned	Extremely likely	Yes	2001	United States of America	North Carolina
2019-10-10 14:01:00	2019-10-10 14:04:00	100	161	TRUE	2019-10-10 14:04:00	EN	Sometimes (once or twice a month)	Grocery store,Restaurant	Very familiar	Extremely concerned	Extremely concerned	Extremely concerned	Extremely concerned	Extremely concerned	Somewhat likely	Yes	2001	United States of America	North Carolina
2019-10-10 14:06:00	2019-10-10 14:08:00	100	127	TRUE	2019-10-10 14:08:00	EN	Sometimes (once or twice a month)	Grocery store	Never heard of it	Extremely concerned	Extremely concerned	Very concerned	Very concerned	Extremely concerned	Extremely likely	No	1999	United States of America	North Carolina
2019-10-10 14:09:00	2019-10-10 14:13:00	100	254	TRUE	2019-10-10 14:13:00	EN	Often (once a week)	Grocery store,Restaurant	Vaguely familiar	Extremely concerned	Very concerned	Very concerned	Very concerned	Very concerned	Neither likely nor unlikely	No	1959	United States of America	Alabama
2019-10-10 14:12:00	2019-10-10 14:14:00	100	142	TRUE	2019-10-10 14:14:00	EN	Sometimes (once or twice a month)	Grocery store	Very familiar	Extremely concerned	Slightly concerned	Moderately concerned	Very concerned	Moderately concerned	Somewhat likely	No	1990	C√¥te d'Ivoire	I do not reside in the United States
2019-10-10 14:15:00	2019-10-10 14:16:00	100	105	TRUE	2019-10-10 14:16:00	EN	Often (once a week)	Grocery store	Very familiar	Extremely concerned	Extremely concerned	Very concerned	Extremely concerned	Moderately concerned	Extremely likely	No	1966	United States of America	Minnesota
2019-10-10 14:18:00	2019-10-10 14:20:00	100	119	TRUE	2019-10-10 14:20:00	EN	Sometimes (once or twice a month)	Grocery store	Never heard of it	Extremely concerned	Moderately concerned	Not at all concerned	Moderately concerned	Extremely concerned	Extremely likely	Yes	1997	United States of America	South Carolina
2019-10-10 14:18:00	2019-10-10 14:20:00	100	171	TRUE	2019-10-10 14:21:00	EN	Sometimes (once or twice a month)	Restaurant	Never heard of it	Extremely concerned	Very concerned	Very concerned	Very concerned	Moderately concerned	Somewhat likely	Yes	1998	United States of America	North Carolina
2019-10-10 14:24:00	2019-10-10 14:26:00	100	133	TRUE	2019-10-10 14:26:00	EN	Often (once a week)	Seafood market	Very familiar	Extremely concerned	Very concerned	Very concerned	Very concerned	Very concerned	Extremely likely	No	1979	United States of America	North Carolina
2019-10-10 14:54:00	2019-10-10 14:55:00	100	81	TRUE	2019-10-10 14:55:00	EN	Never	I do not purchase seafood	Vaguely familiar	Extremely concerned	Extremely concerned	Extremely concerned	Extremely concerned	Extremely concerned	Extremely unlikely	Yes	2000	United States of America	Massachusetts
2019-10-10 15:12:00	2019-10-10 15:13:00	100	82	TRUE	2019-10-10 15:13:00	EN	Seldom (once or twice a year)	Restaurant	Very familiar	Extremely concerned	Extremely concerned	Not at all concerned	Not at all concerned	Extremely concerned	Extremely unlikely	Yes	2000	United States of America	North Carolina
2019-10-10 15:36:00	2019-10-10 15:38:00	100	116	TRUE	2019-10-10 15:38:00	EN	Seldom (once or twice a year)	Restaurant	Vaguely familiar	Extremely concerned	Extremely concerned	Extremely concerned	Extremely concerned	Extremely concerned	Neither likely nor unlikely	No	1999	United States of America	North Carolina
2019-10-10 15:40:00	2019-10-10 15:42:00	100	93	TRUE	2019-10-10 15:42:00	EN	Often (once a week)	I do not purchase seafood	Never heard of it	Extremely concerned	Extremely concerned	Very concerned	Extremely concerned	Very concerned	Extremely likely	Yes	2001	United States of America	North Carolina
2019-10-10 15:39:00	2019-10-10 15:43:00	100	204	TRUE	2019-10-10 15:43:00	EN	Often (once a week)	Seafood market,Grocery store,Other	Vaguely familiar	Extremely concerned	Extremely concerned	Extremely concerned	Extremely concerned	Extremely concerned	Neither likely nor unlikely	No	1953	United States of America	North Carolina
2019-10-10 16:15:00	2019-10-10 16:16:00	100	75	TRUE	2019-10-10 16:16:00	EN	Sometimes (once or twice a month)	Grocery store,Restaurant	Very familiar	Extremely concerned	Extremely concerned	Extremely concerned	Extremely concerned	Extremely concerned	Neither likely nor unlikely	No	1994	United States of America	Virginia
2019-10-10 17:02:00	2019-10-10 17:04:00	100	138	TRUE	2019-10-10 17:04:00	EN	Sometimes (once or twice a month)	Grocery store,Restaurant	Vaguely familiar	Extremely concerned	Extremely concerned	Moderately concerned	Very concerned	Very concerned	Extremely likely	Yes	2001	United States of America	North Carolina
2019-10-10 17:18:00	2019-10-10 17:20:00	100	144	TRUE	2019-10-10 17:20:00	EN	Often (once a week)	Grocery store	Never heard of it	Extremely concerned	Not at all concerned	Slightly concerned	Slightly concerned	Moderately concerned	Somewhat unlikely	No	1995	United States of America	North Carolina
2019-10-10 17:52:00	2019-10-10 17:57:00	100	263	TRUE	2019-10-10 17:57:00	EN	Sometimes (once or twice a month)	Grocery store	Very familiar	Extremely concerned	Extremely concerned	Extremely concerned	Extremely concerned	Extremely concerned	Somewhat likely	No	1978	United States of America	North Carolina
2019-10-10 18:09:00	2019-10-10 18:14:00	100	277	TRUE	2019-10-10 18:14:00	EN	Often (once a week)	Seafood market,Grocery store,Restaurant	Vaguely familiar	Extremely concerned	Extremely concerned	Extremely concerned	Extremely concerned	Extremely concerned	Extremely likely	No	1943	United States of America
2019-10-10 18:22:00	2019-10-10 18:24:00	100	101	TRUE	2019-10-10 18:24:00	EN	Seldom (once or twice a year)	Grocery store	Very familiar	Extremely concerned	Extremely concerned	Extremely concerned	Extremely concerned	Extremely concerned	Extremely likely	No	1973	United States of America	North Carolina
2019-10-10 18:47:00	2019-10-10 18:48:00	100	94	TRUE	2019-10-10 18:48:00	EN	Sometimes (once or twice a month)	Seafood market,Grocery store,Restaurant	Vaguely familiar	Extremely concerned	Extremely concerned	Very concerned	Extremely concerned	Very concerned	Extremely likely	Yes	1999	United States of America	North Carolina
2019-10-10 19:09:00	2019-10-10 19:12:00	100	161	TRUE	2019-10-10 19:12:00	EN	Often (once a week)	Grocery store,Other	Vaguely familiar	Extremely concerned	Very concerned	Extremely concerned	Extremely concerned	Extremely concerned	Extremely likely	No	1968	United States of America	North Carolina
2019-10-10 19:36:00	2019-10-10 19:40:00	100	194	TRUE	2019-10-10 19:40:00	EN	Often (once a week)	Grocery store	Very familiar	Extremely concerned	Very concerned	Very concerned	Extremely concerned	Moderately concerned	Extremely likely	No	1943	United States of America	North Carolina
2019-10-10 19:45:00	2019-10-10 19:47:00	100	106	TRUE	2019-10-10 19:47:00	EN	Very often (several times per week)	I do not purchase seafood	Very familiar	Extremely concerned	Not at all concerned	Not at all concerned	Not at all concerned	Not at all concerned	Extremely likely	Yes	1971	United Arab Emirates	I do not reside in the United States
2019-10-10 19:47:00	2019-10-10 19:48:00	100	62	TRUE	2019-10-10 19:48:00	EN	Never	Seafood market,Grocery store,Restaurant,Other	Very familiar	Extremely concerned	Extremely concerned	Extremely concerned	Extremely concerned	Extremely concerned	Extremely likely	Yes	2008	United States of America	North Carolina
2019-10-10 20:39:00	2019-10-10 20:43:00	100	273	TRUE	2019-10-10 20:43:00	EN	Often (once a week)	Grocery store,Restaurant	Vaguely familiar	Extremely concerned	Extremely concerned	Extremely concerned	Extremely concerned	Extremely concerned	Somewhat unlikely	No	1970	United States of America	Florida
2019-10-10 20:48:00	2019-10-10 20:50:00	100	102	TRUE	2019-10-10 20:50:00	EN	Seldom (once or twice a year)	Restaurant	Never heard of it	Extremely concerned	Extremely concerned	Extremely concerned	Extremely concerned	Extremely concerned	Extremely likely	No	1970	United States of America	Minnesota
2019-10-10 21:04:00	2019-10-10 21:07:00	100	205	TRUE	2019-10-10 21:07:00	EN	Often (once a week)	Seafood market,Grocery store	Never heard of it	Extremely concerned	Very concerned	Not at all concerned	Extremely concerned	Moderately concerned	Extremely likely	No	1953	United States of America	Maine
2019-10-10 21:39:00	2019-10-10 21:41:00	100	150	TRUE	2019-10-10 21:41:00	EN	Sometimes (once or twice a month)	Grocery store,Restaurant	Never heard of it	Extremely concerned	Extremely concerned	Extremely concerned	Extremely concerned	Extremely concerned	Extremely unlikely	No	1994	United States of America	North Carolina
2019-10-10 21:52:00	2019-10-10 21:54:00	100	122	TRUE	2019-10-10 21:54:00	EN	Often (once a week)	Grocery store	Very familiar	Extremely concerned	Extremely concerned	Very concerned	Very concerned	Very concerned	Extremely likely	No	1989	United States of America	North Carolina
2019-10-10 22:07:00	2019-10-10 22:09:00	100	135	TRUE	2019-10-10 22:09:00	EN	Often (once a week)	I do not purchase seafood	Vaguely familiar	Extremely concerned	Extremely concerned	Very concerned	Extremely concerned	Extremely concerned	Somewhat likely	No	1967	United States of America	Minnesota
2019-10-10 22:44:00	2019-10-10 22:47:00	100	141	TRUE	2019-10-10 22:47:00	EN	Very often (several times per week)	Grocery store,Restaurant	Vaguely familiar	Extremely concerned	Very concerned	Very concerned	Extremely concerned	Moderately concerned	Extremely likely	No	1976	United States of America	North Carolina
2019-10-10 22:46:00	2019-10-10 22:49:00	100	164	TRUE	2019-10-10 22:49:00	EN	Sometimes (once or twice a month)	Grocery store,Restaurant	Vaguely familiar	Extremely concerned	Extremely concerned	Moderately concerned	Moderately concerned	Moderately concerned	Somewhat unlikely	No	1988	United States of America	North Carolina
2019-10-10 22:46:00	2019-10-10 22:49:00	100	166	TRUE	2019-10-10 22:49:00	EN	Often (once a week)	Seafood market,Grocery store	Never heard of it	Extremely concerned	Very concerned	Slightly concerned	Extremely concerned	Extremely concerned	Somewhat likely	No	1956	United States of America	New York
2019-10-10 22:52:00	2019-10-10 22:57:00	100	350	TRUE	2019-10-10 22:57:00	EN	Seldom (once or twice a year)	Restaurant	Vaguely familiar	Extremely concerned	Extremely concerned	Very concerned	Very concerned	Very concerned	Extremely likely	No	1947	United States of America	Minnesota
2019-10-10 23:06:00	2019-10-10 23:09:00	100	133	TRUE	2019-10-10 23:09:00	EN	Sometimes (once or twice a month)	Grocery store,Restaurant	Vaguely familiar	Extremely concerned	Very concerned	Very concerned	Extremely concerned	Very concerned	Somewhat unlikely	Yes	1998	United States of America	South Carolina
2019-10-10 23:15:00	2019-10-10 23:19:00	100	218	TRUE	2019-10-10 23:19:00	EN	Sometimes (once or twice a month)	Seafood market,Grocery store,Restaurant	Vaguely familiar	Extremely concerned	Extremely concerned	Very concerned	Very concerned	Extremely concerned	Extremely likely	No	1952	United States of America	North Carolina
2019-10-10 23:56:00	2019-10-10 23:59:00	100	154	TRUE	2019-10-10 23:59:00	EN	Often (once a week)	Other	Vaguely familiar	Extremely concerned	Extremely concerned	Extremely concerned	Extremely concerned	Extremely concerned	Extremely likely	No	1946	United States of America	New Jersey
2019-10-11 00:02:00	2019-10-11 00:04:00	100	130	TRUE	2019-10-11 00:04:00	EN	Sometimes (once or twice a month)	Other	Very familiar	Extremely concerned	Extremely concerned	Extremely concerned	Extremely concerned	Extremely concerned	Extremely likely	No	1975	United States of America	Minnesota
2019-10-11 01:34:00	2019-10-11 01:37:00	100	192	TRUE	2019-10-11 01:37:00	EN	Sometimes (once or twice a month)	Grocery store	Never heard of it	Extremely concerned	Extremely concerned	Extremely concerned	Extremely concerned	Extremely concerned	Extremely likely	No	1968	United States of America	Minnesota
2019-10-11 01:39:00	2019-10-11 01:43:00	100	203	TRUE	2019-10-11 01:43:00	EN	Very often (several times per week)	Grocery store	Never heard of it	Extremely concerned	Extremely concerned	Moderately concerned	Moderately concerned	Extremely concerned	Neither likely nor unlikely	No	1965	United States of America	Florida
2019-10-11 02:02:00	2019-10-11 02:07:00	100	276	TRUE	2019-10-11 02:07:00	EN	Often (once a week)	Grocery store,Restaurant	Vaguely familiar	Extremely concerned	Extremely concerned	Extremely concerned	Extremely concerned	Extremely concerned	Extremely likely	No	1954	United States of America	Washington
2019-10-11 04:04:00	2019-10-11 04:06:00	100	113	TRUE	2019-10-11 04:06:00	EN	Sometimes (once or twice a month)	Seafood market,Grocery store,Restaurant	Very familiar	Extremely concerned	Very concerned	Extremely concerned	Extremely concerned	Moderately concerned	Extremely likely	Yes	1988	United States of America	North Carolina
2019-10-11 08:26:00	2019-10-11 08:28:00	100	126	TRUE	2019-10-11 08:28:00	EN	Sometimes (once or twice a month)	Restaurant	Very familiar	Extremely concerned	Very concerned	Extremely concerned	Extremely concerned	Very concerned	Extremely likely	No	1974	United States of America	Texas
2019-10-11 08:38:00	2019-10-11 08:40:00	100	97	TRUE	2019-10-11 08:40:00	EN	Very often (several times per week)	Grocery store,Restaurant	Vaguely familiar	Extremely concerned	Extremely concerned	Slightly concerned	Moderately concerned	Extremely concerned	Extremely likely	Yes	1993	United States of America	North Carolina
2019-10-11 09:15:00	2019-10-11 09:17:00	100	140	TRUE	2019-10-11 09:17:00	EN	Often (once a week)	Grocery store,Restaurant	Very familiar	Extremely concerned	Moderately concerned	Extremely concerned	Extremely concerned	Slightly concerned	Extremely likely	No	1982	United States of America	Ohio
2019-10-11 09:21:00	2019-10-11 09:23:00	100	109	TRUE	2019-10-11 09:23:00	EN	Very often (several times per week)	Seafood market,Grocery store,Restaurant	Very familiar	Extremely concerned	Moderately concerned	Extremely concerned	Extremely concerned	Very concerned	Extremely likely	No	1964	United States of America	California
2019-10-11 09:23:00	2019-10-11 09:24:00	100	73	TRUE	2019-10-11 09:24:00	EN	Never	I do not purchase seafood	Very familiar	Extremely concerned	Extremely concerned	Extremely concerned	Extremely concerned	Extremely concerned	Extremely likely	Yes	1994	United States of America	North Carolina
2019-10-11 09:24:00	2019-10-11 09:25:00	100	108	TRUE	2019-10-11 09:25:00	EN	Sometimes (once or twice a month)	Seafood market,Grocery store,Restaurant,Other	Very familiar	Extremely concerned	Not at all concerned	Extremely concerned	Extremely concerned	Extremely concerned	Extremely likely	No	1957	United States of America	North Carolina
2019-10-11 09:33:00	2019-10-11 09:37:00	100	242	TRUE	2019-10-11 09:37:00	EN	Sometimes (once or twice a month)	Grocery store,Restaurant	Vaguely familiar	Extremely concerned	Extremely concerned	Extremely concerned	Extremely concerned	Extremely concerned	Somewhat likely	Yes	1997	United States of America	North Carolina
2019-10-11 09:47:00	2019-10-11 09:49:00	100	114	TRUE	2019-10-11 09:49:00	EN	Often (once a week)	Seafood market,Grocery store	Very familiar	Extremely concerned	Very concerned	Moderately concerned	Extremely concerned	Extremely concerned	Extremely likely	No	1992	United States of America	Kansas
2019-10-11 09:53:00	2019-10-11 09:55:00	100	141	TRUE	2019-10-11 09:55:00	EN	Often (once a week)	Seafood market,Grocery store	Vaguely familiar	Extremely concerned	Extremely concerned	Moderately concerned	Extremely concerned	Extremely concerned	Extremely likely	No	1982	United States of America	North Carolina
2019-10-11 09:53:00	2019-10-11 09:55:00	100	134	TRUE	2019-10-11 09:55:00	EN	Seldom (once or twice a year)	Restaurant	Vaguely familiar	Extremely concerned	Moderately concerned	Extremely concerned	Extremely concerned	Slightly concerned	Extremely likely	No	1978	United States of America	North Carolina
2019-10-11 09:55:00	2019-10-11 09:56:00	100	84	TRUE	2019-10-11 09:56:00	EN	Often (once a week)	Grocery store,Other	Vaguely familiar	Extremely concerned	Slightly concerned	Very concerned	Extremely concerned	Extremely concerned	Extremely likely	No	1981	United States of America	North Carolina
2019-10-11 09:58:00	2019-10-11 09:59:00	100	85	TRUE	2019-10-11 09:59:00	EN	Sometimes (once or twice a month)	Restaurant	Very familiar	Extremely concerned	Not at all concerned	Slightly concerned	Extremely concerned	Extremely concerned	Extremely likely	No	1981	United States of America	Ohio
2019-10-11 09:36:00	2019-10-11 09:59:00	100	1403	TRUE	2019-10-11 09:59:00	EN	Sometimes (once or twice a month)	Grocery store	Never heard of it	Extremely concerned	Extremely concerned	Extremely concerned	Extremely concerned	Extremely concerned	Extremely likely	No	1952	United States of America	South Carolina
2019-10-11 09:58:00	2019-10-11 10:01:00	100	153	TRUE	2019-10-11 10:01:00	EN	Sometimes (once or twice a month)	Grocery store,Restaurant	Never heard of it	Extremely concerned	Slightly concerned	Extremely concerned	Extremely concerned	Extremely concerned	Extremely likely	No	1967	United States of America	North Carolina
2019-10-11 10:00:00	2019-10-11 10:02:00	100	120	TRUE	2019-10-11 10:02:00	EN	Sometimes (once or twice a month)	Seafood market,Grocery store,Restaurant	Very familiar	Extremely concerned	Very concerned	Very concerned	Very concerned	Very concerned	Extremely likely	No	1959	United States of America	North Carolina
2019-10-11 10:04:00	2019-10-11 10:06:00	100	166	TRUE	2019-10-11 10:06:00	EN	Never	I do not purchase seafood	Vaguely familiar	Extremely concerned	Extremely concerned	Extremely concerned	Extremely concerned	Very concerned	Somewhat likely	Yes	1995	United States of America	North Carolina
2019-10-11 10:06:00	2019-10-11 10:08:00	100	98	TRUE	2019-10-11 10:08:00	EN	Very often (several times per week)	Grocery store,Restaurant,Other	Never heard of it	Extremely concerned	Extremely concerned	Extremely concerned	Extremely concerned	Moderately concerned	Extremely likely	No	1977	United States of America	North Carolina
2019-10-11 10:07:00	2019-10-11 10:09:00	100	107	TRUE	2019-10-11 10:09:00	EN	Often (once a week)	Grocery store	Very familiar	Extremely concerned	Not at all concerned	Extremely concerned	Extremely concerned	Extremely concerned	Extremely likely	No	1957	United States of America	North Carolina
2019-10-11 10:08:00	2019-10-11 10:10:00	100	127	TRUE	2019-10-11 10:10:00	EN	Often (once a week)	Grocery store	Vaguely familiar	Extremely concerned	Extremely concerned	Extremely concerned	Extremely concerned	Moderately concerned	Extremely likely	No	1969	United States of America	North Carolina
2019-10-11 10:30:00	2019-10-11 10:34:00	100	207	TRUE	2019-10-11 10:34:00	EN	Very often (several times per week)	Seafood market,Restaurant	Vaguely familiar	Extremely concerned	Very concerned	Very concerned	Extremely concerned	Extremely concerned	Extremely likely	No	1958	United States of America	North Carolina
2019-10-11 10:38:00	2019-10-11 10:39:00	100	109	TRUE	2019-10-11 10:39:00	EN	Often (once a week)	Grocery store,Restaurant	Never heard of it	Extremely concerned	Extremely concerned	Not at all concerned	Very concerned	Slightly concerned	Extremely likely	No	1988	United States of America	Virginia
2019-10-11 11:18:00	2019-10-11 11:19:00	100	103	TRUE	2019-10-11 11:19:00	EN	Very often (several times per week)	Grocery store	Never heard of it	Extremely concerned	Extremely concerned	Extremely concerned	Extremely concerned	Extremely concerned	Extremely likely	No	1982	United States of America	Minnesota
2019-10-11 11:21:00	2019-10-11 11:24:00	100	163	TRUE	2019-10-11 11:24:00	EN	Sometimes (once or twice a month)	Grocery store	Very familiar	Extremely concerned	Extremely concerned	Extremely concerned	Extremely concerned	Very concerned	Extremely likely	No	1970	United States of America	North Carolina
2019-10-11 11:28:00	2019-10-11 11:30:00	100	133	TRUE	2019-10-11 11:30:00	EN	Sometimes (once or twice a month)	Restaurant	Vaguely familiar	Extremely concerned	Very concerned	Very concerned	Extremely concerned	Very concerned	Extremely likely	No	1943	United States of America	Pennsylvania
2019-10-11 11:32:00	2019-10-11 11:34:00	100	133	TRUE	2019-10-11 11:34:00	EN	Often (once a week)	Seafood market,Grocery store	Vaguely familiar	Extremely concerned	Not at all concerned	Very concerned	Extremely concerned	Very concerned	Extremely likely	No	1986	France
2019-10-11 12:00:00	2019-10-11 12:03:00	100	190	TRUE	2019-10-11 12:03:00	EN	Sometimes (once or twice a month)	Grocery store,Restaurant	Vaguely familiar	Extremely concerned	Extremely concerned	Extremely concerned	Extremely concerned	Extremely concerned	Somewhat likely	Yes	1991	United States of America	North Carolina
2019-10-11 12:04:00	2019-10-11 12:06:00	100	116	TRUE	2019-10-11 12:06:00	EN	Often (once a week)	Seafood market	Vaguely familiar	Extremely concerned	Very concerned	Very concerned	Very concerned	Very concerned	Extremely likely	No	1939	United States of America	Virginia
2019-10-11 12:08:00	2019-10-11 12:11:00	100	155	TRUE	2019-10-11 12:11:00	EN	Often (once a week)	Seafood market,Grocery store	Vaguely familiar	Extremely concerned	Moderately concerned	Extremely concerned	Extremely concerned	Very concerned	Somewhat likely	No	1977	United States of America	Rhode Island
2019-10-11 12:15:00	2019-10-11 12:17:00	100	114	TRUE	2019-10-11 12:17:00	EN	Sometimes (once or twice a month)	Grocery store,Restaurant	Vaguely familiar	Extremely concerned	Very concerned	Very concerned	Extremely concerned	Extremely concerned	Extremely likely	No	1988	United States of America	Florida
2019-10-11 12:19:00	2019-10-11 12:21:00	100	120	TRUE	2019-10-11 12:21:00	EN	Sometimes (once or twice a month)	Seafood market,Grocery store,Restaurant	Very familiar	Extremely concerned	Moderately concerned	Extremely concerned	Extremely concerned	Extremely concerned	Extremely likely	No	1985	United States of America	Florida
2019-10-11 12:20:00	2019-10-11 12:23:00	100	146	TRUE	2019-10-11 12:23:00	EN	Often (once a week)	Grocery store	Never heard of it	Extremely concerned	Very concerned	Very concerned	Very concerned	Very concerned	Extremely likely	No	1957	United States of America	North Carolina
2019-10-11 12:50:00	2019-10-11 12:51:00	100	73	TRUE	2019-10-11 12:51:00	EN	Never	I do not purchase seafood	Vaguely familiar	Extremely concerned	Extremely concerned	Moderately concerned	Extremely concerned	Moderately concerned	Somewhat likely	Yes	2000	United States of America	Georgia
2019-10-11 13:03:00	2019-10-11 13:05:00	100	156	TRUE	2019-10-11 13:05:00	EN	Sometimes (once or twice a month)	Grocery store	Never heard of it	Extremely concerned	Very concerned	Very concerned	Very concerned	Very concerned	Somewhat likely	No	1953	United States of America	Arizona
2019-10-11 13:07:00	2019-10-11 13:09:00	100	128	TRUE	2019-10-11 13:09:00	EN	Sometimes (once or twice a month)	Grocery store,Restaurant	Vaguely familiar	Extremely concerned	Moderately concerned	Extremely concerned	Extremely concerned	Very concerned	Extremely likely	No	1941	United States of America	California
2019-10-11 13:22:00	2019-10-11 13:24:00	100	103	TRUE	2019-10-11 13:24:00	EN	Often (once a week)	Grocery store	Very familiar	Extremely concerned	Very concerned	Very concerned	Extremely concerned	Moderately concerned	Extremely likely	No	1986	United States of America	Missouri
2019-10-11 13:24:00	2019-10-11 13:25:00	100	57	TRUE	2019-10-11 13:25:00	EN	Never	I do not purchase seafood	Very familiar	Extremely concerned	Not at all concerned	Very concerned	Extremely concerned	Slightly concerned	Somewhat likely	No	1991	United States of America	Florida
2019-10-11 13:38:00	2019-10-11 13:40:00	100	133	TRUE	2019-10-11 13:40:00	EN	Sometimes (once or twice a month)	Other	Never heard of it	Extremely concerned	Extremely concerned	Very concerned	Extremely concerned	Extremely concerned	Extremely likely	No	1980	United States of America	North Carolina
2019-10-11 13:43:00	2019-10-11 13:44:00	100	82	TRUE	2019-10-11 13:44:00	EN	Often (once a week)	I do not purchase seafood	Vaguely familiar	Extremely concerned	Moderately concerned	Extremely concerned	Extremely concerned	Very concerned	Extremely likely	No	1993	United States of America	North Carolina
2019-10-11 13:55:00	2019-10-11 13:57:00	100	110	TRUE	2019-10-11 13:57:00	EN	Sometimes (once or twice a month)	Grocery store	Vaguely familiar	Extremely concerned	Moderately concerned	Moderately concerned	Extremely concerned	Very concerned	Extremely likely	No	1989	United States of America	Florida
2019-10-11 13:58:00	2019-10-11 14:02:00	100	182	TRUE	2019-10-11 14:02:00	EN	Sometimes (once or twice a month)	Seafood market	Vaguely familiar	Extremely concerned	Extremely concerned	Very concerned	Extremely concerned	Moderately concerned	Extremely likely	No	1966	United States of America	North Carolina
2019-10-11 14:01:00	2019-10-11 14:04:00	100	154	TRUE	2019-10-11 14:04:00	EN	Sometimes (once or twice a month)	Seafood market,Restaurant	Vaguely familiar	Extremely concerned	Extremely concerned	Extremely concerned	Extremely concerned	Extremely concerned	Extremely likely	No	1969	United States of America	New York
2019-10-11 14:11:00	2019-10-11 14:13:00	100	117	TRUE	2019-10-11 14:13:00	EN	Seldom (once or twice a year)	Grocery store	Never heard of it	Extremely concerned	Very concerned	Very concerned	Very concerned	Very concerned	Somewhat likely	No	1971	United States of America	North Carolina
2019-10-11 14:29:00	2019-10-11 14:34:00	100	311	TRUE	2019-10-11 14:34:00	EN	Often (once a week)	Grocery store,Restaurant	Vaguely familiar	Extremely concerned	Extremely concerned	Very concerned	Very concerned	Extremely concerned	Extremely likely	No	1937	United States of America	North Carolina
2019-10-11 14:42:00	2019-10-11 14:44:00	100	116	TRUE	2019-10-11 14:44:00	EN	Never	I do not purchase seafood	Very familiar	Extremely concerned	Extremely concerned	Extremely concerned	Extremely concerned	Extremely concerned	Extremely unlikely	No	1995	United States of America	North Carolina
2019-10-11 14:50:00	2019-10-11 14:52:00	100	138	TRUE	2019-10-11 14:52:00	EN	Often (once a week)	Seafood market,Grocery store,Restaurant	Never heard of it	Extremely concerned	Very concerned	Extremely concerned	Extremely concerned	Extremely concerned	Extremely likely	No	1952	United States of America	North Carolina
2019-10-11 14:50:00	2019-10-11 14:56:00	100	380	TRUE	2019-10-11 14:56:00	EN	Often (once a week)	Restaurant	Never heard of it	Extremely concerned	Extremely concerned	Extremely concerned	Extremely concerned	Extremely concerned	Neither likely nor unlikely	Yes	2001	United States of America	North Carolina
2019-10-11 15:20:00	2019-10-11 15:22:00	100	113	TRUE	2019-10-11 15:22:00	EN	Very often (several times per week)	Seafood market,Restaurant	Vaguely familiar	Extremely concerned	Extremely concerned	Extremely concerned	Extremely concerned	Extremely concerned	Extremely likely	No	1980-03-15	United States of America	Georgia
2019-10-11 15:20:00	2019-10-11 15:24:00	100	210	TRUE	2019-10-11 15:24:00	EN	Very often (several times per week)	Grocery store	Very familiar	Extremely concerned	Extremely concerned	Extremely concerned	Extremely concerned	Extremely concerned	Extremely likely	No	1942	United States of America	North Carolina
2019-10-11 16:22:00	2019-10-11 16:25:00	100	150	TRUE	2019-10-11 16:25:00	EN	Very often (several times per week)	Grocery store	Vaguely familiar	Extremely concerned	Extremely concerned	Moderately concerned	Very concerned	Extremely concerned	Extremely likely	No	1963	United States of America	Massachusetts
2019-10-11 16:53:00	2019-10-11 16:54:00	100	92	TRUE	2019-10-11 16:54:00	EN	Sometimes (once or twice a month)	I do not purchase seafood	Never heard of it	Extremely concerned	Very concerned	Extremely concerned	Extremely concerned	Extremely concerned	Somewhat likely	Yes	20011	United States of America	North Carolina
2019-10-11 17:02:00	2019-10-11 17:06:00	100	184	TRUE	2019-10-11 17:06:00	EN	Often (once a week)	Grocery store,Restaurant	Vaguely familiar	Extremely concerned	Extremely concerned	Extremely concerned	Extremely concerned	Very concerned	Extremely likely	No	1940	United States of America	Texas
2019-10-11 17:07:00	2019-10-11 17:13:00	100	371	TRUE	2019-10-11 17:13:00	EN	Often (once a week)	Seafood market,Grocery store,Restaurant	Never heard of it	Extremely concerned	Moderately concerned	Very concerned	Extremely concerned	Extremely concerned	Somewhat likely	No	1962	United States of America	North Carolina
2019-10-11 17:15:00	2019-10-11 17:19:00	100	225	TRUE	2019-10-11 17:19:00	EN	Sometimes (once or twice a month)	Restaurant	Vaguely familiar	Extremely concerned	Extremely concerned	Very concerned	Moderately concerned	Extremely concerned	Somewhat likely	No	1976	United States of America	North Carolina
2019-10-11 17:23:00	2019-10-11 17:25:00	100	132	TRUE	2019-10-11 17:25:00	EN	Sometimes (once or twice a month)	Grocery store	Never heard of it	Extremely concerned	Extremely concerned	Extremely concerned	Very concerned	Extremely concerned	Extremely likely	No	1977	United States of America	Ohio
2019-10-11 17:39:00	2019-10-11 17:41:00	100	137	TRUE	2019-10-11 17:41:00	EN	Often (once a week)	Seafood market,Restaurant	Vaguely familiar	Extremely concerned	Very concerned	Extremely concerned	Extremely concerned	Very concerned	Extremely likely	No	1945	United States of America	North Carolina
2019-10-11 17:59:00	2019-10-11 18:04:00	100	283	TRUE	2019-10-11 18:04:00	EN	Seldom (once or twice a year)	Restaurant	Very familiar	Extremely concerned	Extremely concerned	Moderately concerned	Very concerned	Very concerned	Somewhat unlikely	No	1945...	United States of America	Massachusetts
2019-10-11 18:02:00	2019-10-11 18:06:00	100	250	TRUE	2019-10-11 18:06:00	EN	Sometimes (once or twice a month)	Grocery store,Restaurant	Vaguely familiar	Extremely concerned	Extremely concerned	Extremely concerned	Extremely concerned	Extremely concerned	Extremely likely	No	1960	United States of America	Texas
2019-10-11 18:19:00	2019-10-11 18:22:00	100	184	TRUE	2019-10-11 18:22:00	EN	Sometimes (once or twice a month)	Grocery store,Restaurant	Never heard of it	Extremely concerned	Extremely concerned	Extremely concerned	Extremely concerned	Extremely concerned	Extremely likely	No	1945	United States of America	North Carolina
2019-10-11 18:23:00	2019-10-11 18:27:00	100	208	TRUE	2019-10-11 18:27:00	EN	Often (once a week)	Seafood market,Grocery store,Restaurant	Never heard of it	Extremely concerned	Very concerned	Very concerned	Very concerned	Extremely concerned	Somewhat likely	No	1977	United States of America	North Carolina
2019-10-11 18:23:00	2019-10-11 18:27:00	100	197	TRUE	2019-10-11 18:27:00	EN	Sometimes (once or twice a month)	Restaurant	Never heard of it	Extremely concerned	Very concerned	Very concerned	Very concerned	Extremely concerned	Extremely likely	No	1949	United States of America	North Carolina
2019-10-11 18:27:00	2019-10-11 18:29:00	100	127	TRUE	2019-10-11 18:29:00	EN	Very often (several times per week)	Grocery store	Vaguely familiar	Extremely concerned	Extremely concerned	Extremely concerned	Extremely concerned	Extremely concerned	Extremely likely	No	1954	United States of America	North Carolina
2019-10-11 18:43:00	2019-10-11 18:45:00	100	152	TRUE	2019-10-11 18:45:00	EN	Often (once a week)	Grocery store	Vaguely familiar	Extremely concerned	Extremely concerned	Not at all concerned	Moderately concerned	Extremely concerned	Extremely likely	No	1966	United States of America	Virginia
2019-10-11 18:46:00	2019-10-11 18:48:00	100	144	TRUE	2019-10-11 18:48:00	EN	Seldom (once or twice a year)	Restaurant	Very familiar	Extremely concerned	Extremely concerned	Very concerned	Extremely concerned	Moderately concerned	Neither likely nor unlikely	No	1959	United States of America	Massachusetts
2019-10-11 18:55:00	2019-10-11 18:57:00	100	135	TRUE	2019-10-11 18:57:00	EN	Sometimes (once or twice a month)	Grocery store	Very familiar	Extremely concerned	Moderately concerned	Moderately concerned	Extremely concerned	Moderately concerned	Somewhat likely	No	1984	United States of America	Florida
2019-10-11 19:02:00	2019-10-11 19:06:00	100	237	TRUE	2019-10-11 19:06:00	EN	Sometimes (once or twice a month)	Grocery store,Restaurant	Vaguely familiar	Extremely concerned	Moderately concerned	Not at all concerned	Moderately concerned	Very concerned	Extremely likely	No	1966	United States of America	Massachusetts
2019-10-11 19:17:00	2019-10-11 19:21:00	100	237	TRUE	2019-10-11 19:21:00	EN	Often (once a week)	Grocery store	Vaguely familiar	Extremely concerned	Extremely concerned	Extremely concerned	Extremely concerned	Extremely concerned	Extremely unlikely	No	1941	United States of America	North Carolina
2019-10-11 20:06:00	2019-10-11 20:08:00	100	122	TRUE	2019-10-11 20:08:00	EN	Very often (several times per week)	Seafood market	Very familiar	Extremely concerned	Not at all concerned	Very concerned	Extremely concerned	Very concerned	Extremely likely	No	1950	United States of America	Pennsylvania
2019-10-11 20:17:00	2019-10-11 20:19:00	100	125	TRUE	2019-10-11 20:19:00	EN	Sometimes (once or twice a month)	Grocery store	Never heard of it	Extremely concerned	Moderately concerned	Extremely concerned	Extremely concerned	Moderately concerned	Extremely likely	No	1967	United States of America	North Carolina
2019-10-11 20:57:00	2019-10-11 21:00:00	100	200	TRUE	2019-10-11 21:00:00	EN	Often (once a week)	Seafood market	Vaguely familiar	Extremely concerned	Extremely concerned	Extremely concerned	Extremely concerned	Very concerned	Somewhat likely	No	1939	United States of America	North Carolina
2019-10-11 20:58:00	2019-10-11 21:00:00	100	113	TRUE	2019-10-11 21:00:00	EN	Often (once a week)	Seafood market,Grocery store,Restaurant	Very familiar	Extremely concerned	Not at all concerned	Extremely concerned	Extremely concerned	Very concerned	Extremely likely	No	1963	United States of America	Vermont
2019-10-11 21:01:00	2019-10-11 21:04:00	100	133	TRUE	2019-10-11 21:04:00	EN	Sometimes (once or twice a month)	Grocery store	Never heard of it	Extremely concerned	Extremely concerned	Extremely concerned	Moderately concerned	Slightly concerned	Somewhat likely	No	1981	United States of America	North Carolina
2019-10-11 21:37:00	2019-10-11 21:39:00	100	154	TRUE	2019-10-11 21:39:00	EN	Sometimes (once or twice a month)	Seafood market,Restaurant	Vaguely familiar	Extremely concerned	Very concerned	Very concerned	Very concerned	Very concerned	Extremely likely	No	1947	United States of America	North Carolina
2019-10-11 21:48:00	2019-10-11 21:50:00	100	126	TRUE	2019-10-11 21:50:00	EN	Often (once a week)	Grocery store	Never heard of it	Extremely concerned	Extremely concerned	Extremely concerned	Extremely concerned	Extremely concerned	Extremely unlikely	Yes	1988	United States of America	North Carolina
2019-10-11 22:56:00	2019-10-11 22:59:00	100	203	TRUE	2019-10-11 22:59:00	EN	Sometimes (once or twice a month)	Grocery store	Vaguely familiar	Extremely concerned	Moderately concerned	Extremely concerned	Extremely concerned	Extremely concerned	Extremely likely	No	1971	United States of America	Minnesota
2019-10-11 23:21:00	2019-10-11 23:22:00	100	80	TRUE	2019-10-11 23:22:00	EN	Often (once a week)	Grocery store,Restaurant	Vaguely familiar	Extremely concerned	Not at all concerned	Moderately concerned	Extremely concerned	Slightly concerned	Somewhat likely	No	1979	Canada
2019-10-11 23:44:00	2019-10-11 23:47:00	100	163	TRUE	2019-10-11 23:47:00	EN	Very often (several times per week)	Grocery store	Never heard of it	Extremely concerned	Extremely concerned	Very concerned	Very concerned	Very concerned	Somewhat likely	No	1976	United States of America	Illinois
2019-10-12 00:15:00	2019-10-12 00:19:00	100	216	TRUE	2019-10-12 00:19:00	EN	Very often (several times per week)	Grocery store,Restaurant	Never heard of it	Extremely concerned	Extremely concerned	Extremely concerned	Extremely concerned	Extremely concerned	Extremely unlikely	No	1979	United States of America	Illinois
2019-10-12 00:18:00	2019-10-12 00:19:00	100	100	TRUE	2019-10-12 00:19:00	EN	Sometimes (once or twice a month)	Restaurant	Vaguely familiar	Extremely concerned	Very concerned	Extremely concerned	Extremely concerned	Moderately concerned	Extremely likely	No	1991	United States of America	Maryland
2019-10-12 00:53:00	2019-10-12 00:56:00	100	136	TRUE	2019-10-12 00:56:00	EN	Very often (several times per week)	Grocery store	Never heard of it	Extremely concerned	Extremely concerned	Extremely concerned	Extremely concerned	Extremely concerned	Somewhat unlikely	No	1962	United States of America	Minnesota
2019-10-12 01:21:00	2019-10-12 01:24:00	100	195	TRUE	2019-10-12 01:24:00	EN	Often (once a week)	Grocery store	Very familiar	Extremely concerned	Extremely concerned	Extremely concerned	Extremely concerned	Extremely concerned	Extremely likely	No	1968	United States of America	North Carolina
2019-10-12 02:11:00	2019-10-12 02:13:00	100	130	TRUE	2019-10-12 02:13:00	EN	Very often (several times per week)	Seafood market	Very familiar	Extremely concerned	Very concerned	Extremely concerned	Extremely concerned	Very concerned	Extremely likely	No	1962	United States of America	California
2019-10-12 05:07:00	2019-10-12 05:09:00	100	115	TRUE	2019-10-12 05:09:00	EN	Sometimes (once or twice a month)	Grocery store	Very familiar	Extremely concerned	Moderately concerned	Very concerned	Extremely concerned	Extremely concerned	Extremely likely	No	1980	South Africa
2019-10-12 07:38:00	2019-10-12 07:40:00	100	148	TRUE	2019-10-12 07:40:00	EN	Very often (several times per week)	Seafood market	Vaguely familiar	Extremely concerned	Very concerned	Moderately concerned	Extremely concerned	Very concerned	Extremely likely	No	1947	United States of America	North Carolina
2019-10-12 08:09:00	2019-10-12 08:12:00	100	222	TRUE	2019-10-12 08:12:00	EN	Sometimes (once or twice a month)	Grocery store	Never heard of it	Extremely concerned	Extremely concerned	Very concerned	Very concerned	Very concerned	Somewhat unlikely	No	1966	United States of America	North Carolina
2019-10-12 08:59:00	2019-10-12 09:06:00	100	400	TRUE	2019-10-12 09:06:00	EN	Sometimes (once or twice a month)	Seafood market	Never heard of it	Extremely concerned	Extremely concerned	Very concerned	Extremely concerned	Extremely concerned	Extremely likely	No	1969	United States of America	North Carolina
2019-10-12 09:41:00	2019-10-12 09:46:00	100	285	TRUE	2019-10-12 09:46:00	EN	Sometimes (once or twice a month)	Grocery store	Vaguely familiar	Extremely concerned	Extremely concerned	Extremely concerned	Extremely concerned	Extremely concerned	Extremely likely	No	1944	United States of America	Florida
2019-10-12 11:59:00	2019-10-12 12:01:00	100	148	TRUE	2019-10-12 12:01:00	EN	Very often (several times per week)	Seafood market,Grocery store,Restaurant	Vaguely familiar	Extremely concerned	Extremely concerned	Extremely concerned	Extremely concerned	Very concerned	Extremely likely	No	1959	Switzerland
2019-10-12 12:35:00	2019-10-12 12:37:00	100	117	TRUE	2019-10-12 12:37:00	EN	Often (once a week)	Grocery store,Restaurant	Never heard of it	Extremely concerned	Very concerned	Very concerned	Very concerned	Very concerned	Somewhat likely	Yes	1997	United States of America	North Carolina
2019-10-12 14:18:00	2019-10-12 14:20:00	100	147	TRUE	2019-10-12 14:20:00	EN	Never	I do not purchase seafood	Never heard of it	Extremely concerned	Extremely concerned	Not at all concerned	Extremely concerned	Moderately concerned	Extremely likely	No	1969	United States of America	Minnesota
2019-10-12 19:13:00	2019-10-12 19:16:00	100	162	TRUE	2019-10-12 19:16:00	EN	Often (once a week)	Seafood market	Vaguely familiar	Extremely concerned	Extremely concerned	Extremely concerned	Extremely concerned	Moderately concerned	Extremely likely	No	1965	Australia
2019-10-12 21:48:00	2019-10-12 21:51:00	100	190	TRUE	2019-10-12 21:51:00	EN	Sometimes (once or twice a month)	Grocery store	Very familiar	Extremely concerned	Moderately concerned	Very concerned	Extremely concerned	Very concerned	Somewhat likely	No	1996	United States of America	North Carolina
2019-10-12 23:12:00	2019-10-12 23:14:00	100	135	TRUE	2019-10-12 23:14:00	EN	Often (once a week)	Grocery store,Restaurant	Vaguely familiar	Extremely concerned	Extremely concerned	Extremely concerned	Extremely concerned	Moderately concerned	Extremely likely	No	1969	United States of America
2019-10-13 07:46:00	2019-10-13 07:48:00	100	114	TRUE	2019-10-13 07:48:00	EN	Often (once a week)	Seafood market,Grocery store,Restaurant	Very familiar	Extremely concerned	Very concerned	Very concerned	Extremely concerned	Extremely concerned	Extremely likely	No	1970	United States of America	North Carolina
2019-10-13 09:03:00	2019-10-13 09:05:00	100	125	TRUE	2019-10-13 09:05:00	EN	Sometimes (once or twice a month)	Grocery store,Restaurant	Very familiar	Extremely concerned	Extremely concerned	Very concerned	Extremely concerned	Very concerned	Extremely likely	No	1972	United States of America	Virginia
2019-10-13 11:14:00	2019-10-13 11:17:00	100	142	TRUE	2019-10-13 11:17:00	EN	Often (once a week)	Grocery store	Vaguely familiar	Extremely concerned	Extremely concerned	Extremely concerned	Extremely concerned	Extremely concerned	Extremely likely	No	1941	United States of America	North Carolina
2019-10-13 11:46:00	2019-10-13 11:49:00	100	199	TRUE	2019-10-13 11:49:00	EN	Sometimes (once or twice a month)	Grocery store	Very familiar	Extremely concerned	Extremely concerned	Very concerned	Extremely concerned	Extremely concerned	Extremely likely	No	1951	United States of America	Louisiana
2019-10-13 12:10:00	2019-10-13 12:12:00	100	117	TRUE	2019-10-13 12:12:00	EN	Sometimes (once or twice a month)	Grocery store,Other	Vaguely familiar	Extremely concerned	Very concerned	Extremely concerned	Extremely concerned	Very concerned	Extremely likely	No	1972	United States of America	Maryland
2019-10-13 12:26:00	2019-10-13 12:29:00	100	176	TRUE	2019-10-13 12:29:00	EN	Seldom (once or twice a year)	Restaurant	Vaguely familiar	Extremely concerned	Extremely concerned	Very concerned	Extremely concerned	Extremely concerned	Extremely likely	No	1969	United States of America	Michigan
2019-10-13 13:59:00	2019-10-13 14:03:00	100	189	TRUE	2019-10-13 14:03:00	EN	Sometimes (once or twice a month)	Grocery store	Vaguely familiar	Extremely concerned	Moderately concerned	Moderately concerned	Very concerned	Very concerned	Extremely likely	No	1958	United States of America	North Carolina
2019-10-13 16:35:00	2019-10-13 16:38:00	100	135	TRUE	2019-10-13 16:38:00	EN	Often (once a week)	Grocery store	Vaguely familiar	Extremely concerned	Moderately concerned	Very concerned	Extremely concerned	Very concerned	Extremely likely	No	1962	United States of America	North Carolina
2019-10-13 18:54:00	2019-10-13 18:56:00	100	127	TRUE	2019-10-13 18:56:00	EN	Often (once a week)	Restaurant	Vaguely familiar	Extremely concerned	Extremely concerned	Extremely concerned	Extremely concerned	Moderately concerned	Extremely likely	No	1978	United States of America	California
2019-10-13 20:24:00	2019-10-13 20:26:00	100	129	TRUE	2019-10-13 20:26:00	EN	Sometimes (once or twice a month)	Restaurant	Never heard of it	Extremely concerned	Extremely concerned	Extremely concerned	Extremely concerned	Moderately concerned	Extremely likely	No	1974	United States of America	North Carolina
2019-10-13 20:38:00	2019-10-13 20:43:00	100	296	TRUE	2019-10-13 20:43:00	EN	Often (once a week)	Seafood market,Grocery store	Vaguely familiar	Extremely concerned	Extremely concerned	Moderately concerned	Very concerned	Very concerned	Extremely likely	No	1973	United States of America	North Carolina
2019-10-13 20:46:00	2019-10-13 20:52:00	100	347	TRUE	2019-10-13 20:52:00	EN	Sometimes (once or twice a month)	Seafood market,Grocery store	Never heard of it	Extremely concerned	Extremely concerned	Not at all concerned	Very concerned	Extremely concerned	Somewhat likely	No	1972	United States of America	North Carolina
2019-10-13 21:12:00	2019-10-13 21:13:00	100	102	TRUE	2019-10-13 21:13:00	EN	Never	I do not purchase seafood	Never heard of it	Extremely concerned	Extremely concerned	Extremely concerned	Extremely concerned	Moderately concerned	Extremely likely	No	1992	United States of America	Kansas
2019-10-13 22:54:00	2019-10-13 22:56:00	100	117	TRUE	2019-10-13 22:56:00	EN	Often (once a week)	Grocery store,Restaurant,Other	Very familiar	Extremely concerned	Very concerned	Very concerned	Extremely concerned	Very concerned	Extremely likely	Yes	1999	United States of America	North Carolina
2019-10-14 08:37:00	2019-10-14 08:40:00	100	196	TRUE	2019-10-14 08:40:00	EN	Sometimes (once or twice a month)	Grocery store	Vaguely familiar	Extremely concerned	Extremely concerned	Very concerned	Extremely concerned	Very concerned	Extremely likely	No	1943	United States of America	North Carolina
2019-10-14 12:32:00	2019-10-14 12:35:00	100	165	TRUE	2019-10-14 12:35:00	EN	Sometimes (once or twice a month)	Seafood market,Restaurant	Vaguely familiar	Extremely concerned	Slightly concerned	Very concerned	Very concerned	Very concerned	Extremely likely	No	1954	United States of America	North Carolina
2019-10-14 13:21:00	2019-10-14 13:25:00	100	195	TRUE	2019-10-14 13:25:00	EN	Sometimes (once or twice a month)	Grocery store	Never heard of it	Extremely concerned	Very concerned	Very concerned	Extremely concerned	Very concerned	Extremely likely	No	1978	United States of America	North Carolina
2019-10-14 14:14:00	2019-10-14 14:16:00	100	106	TRUE	2019-10-14 14:16:00	EN	Sometimes (once or twice a month)	Grocery store	Never heard of it	Extremely concerned	Extremely concerned	Extremely concerned	Extremely concerned	Extremely concerned	Extremely likely	Yes	2001	United States of America	Illinois
2019-10-14 14:16:00	2019-10-14 14:18:00	100	99	TRUE	2019-10-14 14:18:00	EN	Often (once a week)	Seafood market,Grocery store,Restaurant	Vaguely familiar	Extremely concerned	Moderately concerned	Very concerned	Extremely concerned	Very concerned	Extremely likely	No	1979	United States of America	Georgia
2019-10-14 14:37:00	2019-10-14 14:38:00	100	75	TRUE	2019-10-14 14:38:00	EN	Never	I do not purchase seafood	Vaguely familiar	Extremely concerned	Extremely concerned	Extremely concerned	Extremely concerned	Extremely concerned	Neither likely nor unlikely	Yes	2001	United States of America	North Dakota
2019-10-14 14:43:00	2019-10-14 14:45:00	100	170	TRUE	2019-10-14 14:45:00	EN	Sometimes (once or twice a month)	Restaurant	Vaguely familiar	Extremely concerned	Extremely concerned	Extremely concerned	Extremely concerned	Extremely concerned	Extremely likely	Yes	1987	United States of America	Georgia
2019-10-14 14:46:00	2019-10-14 14:47:00	100	67	TRUE	2019-10-14 14:47:00	EN	Often (once a week)	Other	Never heard of it	Extremely concerned	Not at all concerned	Very concerned	Very concerned	Extremely concerned	Somewhat likely	Yes	2001	United States of America	North Carolina
2019-10-11 15:49:00	2019-10-14 14:49:00	100	255559	TRUE	2019-10-14 14:49:00	EN	Often (once a week)	Seafood market,Grocery store,Restaurant	Very familiar	Extremely concerned	Moderately concerned	Extremely concerned	Extremely concerned	Moderately concerned	Extremely likely	Yes	1994	United States of America	California
2019-10-14 14:51:00	2019-10-14 14:55:00	100	231	TRUE	2019-10-14 14:55:00	EN	Sometimes (once or twice a month)	Seafood market,Grocery store,Other	Never heard of it	Extremely concerned	Very concerned	Very concerned	Very concerned	Very concerned	Extremely likely	No	1973	United States of America	North Carolina
2019-10-14 15:32:00	2019-10-14 15:35:00	100	138	TRUE	2019-10-14 15:35:00	EN	Often (once a week)	Other	Very familiar	Extremely concerned	Slightly concerned	Extremely concerned	Extremely concerned	Moderately concerned	Extremely likely	Yes	1988	United States of America	Georgia
2019-10-14 15:42:00	2019-10-14 15:46:00	100	244	TRUE	2019-10-14 15:46:00	EN	Sometimes (once or twice a month)	Restaurant	Very familiar	Extremely concerned	Very concerned	Moderately concerned	Slightly concerned	Extremely concerned	Somewhat unlikely	Yes	1996	United States of America	North Carolina
2019-10-14 15:54:00	2019-10-14 15:56:00	100	122	TRUE	2019-10-14 15:56:00	EN	Often (once a week)	Restaurant	Vaguely familiar	Extremely concerned	Extremely concerned	Extremely concerned	Extremely concerned	Extremely concerned	Extremely unlikely	Yes	1994	United States of America	Georgia
2019-10-14 16:13:00	2019-10-14 16:19:00	100	335	TRUE	2019-10-14 16:19:00	EN	Sometimes (once or twice a month)	Grocery store,Restaurant	Never heard of it	Extremely concerned	Moderately concerned	Moderately concerned	Extremely concerned	Extremely concerned	Somewhat likely	No	1951	United States of America	North Carolina
2019-10-14 17:13:00	2019-10-14 17:17:00	100	265	TRUE	2019-10-14 17:17:00	EN	Sometimes (once or twice a month)	Restaurant	Vaguely familiar	Extremely concerned	Very concerned	Very concerned	Very concerned	Extremely concerned	Extremely unlikely	No	1944	United States of America	North Carolina
2019-10-14 19:29:00	2019-10-14 19:32:00	100	201	TRUE	2019-10-14 19:32:00	EN	Never	I do not purchase seafood	Never heard of it	Extremely concerned	Not at all concerned	Extremely concerned	Extremely concerned	Extremely concerned	Extremely unlikely	No	1951	United States of America	North Carolina
2019-10-14 19:31:00	2019-10-14 19:34:00	100	180	TRUE	2019-10-14 19:34:00	EN	Often (once a week)	Seafood market,Grocery store,Restaurant,Other	Never heard of it	Extremely concerned	Extremely concerned	Very concerned	Extremely concerned	Extremely concerned	Somewhat likely	No	1959	United States of America	Georgia
2019-10-14 21:10:00	2019-10-14 21:12:00	100	128	TRUE	2019-10-14 21:12:00	EN	Sometimes (once or twice a month)	Grocery store,Restaurant	Never heard of it	Extremely concerned	Extremely concerned	Very concerned	Extremely concerned	Extremely concerned	Extremely likely	No	1994	United States of America	Virginia
2019-10-14 22:30:00	2019-10-14 22:32:00	100	126	TRUE	2019-10-14 22:32:00	EN	Sometimes (once or twice a month)	Grocery store	Never heard of it	Extremely concerned	Extremely concerned	Extremely concerned	Extremely concerned	Extremely concerned	Extremely likely	No	1977	United States of America	North Carolina
2019-10-15 08:55:00	2019-10-15 08:56:00	100	66	TRUE	2019-10-15 08:56:00	EN	Very often (several times per week)	Seafood market	Very familiar	Extremely concerned	Moderately concerned	Extremely concerned	Extremely concerned	Very concerned	Extremely likely	Yes	1998	United States of America	North Carolina
2019-10-16 00:08:00	2019-10-16 00:10:00	100	131	TRUE	2019-10-16 00:10:00	EN	Very often (several times per week)	Grocery store	Never heard of it	Extremely concerned	Very concerned	Extremely concerned	Extremely concerned	Very concerned	Extremely likely	No	1976	United States of America	California
2019-10-16 07:45:00	2019-10-16 07:52:00	100	445	TRUE	2019-10-16 07:52:00	EN	Sometimes (once or twice a month)	Grocery store,Restaurant	Never heard of it	Extremely concerned	Extremely concerned	Extremely concerned	Extremely concerned	Extremely concerned	Extremely likely	No	1994	United States of America	North Carolina
2019-10-16 14:45:00	2019-10-16 14:47:00	100	110	TRUE	2019-10-16 14:47:00	EN	Often (once a week)	Grocery store	Never heard of it	Extremely concerned	Extremely concerned	Moderately concerned	Very concerned	Not at all concerned	Somewhat likely	No	1988	United States of America	North Carolina
2019-10-16 23:07:00	2019-10-16 23:10:00	100	160	TRUE	2019-10-16 23:10:00	EN	Often (once a week)	Grocery store,Restaurant	Very familiar	Extremely concerned	Very concerned	Extremely concerned	Extremely concerned	Moderately concerned	Extremely likely	Yes	1997	United States of America	North Carolina
2019-10-17 19:21:00	2019-10-17 19:23:00	100	157	TRUE	2019-10-17 19:23:00	EN	Often (once a week)	Grocery store,Restaurant	Vaguely familiar	Extremely concerned	Extremely concerned	Extremely concerned	Extremely concerned	Moderately concerned	Somewhat likely	Yes	1996	United States of America	Georgia
2019-10-19 10:36:00	2019-10-19 10:39:00	100	190	TRUE	2019-10-19 10:39:00	EN	Seldom (once or twice a year)	Other	Vaguely familiar	Extremely concerned	Extremely concerned	Extremely concerned	Extremely concerned	Extremely concerned	Extremely likely	No	1968	United States of America	North Carolina
2019-10-19 10:39:00	2019-10-19 10:42:00	100	153	TRUE	2019-10-19 10:42:00	EN	Often (once a week)	Seafood market,Grocery store,Restaurant	Never heard of it	Extremely concerned	Not at all concerned	Extremely concerned	Extremely concerned	Extremely concerned	Extremely likely	No	1961	United States of America	North Carolina
2019-10-19 11:01:00	2019-10-19 11:04:00	100	154	TRUE	2019-10-19 11:04:00	EN	Often (once a week)	Grocery store	Never heard of it	Extremely concerned	Extremely concerned	Extremely concerned	Extremely concerned	Extremely concerned	Extremely likely	No	1952	United States of America	North Carolina
2019-10-19 11:48:00	2019-10-19 11:51:00	100	144	TRUE	2019-10-19 11:51:00	EN	Seldom (once or twice a year)	Restaurant	Vaguely familiar	Extremely concerned	Extremely concerned	Very concerned	Extremely concerned	Extremely concerned	Somewhat unlikely	No	1966-02-13	United States of America	North Carolina
2019-10-19 12:38:00	2019-10-19 12:42:00	100	239	TRUE	2019-10-19 12:42:00	EN	Often (once a week)	Grocery store,Restaurant	Vaguely familiar	Extremely concerned	Moderately concerned	Extremely concerned	Extremely concerned	Slightly concerned	Extremely likely	No	1972	United States of America	North Carolina
2019-10-19 12:31:00	2019-10-19 12:43:00	100	688	TRUE	2019-10-19 12:43:00	EN	Sometimes (once or twice a month)	Grocery store	Vaguely familiar	Extremely concerned	Extremely concerned	Extremely concerned	Extremely concerned	Extremely concerned	Extremely likely	No	1962	United States of America	North Carolina
2019-10-19 13:07:00	2019-10-19 13:11:00	100	215	TRUE	2019-10-19 13:11:00	EN	Often (once a week)	Grocery store,Restaurant	Vaguely familiar	Extremely concerned	Extremely concerned	Moderately concerned	Extremely concerned	Extremely concerned	Extremely likely	No	1979	United States of America	North Carolina
2019-10-19 13:18:00	2019-10-19 13:23:00	100	286	TRUE	2019-10-19 13:23:00	EN	Seldom (once or twice a year)	Grocery store	Never heard of it	Extremely concerned	Extremely concerned	Extremely concerned	Extremely concerned	Extremely concerned	Extremely likely	No	1963	United States of America	North Carolina
2019-10-19 15:07:00	2019-10-19 15:09:00	100	112	TRUE	2019-10-19 15:09:00	EN	Often (once a week)	Grocery store	Very familiar	Extremely concerned	Extremely concerned	Slightly concerned	Extremely concerned	Slightly concerned	Extremely likely	No	1974	United States of America	North Carolina
2019-10-19 16:07:00	2019-10-19 16:09:00	100	149	TRUE	2019-10-19 16:09:00	EN	Often (once a week)	Seafood market	Vaguely familiar	Extremely concerned	Very concerned	Extremely concerned	Extremely concerned	Very concerned	Extremely likely	No	1951	United States of America	North Carolina
2019-10-19 23:15:00	2019-10-19 23:19:00	100	257	TRUE	2019-10-19 23:19:00	EN	Often (once a week)	Seafood market	Vaguely familiar	Extremely concerned	Very concerned	Very concerned	Extremely concerned	Very concerned	Extremely likely	No	1957	United States of America	North Carolina
2019-10-20 07:18:00	2019-10-20 07:21:00	100	162	TRUE	2019-10-20 07:21:00	EN	Often (once a week)	Grocery store,Other	Never heard of it	Extremely concerned	Extremely concerned	Moderately concerned	Moderately concerned	Very concerned	Extremely likely	No	1967	United States of America	North Carolina
2019-10-21 08:39:00	2019-10-21 08:42:00	100	168	TRUE	2019-10-21 08:42:00	EN	Seldom (once or twice a year)	Seafood market,Grocery store,Restaurant	Vaguely familiar	Extremely concerned	Extremely concerned	Extremely concerned	Extremely concerned	Extremely concerned	Extremely likely	No	1972	United States of America	North Carolina
2019-10-23 09:30:00	2019-10-23 09:33:00	100	142	TRUE	2019-10-23 09:33:00	EN	Very often (several times per week)	Seafood market,Grocery store,Restaurant,Other	Vaguely familiar	Extremely concerned	Not at all concerned	Moderately concerned	Very concerned	Extremely concerned	Extremely likely	Yes	1993	United States of America	Georgia
2019-10-24 01:09:00	2019-10-24 01:11:00	100	150	TRUE	2019-10-24 01:11:00	EN	Often (once a week)	Seafood market,Grocery store,Restaurant	Never heard of it	Extremely concerned	Extremely concerned	Moderately concerned	Extremely concerned	Extremely concerned	Somewhat unlikely	Yes	2001	United States of America	Pennsylvania
2019-10-24 18:22:00	2019-10-24 18:25:00	100	147	TRUE	2019-10-24 18:25:00	EN	Sometimes (once or twice a month)	Seafood market,Other	Vaguely familiar	Extremely concerned	Extremely concerned	Extremely concerned	Extremely concerned	Extremely concerned	Extremely likely	No	1992	United States of America	North Carolina
2019-10-24 21:16:00	2019-10-24 21:18:00	100	78	TRUE	2019-10-24 21:18:00	EN	Never	I do not purchase seafood	Very familiar	Extremely concerned	Extremely concerned	Extremely concerned	Extremely concerned	Extremely concerned	Somewhat likely	Yes	2002	United States of America	North Carolina
2019-10-25 06:49:00	2019-10-25 06:51:00	100	125	TRUE	2019-10-25 06:51:00	EN	Sometimes (once or twice a month)	Restaurant	Vaguely familiar	Extremely concerned	Not at all concerned	Moderately concerned	Slightly concerned	Moderately concerned	Neither likely nor unlikely	No	1980	United States of America	South Carolina
2019-10-27 17:46:00	2019-10-27 17:49:00	100	174	TRUE	2019-10-27 17:49:00	EN	Very often (several times per week)	Restaurant	Never heard of it	Extremely concerned	Moderately concerned	Extremely concerned	Extremely concerned	Slightly concerned	Extremely unlikely	Yes	2001	United States of America	North Carolina
2019-11-05 14:43:00	2019-11-05 14:45:00	100	113	TRUE	2019-11-05 14:45:00	EN	Often (once a week)	Grocery store,Restaurant	Never heard of it	Extremely concerned	Extremely concerned	Extremely concerned	Extremely concerned	Very concerned	Extremely likely	No	1976	United States of America	North Carolina
2019-11-10 11:15:00	2019-11-10 11:19:00	100	220	TRUE	2019-11-10 11:19:00	EN	Often (once a week)	Grocery store	Vaguely familiar	Extremely concerned	Extremely concerned	Moderately concerned	Extremely concerned	Slightly concerned	Extremely likely	No	1975	United States of America	North Carolina
2019-11-13 18:50:00	2019-11-13 18:52:00	100	90	TRUE	2019-11-13 18:52:00	EN	Sometimes (once or twice a month)	Grocery store	Vaguely familiar	Extremely concerned	Moderately concerned	Extremely concerned	Extremely concerned	Extremely concerned	Extremely likely	No	1944	United States of America	California
2019-11-14 10:15:00	2019-11-14 10:17:00	100	121	TRUE	2019-11-14 10:17:00	EN	Sometimes (once or twice a month)	Seafood market,Restaurant	Vaguely familiar	Extremely concerned	Extremely concerned	Moderately concerned	Moderately concerned	Extremely concerned	Extremely likely	Yes	1985	United States of America	North Carolina
2019-12-03 15:39:00	2019-12-03 15:41:00	100	101	TRUE	2019-12-03 15:41:00	EN	Often (once a week)	Restaurant	Vaguely familiar	Extremely concerned	Very concerned	Slightly concerned	Moderately concerned	Moderately concerned	Neither likely nor unlikely	Yes	1998	United States of America	North Carolina
2019-12-07 10:42:00	2019-12-07 10:45:00	100	199	TRUE	2019-12-07 10:45:00	EN	Seldom (once or twice a year)	Restaurant	Very familiar	Extremely concerned	Extremely concerned	Extremely concerned	Extremely concerned	Very concerned	Extremely likely	No	1947	Mexico	California
2020-01-24 15:26:00	2020-01-24 15:30:00	100	251	TRUE	2020-01-24 15:30:00	EN	Never	Restaurant	Never heard of it	Extremely concerned	Extremely concerned	Extremely concerned	Extremely concerned	Moderately concerned	Somewhat likely	Yes	1995	United States of America	North Carolina
2019-10-10 12:08:00	2019-10-10 12:10:00	100	91	TRUE	2019-10-10 12:10:00	EN	Sometimes (once or twice a month)	Restaurant	Very familiar	Moderately concerned	Extremely concerned	Extremely concerned	Extremely concerned	Extremely concerned	Somewhat likely	Yes	2000	United States of America	North Carolina
2019-10-10 12:21:00	2019-10-10 12:23:00	100	89	TRUE	2019-10-10 12:23:00	EN	Sometimes (once or twice a month)	Restaurant	Very familiar	Moderately concerned	Very concerned	Moderately concerned	Extremely concerned	Slightly concerned	Extremely likely	Yes	2001	United States of America	North Carolina
2019-10-10 12:45:00	2019-10-10 12:47:00	100	107	TRUE	2019-10-10 12:47:00	EN	Sometimes (once or twice a month)	Seafood market,Restaurant	Never heard of it	Moderately concerned	Slightly concerned	Slightly concerned	Moderately concerned	Very concerned	Somewhat likely	Yes	2000	United States of America	Massachusetts
2019-10-10 12:47:00	2019-10-10 12:49:00	100	107	TRUE	2019-10-10 12:49:00	EN	Sometimes (once or twice a month)	Seafood market,Grocery store,Restaurant	Never heard of it	Moderately concerned	Slightly concerned	Very concerned	Extremely concerned	Moderately concerned	Somewhat unlikely	Yes	2000	United States of America	Massachusetts
2019-10-10 12:49:00	2019-10-10 12:51:00	100	135	TRUE	2019-10-10 12:51:00	EN	Sometimes (once or twice a month)	Restaurant	Never heard of it	Moderately concerned	Extremely concerned	Very concerned	Very concerned	Moderately concerned	Extremely likely	Yes	1999	United States of America	North Carolina
2019-10-10 12:50:00	2019-10-10 12:53:00	100	135	TRUE	2019-10-10 12:53:00	EN	Never	I do not purchase seafood	Vaguely familiar	Moderately concerned	Slightly concerned	Moderately concerned	Very concerned	Moderately concerned	Neither likely nor unlikely	Yes	1998	United States of America	North Carolina
2019-10-10 12:52:00	2019-10-10 12:54:00	100	131	TRUE	2019-10-10 12:54:00	EN	Sometimes (once or twice a month)	I do not purchase seafood	Never heard of it	Moderately concerned	Very concerned	Very concerned	Very concerned	Very concerned	Neither likely nor unlikely	Yes	2000	United States of America	North Carolina
2019-10-10 12:53:00	2019-10-10 12:54:00	100	92	TRUE	2019-10-10 12:54:00	EN	Seldom (once or twice a year)	I do not purchase seafood	Never heard of it	Moderately concerned	Extremely concerned	Moderately concerned	Extremely concerned	Moderately concerned	Extremely unlikely	Yes	2000	United States of America	North Carolina
2019-10-10 12:53:00	2019-10-10 12:55:00	100	104	TRUE	2019-10-10 12:55:00	EN	Never	I do not purchase seafood	Very familiar	Moderately concerned	Very concerned	Extremely concerned	Extremely concerned	Slightly concerned	Extremely unlikely	Yes	2000	United States of America	North Carolina
2019-10-10 12:53:00	2019-10-10 12:56:00	100	206	TRUE	2019-10-10 12:56:00	EN	Sometimes (once or twice a month)	Grocery store,Restaurant	Vaguely familiar	Moderately concerned	Moderately concerned	Slightly concerned	Very concerned	Very concerned	Somewhat unlikely	Yes	1997	United States of America	North Carolina
2019-10-10 12:54:00	2019-10-10 12:57:00	100	145	TRUE	2019-10-10 12:57:00	EN	Sometimes (once or twice a month)	Seafood market	Vaguely familiar	Moderately concerned	Very concerned	Moderately concerned	Extremely concerned	Moderately concerned	Somewhat likely	Yes	1999	United States of America	Massachusetts
2019-10-10 12:55:00	2019-10-10 12:57:00	100	121	TRUE	2019-10-10 12:57:00	EN	Often (once a week)	Seafood market	Vaguely familiar	Moderately concerned	Very concerned	Very concerned	Very concerned	Moderately concerned	Somewhat likely	Yes	2000	United States of America	North Carolina
2019-10-10 12:55:00	2019-10-10 12:58:00	100	209	TRUE	2019-10-10 12:58:00	EN	Sometimes (once or twice a month)	Grocery store	Never heard of it	Moderately concerned	Slightly concerned	Moderately concerned	Moderately concerned	Very concerned	Somewhat likely	Yes	2001	United States of America	North Carolina
2019-10-10 12:52:00	2019-10-10 12:59:00	100	445	TRUE	2019-10-10 12:59:00	EN	Often (once a week)	Restaurant,Other	Vaguely familiar	Moderately concerned	Moderately concerned	Moderately concerned	Moderately concerned	Moderately concerned	Somewhat likely	Yes	2001	United States of America	North Carolina
2019-10-10 12:58:00	2019-10-10 13:00:00	100	118	TRUE	2019-10-10 13:00:00	EN	Sometimes (once or twice a month)	Grocery store,Restaurant	Vaguely familiar	Moderately concerned	Slightly concerned	Moderately concerned	Very concerned	Moderately concerned	Somewhat likely	Yes	2000	United States of America	North Carolina
2019-10-10 12:57:00	2019-10-10 13:00:00	100	168	TRUE	2019-10-10 13:00:00	EN	Often (once a week)	Grocery store,Restaurant	Vaguely familiar	Moderately concerned	Moderately concerned	Very concerned	Not at all concerned	Very concerned	Neither likely nor unlikely	Yes	2001	United States of America	North Carolina
2019-10-10 12:55:00	2019-10-10 13:01:00	100	356	TRUE	2019-10-10 13:01:00	EN	Sometimes (once or twice a month)	Grocery store,Restaurant	Vaguely familiar	Moderately concerned	Moderately concerned	Moderately concerned	Very concerned	Very concerned	Neither likely nor unlikely	No	1960	United States of America	North Carolina
2019-10-10 13:02:00	2019-10-10 13:03:00	100	94	TRUE	2019-10-10 13:03:00	EN	Sometimes (once or twice a month)	I do not purchase seafood	Never heard of it	Moderately concerned	Moderately concerned	Very concerned	Very concerned	Very concerned	Somewhat likely	Yes	2001	United States of America	North Carolina
2019-10-10 13:02:00	2019-10-10 13:04:00	100	87	TRUE	2019-10-10 13:04:00	EN	Often (once a week)	Restaurant	Vaguely familiar	Moderately concerned	Slightly concerned	Slightly concerned	Slightly concerned	Moderately concerned	Somewhat likely	Yes	1997	United States of America	Massachusetts
2019-10-10 13:09:00	2019-10-10 13:11:00	100	133	TRUE	2019-10-10 13:11:00	EN	Seldom (once or twice a year)	Restaurant	Never heard of it	Moderately concerned	Very concerned	Moderately concerned	Very concerned	Slightly concerned	Neither likely nor unlikely	Yes	2001	United States of America	North Carolina
2019-10-10 13:11:00	2019-10-10 13:13:00	100	81	TRUE	2019-10-10 13:13:00	EN	Seldom (once or twice a year)	Restaurant	Very familiar	Moderately concerned	Extremely concerned	Slightly concerned	Moderately concerned	Very concerned	Somewhat unlikely	Yes	2000	United States of America	North Carolina
2019-10-10 13:12:00	2019-10-10 13:14:00	100	96	TRUE	2019-10-10 13:14:00	EN	Sometimes (once or twice a month)	Grocery store,Restaurant	Vaguely familiar	Moderately concerned	Extremely concerned	Extremely concerned	Extremely concerned	Extremely concerned	Neither likely nor unlikely	Yes	2000	United States of America	Massachusetts
2019-10-10 13:10:00	2019-10-10 13:25:00	100	892	TRUE	2019-10-10 13:25:00	EN	Sometimes (once or twice a month)	Seafood market,Grocery store	Vaguely familiar	Moderately concerned	Moderately concerned	Moderately concerned	Moderately concerned	Moderately concerned	Neither likely nor unlikely	Yes	2004	United States of America	North Carolina
2019-10-10 13:29:00	2019-10-10 13:31:00	100	116	TRUE	2019-10-10 13:31:00	EN	Often (once a week)	Grocery store	Never heard of it	Moderately concerned	Slightly concerned	Slightly concerned	Moderately concerned	Moderately concerned	Somewhat likely	Yes	1999	Canada
2019-10-10 13:29:00	2019-10-10 13:32:00	100	150	TRUE	2019-10-10 13:32:00	EN	Sometimes (once or twice a month)	Grocery store,Restaurant	Vaguely familiar	Moderately concerned	Moderately concerned	Slightly concerned	Moderately concerned	Slightly concerned	Extremely likely	Yes	2000	United States of America	Virginia
2019-10-10 13:07:00	2019-10-10 13:39:00	100	1919	TRUE	2019-10-10 13:39:00	EN	Seldom (once or twice a year)	Other	Vaguely familiar	Moderately concerned	Very concerned	Moderately concerned	Moderately concerned	Moderately concerned	Somewhat likely	No	1987	United States of America	Minnesota
2019-10-10 13:39:00	2019-10-10 13:41:00	100	117	TRUE	2019-10-10 13:41:00	EN	Sometimes (once or twice a month)	Grocery store,Restaurant	Vaguely familiar	Moderately concerned	Very concerned	Moderately concerned	Moderately concerned	Very concerned	Somewhat likely	No	1997	United States of America	North Carolina
2019-10-10 13:42:00	2019-10-10 13:44:00	100	170	TRUE	2019-10-10 13:44:00	EN	Sometimes (once or twice a month)	Restaurant	Vaguely familiar	Moderately concerned	Very concerned	Slightly concerned	Moderately concerned	Very concerned	Extremely likely	No	2001	United States of America	North Carolina
2019-10-10 13:43:00	2019-10-10 13:44:00	100	96	TRUE	2019-10-10 13:45:00	EN	Never	I do not purchase seafood	Never heard of it	Moderately concerned	Very concerned	Moderately concerned	Moderately concerned	Slightly concerned	Somewhat likely	Yes	1999	United States of America	North Carolina
2019-10-10 13:45:00	2019-10-10 13:47:00	100	89	TRUE	2019-10-10 13:47:00	EN	Very often (several times per week)	Restaurant	Vaguely familiar	Moderately concerned	Very concerned	Very concerned	Very concerned	Extremely concerned	Somewhat likely	Yes	1999	United States of America	North Carolina
2019-10-10 13:47:00	2019-10-10 13:49:00	100	72	TRUE	2019-10-10 13:49:00	EN	Often (once a week)	Seafood market	Vaguely familiar	Moderately concerned	Very concerned	Moderately concerned	Moderately concerned	Very concerned	Somewhat likely	Yes	2001	United States of America	North Carolina
2019-10-10 13:47:00	2019-10-10 13:49:00	100	112	TRUE	2019-10-10 13:49:00	EN	Sometimes (once or twice a month)	Grocery store,Restaurant	Vaguely familiar	Moderately concerned	Slightly concerned	Very concerned	Extremely concerned	Very concerned	Extremely likely	Yes	1997	United States of America	Colorado
2019-10-10 13:47:00	2019-10-10 13:49:00	100	154	TRUE	2019-10-10 13:49:00	EN	Sometimes (once or twice a month)	Restaurant	Never heard of it	Moderately concerned	Extremely concerned	Extremely concerned	Extremely concerned	Extremely concerned	Neither likely nor unlikely	Yes	2001	United States of America	North Carolina
2019-10-10 13:44:00	2019-10-10 13:49:00	100	335	TRUE	2019-10-10 13:49:00	EN	Often (once a week)	Grocery store,Restaurant	Vaguely familiar	Moderately concerned	Very concerned	Extremely concerned	Extremely concerned	Very concerned	Extremely unlikely	No	1945	United States of America	North Carolina
2019-10-10 13:48:00	2019-10-10 13:50:00	100	106	TRUE	2019-10-10 13:50:00	EN	Seldom (once or twice a year)	Grocery store,Restaurant	Vaguely familiar	Moderately concerned	Extremely concerned	Very concerned	Extremely concerned	Moderately concerned	Somewhat likely	Yes	1999	United States of America	North Carolina
2019-10-10 13:51:00	2019-10-10 13:53:00	100	93	TRUE	2019-10-10 13:53:00	EN	Often (once a week)	Grocery store,Restaurant	Vaguely familiar	Moderately concerned	Very concerned	Moderately concerned	Moderately concerned	Very concerned	Extremely likely	No	2002	United States of America	North Carolina
2019-10-10 13:52:00	2019-10-10 13:53:00	100	76	TRUE	2019-10-10 13:53:00	EN	Sometimes (once or twice a month)	Grocery store	Vaguely familiar	Moderately concerned	Very concerned	Very concerned	Very concerned	Moderately concerned	Somewhat likely	Yes	1998	United States of America	North Carolina
2019-10-10 13:53:00	2019-10-10 13:55:00	100	121	TRUE	2019-10-10 13:55:00	EN	Seldom (once or twice a year)	Seafood market,Grocery store,Restaurant	Never heard of it	Moderately concerned	Slightly concerned	Slightly concerned	Very concerned	Very concerned	Extremely likely	Yes	2001	United States of America	North Carolina
2019-10-10 13:53:00	2019-10-10 13:55:00	100	117	TRUE	2019-10-10 13:55:00	EN	Sometimes (once or twice a month)	Restaurant	Never heard of it	Moderately concerned	Very concerned	Moderately concerned	Very concerned	Very concerned	Neither likely nor unlikely	Yes	2001	United States of America	North Carolina
2019-10-10 13:53:00	2019-10-10 13:56:00	100	159	TRUE	2019-10-10 13:56:00	EN	Sometimes (once or twice a month)	Restaurant	Vaguely familiar	Moderately concerned	Very concerned	Very concerned	Very concerned	Moderately concerned	Somewhat unlikely	Yes	1998	United States of America	North Carolina
2019-10-10 13:55:00	2019-10-10 13:56:00	100	82	TRUE	2019-10-10 13:56:00	EN	Seldom (once or twice a year)	Restaurant	Vaguely familiar	Moderately concerned	Moderately concerned	Very concerned	Very concerned	Moderately concerned	Somewhat likely	Yes	1999	United States of America	North Carolina
2019-10-10 13:55:00	2019-10-10 13:56:00	100	109	TRUE	2019-10-10 13:56:00	EN	Sometimes (once or twice a month)	Seafood market	Very familiar	Moderately concerned	Slightly concerned	Moderately concerned	Very concerned	Slightly concerned	Somewhat likely	Yes	1998	United States of America	North Carolina
2019-10-10 13:56:00	2019-10-10 13:57:00	100	113	TRUE	2019-10-10 13:57:00	EN	Sometimes (once or twice a month)	Seafood market,Grocery store,Restaurant	Never heard of it	Moderately concerned	Moderately concerned	Moderately concerned	Very concerned	Very concerned	Extremely likely	Yes	1999	United States of America	Florida
2019-10-10 13:56:00	2019-10-10 13:58:00	100	127	TRUE	2019-10-10 13:58:00	EN	Very often (several times per week)	Grocery store	Vaguely familiar	Moderately concerned	Extremely concerned	Very concerned	Extremely concerned	Extremely concerned	Extremely likely	Yes	1997	United States of America	North Carolina
2019-10-10 13:56:00	2019-10-10 13:59:00	100	173	TRUE	2019-10-10 13:59:00	EN	Sometimes (once or twice a month)	Restaurant	Vaguely familiar	Moderately concerned	Very concerned	Moderately concerned	Very concerned	Very concerned	Neither likely nor unlikely	Yes	2003	United States of America	North Carolina
2019-10-10 13:58:00	2019-10-10 14:00:00	100	129	TRUE	2019-10-10 14:00:00	EN	Sometimes (once or twice a month)	Grocery store	Never heard of it	Moderately concerned	Moderately concerned	Moderately concerned	Extremely concerned	Extremely concerned	Extremely likely	Yes	1998	United States of America	North Carolina
2019-10-10 14:00:00	2019-10-10 14:02:00	100	95	TRUE	2019-10-10 14:02:00	EN	Often (once a week)	Grocery store	Very familiar	Moderately concerned	Moderately concerned	Very concerned	Very concerned	Moderately concerned	Somewhat likely	Yes	2001	United States of America	North Carolina
2019-10-10 14:02:00	2019-10-10 14:04:00	100	111	TRUE	2019-10-10 14:04:00	EN	Sometimes (once or twice a month)	Seafood market,Grocery store,Restaurant	Vaguely familiar	Moderately concerned	Very concerned	Very concerned	Very concerned	Moderately concerned	Somewhat likely	Yes	2001	United States of America	North Carolina
2019-10-10 14:04:00	2019-10-10 14:06:00	100	108	TRUE	2019-10-10 14:06:00	EN	Sometimes (once or twice a month)	Grocery store,Restaurant	Vaguely familiar	Moderately concerned	Very concerned	Moderately concerned	Very concerned	Moderately concerned	Somewhat likely	No	1994	United States of America	North Carolina
2019-10-10 14:02:00	2019-10-10 14:06:00	100	253	TRUE	2019-10-10 14:06:00	EN	Seldom (once or twice a year)	Restaurant	Very familiar	Moderately concerned	Very concerned	Moderately concerned	Very concerned	Extremely concerned	Extremely likely	No	1940	United States of America	South Carolina
2019-10-10 14:06:00	2019-10-10 14:10:00	100	274	TRUE	2019-10-10 14:10:00	EN	Sometimes (once or twice a month)	Grocery store	Vaguely familiar	Moderately concerned	Moderately concerned	Moderately concerned	Extremely concerned	Very concerned	Extremely likely	No	1964	United States of America	North Carolina
2019-10-10 12:47:00	2019-10-10 14:11:00	100	5010	TRUE	2019-10-10 14:11:00	EN	Never	I do not purchase seafood	Vaguely familiar	Moderately concerned	Moderately concerned	Moderately concerned	Moderately concerned	Moderately concerned	Somewhat likely	Yes	2001	United States of America	North Carolina
2019-10-10 14:08:00	2019-10-10 14:11:00	100	193	TRUE	2019-10-10 14:11:00	EN	Sometimes (once or twice a month)	Restaurant	Never heard of it	Moderately concerned	Moderately concerned	Very concerned	Moderately concerned	Very concerned	Somewhat likely	Yes	2000	United States of America	North Carolina
2019-10-10 14:10:00	2019-10-10 14:12:00	100	111	TRUE	2019-10-10 14:12:00	EN	Sometimes (once or twice a month)	Grocery store,Restaurant	Vaguely familiar	Moderately concerned	Not at all concerned	Slightly concerned	Very concerned	Moderately concerned	Neither likely nor unlikely	No	1964	United States of America	North Carolina
2019-10-10 13:57:00	2019-10-10 14:12:00	100	894	TRUE	2019-10-10 14:12:00	EN	Often (once a week)	Grocery store,Restaurant	Vaguely familiar	Moderately concerned	Very concerned	Not at all concerned	Very concerned	Very concerned	Somewhat likely	Yes	1999	United States of America	North Carolina
2019-10-10 14:10:00	2019-10-10 14:12:00	100	71	TRUE	2019-10-10 14:12:00	EN	Seldom (once or twice a year)	Grocery store	Never heard of it	Moderately concerned	Extremely concerned	Moderately concerned	Moderately concerned	Moderately concerned	Somewhat unlikely	Yes	2001	United States of America	North Carolina
2019-10-10 14:12:00	2019-10-10 14:14:00	100	129	TRUE	2019-10-10 14:14:00	EN	Often (once a week)	Grocery store,Restaurant	Vaguely familiar	Moderately concerned	Moderately concerned	Very concerned	Extremely concerned	Moderately concerned	Somewhat unlikely	Yes	1998	United States of America	North Carolina
2019-10-10 14:14:00	2019-10-10 14:15:00	100	63	TRUE	2019-10-10 14:15:00	EN	Often (once a week)	Restaurant	Vaguely familiar	Moderately concerned	Not at all concerned	Extremely concerned	Extremely concerned	Moderately concerned	Somewhat likely	Yes	1999	United States of America	North Carolina
2019-10-10 14:12:00	2019-10-10 14:15:00	100	192	TRUE	2019-10-10 14:15:00	EN	Often (once a week)	Grocery store	Never heard of it	Moderately concerned	Very concerned	Extremely concerned	Very concerned	Very concerned	Somewhat likely	No	1967	United States of America	Vermont
2019-10-10 14:14:00	2019-10-10 14:17:00	100	139	TRUE	2019-10-10 14:17:00	EN	Sometimes (once or twice a month)	Restaurant	Never heard of it	Moderately concerned	Extremely concerned	Not at all concerned	Moderately concerned	Extremely concerned	Extremely likely	Yes	1996	United States of America	North Carolina
2019-10-10 14:16:00	2019-10-10 14:19:00	100	180	TRUE	2019-10-10 14:19:00	EN	Sometimes (once or twice a month)	Restaurant	Never heard of it	Moderately concerned	Very concerned	Moderately concerned	Very concerned	Very concerned	Somewhat likely	No	1949	United States of America	Florida
2019-10-10 14:18:00	2019-10-10 14:20:00	100	117	TRUE	2019-10-10 14:20:00	EN	Sometimes (once or twice a month)	Grocery store	Vaguely familiar	Moderately concerned	Very concerned	Extremely concerned	Extremely concerned	Moderately concerned	Extremely likely	No	2000	United States of America	North Carolina
2019-10-10 14:19:00	2019-10-10 14:21:00	100	94	TRUE	2019-10-10 14:21:00	EN	Seldom (once or twice a year)	Restaurant	Never heard of it	Moderately concerned	Extremely concerned	Moderately concerned	Very concerned	Very concerned	Extremely unlikely	Yes	2000	United States of America	New York
2019-10-10 14:19:00	2019-10-10 14:21:00	100	148	TRUE	2019-10-10 14:21:00	EN	Seldom (once or twice a year)	Restaurant	Vaguely familiar	Moderately concerned	Extremely concerned	Moderately concerned	Extremely concerned	Moderately concerned	Neither likely nor unlikely	No	1998	United States of America	North Carolina
2019-10-10 14:22:00	2019-10-10 14:23:00	100	97	TRUE	2019-10-10 14:23:00	EN	Often (once a week)	Grocery store,Restaurant	Vaguely familiar	Moderately concerned	Moderately concerned	Moderately concerned	Moderately concerned	Moderately concerned	Neither likely nor unlikely	Yes	2001	United States of America	North Carolina
2019-10-10 14:29:00	2019-10-10 14:31:00	100	129	TRUE	2019-10-10 14:31:00	EN	Often (once a week)	Seafood market	Vaguely familiar	Moderately concerned	Very concerned	Very concerned	Extremely concerned	Extremely concerned	Somewhat unlikely	Yes	1999	United States of America	North Carolina
2019-10-10 14:31:00	2019-10-10 14:33:00	100	98	TRUE	2019-10-10 14:33:00	EN	Sometimes (once or twice a month)	Grocery store,Restaurant	Never heard of it	Moderately concerned	Slightly concerned	Moderately concerned	Very concerned	Moderately concerned	Neither likely nor unlikely	Yes	2000	United States of America	North Carolina
2019-10-10 14:29:00	2019-10-10 14:33:00	100	254	TRUE	2019-10-10 14:33:00	EN	Seldom (once or twice a year)	I do not purchase seafood	Never heard of it	Moderately concerned	Very concerned	Moderately concerned	Moderately concerned	Very concerned	Somewhat likely	No	1955-06-28	United States of America	North Carolina
2019-10-10 14:35:00	2019-10-10 14:37:00	100	172	TRUE	2019-10-10 14:37:00	EN	Sometimes (once or twice a month)	Restaurant	Never heard of it	Moderately concerned	Not at all concerned	Moderately concerned	Moderately concerned	Moderately concerned	Somewhat likely	Yes	2002	United States of America	North Carolina
2019-10-10 14:39:00	2019-10-10 14:41:00	100	116	TRUE	2019-10-10 14:41:00	EN	Sometimes (once or twice a month)	Grocery store	Very familiar	Moderately concerned	Slightly concerned	Not at all concerned	Extremely concerned	Extremely concerned	Extremely unlikely	Yes	1995	United States of America	North Carolina
2019-10-10 14:40:00	2019-10-10 14:42:00	100	153	TRUE	2019-10-10 14:42:00	EN	Often (once a week)	Grocery store,Restaurant	Never heard of it	Moderately concerned	Moderately concerned	Extremely concerned	Extremely concerned	Very concerned	Somewhat likely	Yes	1995	United States of America	Pennsylvania
2019-10-10 14:45:00	2019-10-10 14:48:00	100	189	TRUE	2019-10-10 14:48:00	EN	Often (once a week)	Seafood market	Never heard of it	Moderately concerned	Moderately concerned	Slightly concerned	Slightly concerned	Very concerned	Neither likely nor unlikely	Yes	1999	United States of America	North Carolina
2019-10-10 13:51:00	2019-10-10 14:49:00	100	3509	TRUE	2019-10-10 14:49:00	EN	Sometimes (once or twice a month)	Grocery store,Restaurant	Vaguely familiar	Moderately concerned	Very concerned	Very concerned	Very concerned	Very concerned	Somewhat likely	No	1996	Germany	I do not reside in the United States
2019-10-10 14:47:00	2019-10-10 14:50:00	100	202	TRUE	2019-10-10 14:50:00	EN	Sometimes (once or twice a month)	Restaurant	Never heard of it	Moderately concerned	Very concerned	Very concerned	Very concerned	Moderately concerned	Somewhat likely	Yes	1999	United States of America	North Carolina
2019-10-10 14:51:00	2019-10-10 14:52:00	100	87	TRUE	2019-10-10 14:52:00	EN	Sometimes (once or twice a month)	Grocery store,Other	Vaguely familiar	Moderately concerned	Moderately concerned	Extremely concerned	Extremely concerned	Moderately concerned	Somewhat likely	Yes	2001	United States of America	North Carolina
2019-10-10 14:52:00	2019-10-10 14:55:00	100	181	TRUE	2019-10-10 14:55:00	EN	Sometimes (once or twice a month)	Restaurant	Vaguely familiar	Moderately concerned	Slightly concerned	Very concerned	Extremely concerned	Moderately concerned	Somewhat likely	Yes	2000	United States of America	North Carolina
2019-10-10 15:00:00	2019-10-10 15:04:00	100	240	TRUE	2019-10-10 15:04:00	EN	Seldom (once or twice a year)	Other	Never heard of it	Moderately concerned	Extremely concerned	Moderately concerned	Extremely concerned	Extremely concerned	Neither likely nor unlikely	No	1955	United States of America	North Carolina
2019-10-10 15:09:00	2019-10-10 15:11:00	100	114	TRUE	2019-10-10 15:11:00	EN	Sometimes (once or twice a month)	Restaurant	Vaguely familiar	Moderately concerned	Moderately concerned	Moderately concerned	Moderately concerned	Moderately concerned	Neither likely nor unlikely	Yes	1998	United States of America	North Carolina
2019-10-10 15:08:00	2019-10-10 15:11:00	100	177	TRUE	2019-10-10 15:11:00	EN	Sometimes (once or twice a month)	I do not purchase seafood	Vaguely familiar	Moderately concerned	Very concerned	Moderately concerned	Very concerned	Very concerned	Somewhat likely	Yes	1997	United States of America	North Carolina
2019-10-10 15:14:00	2019-10-10 15:15:00	100	90	TRUE	2019-10-10 15:16:00	EN	Sometimes (once or twice a month)	Seafood market,Grocery store	Vaguely familiar	Moderately concerned	Extremely concerned	Moderately concerned	Extremely concerned	Moderately concerned	Extremely likely	Yes	1994	United States of America	North Carolina
2019-10-10 15:28:00	2019-10-10 15:29:00	100	102	TRUE	2019-10-10 15:29:00	EN	Seldom (once or twice a year)	Grocery store	Vaguely familiar	Moderately concerned	Moderately concerned	Extremely concerned	Very concerned	Extremely concerned	Neither likely nor unlikely	Yes	2000	United States of America	North Carolina
2019-10-10 15:29:00	2019-10-10 15:33:00	100	210	TRUE	2019-10-10 15:33:00	EN	Seldom (once or twice a year)	Seafood market,Grocery store	Vaguely familiar	Moderately concerned	Extremely concerned	Extremely concerned	Extremely concerned	Very concerned	Extremely likely	Yes	1998	United States of America	North Carolina
2019-10-10 15:36:00	2019-10-10 15:38:00	100	97	TRUE	2019-10-10 15:38:00	EN	Often (once a week)	Seafood market,Restaurant	Vaguely familiar	Moderately concerned	Extremely concerned	Extremely concerned	Extremely concerned	Slightly concerned	Extremely likely	Yes	1997	United States of America	North Carolina
2019-10-10 15:37:00	2019-10-10 15:39:00	100	89	TRUE	2019-10-10 15:39:00	EN	Never	I do not purchase seafood	Vaguely familiar	Moderately concerned	Moderately concerned	Moderately concerned	Moderately concerned	Moderately concerned	Somewhat unlikely	Yes	2001	United States of America	North Carolina
2019-10-10 15:38:00	2019-10-10 15:41:00	100	131	TRUE	2019-10-10 15:41:00	EN	Often (once a week)	Other	Vaguely familiar	Moderately concerned	Not at all concerned	Slightly concerned	Very concerned	Very concerned	Somewhat likely	Yes	2000	United States of America	North Carolina
2019-10-10 15:40:00	2019-10-10 15:41:00	100	90	TRUE	2019-10-10 15:41:00	EN	Often (once a week)	Grocery store	Never heard of it	Moderately concerned	Not at all concerned	Slightly concerned	Slightly concerned	Not at all concerned	Neither likely nor unlikely	Yes	2000	United States of America	Colorado
2019-10-10 15:39:00	2019-10-10 15:42:00	100	163	TRUE	2019-10-10 15:42:00	EN	Seldom (once or twice a year)	Restaurant	Vaguely familiar	Moderately concerned	Moderately concerned	Moderately concerned	Very concerned	Very concerned	Extremely likely	No	1971	United States of America	Ohio
2019-10-10 15:39:00	2019-10-10 15:42:00	100	192	TRUE	2019-10-10 15:42:00	EN	Often (once a week)	Restaurant	Never heard of it	Moderately concerned	Slightly concerned	Moderately concerned	Moderately concerned	Slightly concerned	Extremely likely	Yes	1998	United States of America	North Carolina
2019-10-10 15:41:00	2019-10-10 15:42:00	100	101	TRUE	2019-10-10 15:42:00	EN	Sometimes (once or twice a month)	Grocery store,Restaurant	Vaguely familiar	Moderately concerned	Very concerned	Moderately concerned	Extremely concerned	Moderately concerned	Extremely likely	Yes	2001	United States of America	North Carolina
2019-10-10 15:46:00	2019-10-10 15:51:00	100	287	TRUE	2019-10-10 15:51:00	EN	Seldom (once or twice a year)	Grocery store	Vaguely familiar	Moderately concerned	Very concerned	Extremely concerned	Extremely concerned	Very concerned	Somewhat unlikely	Yes	1999	United States of America	North Carolina
2019-10-10 15:51:00	2019-10-10 15:52:00	100	76	TRUE	2019-10-10 15:52:00	EN	Seldom (once or twice a year)	Restaurant	Never heard of it	Moderately concerned	Extremely concerned	Moderately concerned	Very concerned	Moderately concerned	Neither likely nor unlikely	No	1974	United States of America	New Jersey
2019-10-10 15:52:00	2019-10-10 15:54:00	100	104	TRUE	2019-10-10 15:54:00	EN	Seldom (once or twice a year)	Restaurant	Vaguely familiar	Moderately concerned	Very concerned	Very concerned	Moderately concerned	Moderately concerned	Somewhat unlikely	Yes	2001	United States of America	North Carolina
2019-10-10 15:58:00	2019-10-10 16:01:00	100	137	TRUE	2019-10-10 16:01:00	EN	Never	I do not purchase seafood	Vaguely familiar	Moderately concerned	Moderately concerned	Not at all concerned	Extremely concerned	Extremely concerned	Somewhat likely	Yes	1997	United States of America	Florida
2019-10-10 15:58:00	2019-10-10 16:01:00	100	200	TRUE	2019-10-10 16:01:00	EN	Often (once a week)	Restaurant	Vaguely familiar	Moderately concerned	Not at all concerned	Moderately concerned	Very concerned	Extremely concerned	Extremely likely	No	1997	United States of America	North Carolina
2019-10-10 16:18:00	2019-10-10 16:19:00	100	102	TRUE	2019-10-10 16:19:00	EN	Sometimes (once or twice a month)	Seafood market,Grocery store,Restaurant	Vaguely familiar	Moderately concerned	Slightly concerned	Moderately concerned	Moderately concerned	Very concerned	Somewhat likely	No	1988	United States of America	Minnesota
2019-10-10 16:26:00	2019-10-10 16:29:00	100	204	TRUE	2019-10-10 16:29:00	EN	Often (once a week)	Grocery store,Restaurant	Vaguely familiar	Moderately concerned	Slightly concerned	Moderately concerned	Moderately concerned	Very concerned	Somewhat likely	No	1965	United States of America	North Carolina
2019-10-10 16:31:00	2019-10-10 16:32:00	100	109	TRUE	2019-10-10 16:32:00	EN	Sometimes (once or twice a month)	Grocery store,Restaurant	Never heard of it	Moderately concerned	Extremely concerned	Slightly concerned	Extremely concerned	Very concerned	Somewhat likely	No	1997	United States of America	North Carolina
2019-10-10 16:33:00	2019-10-10 16:35:00	100	89	TRUE	2019-10-10 16:35:00	EN	Sometimes (once or twice a month)	Seafood market,Restaurant	Very familiar	Moderately concerned	Extremely concerned	Not at all concerned	Not at all concerned	Very concerned	Extremely likely	No	1978	United States of America	North Carolina
2019-10-10 16:34:00	2019-10-10 16:37:00	100	159	TRUE	2019-10-10 16:37:00	EN	Often (once a week)	Grocery store	Never heard of it	Moderately concerned	Extremely concerned	Extremely concerned	Extremely concerned	Extremely concerned	Extremely likely	No	1959	United States of America	Minnesota
2019-10-10 16:38:00	2019-10-10 16:40:00	100	78	TRUE	2019-10-10 16:40:00	EN	Sometimes (once or twice a month)	Restaurant	Vaguely familiar	Moderately concerned	Very concerned	Moderately concerned	Moderately concerned	Extremely concerned	Extremely likely	Yes	2000	United States of America	North Carolina
2019-10-10 16:43:00	2019-10-10 16:45:00	100	127	TRUE	2019-10-10 16:45:00	EN	Sometimes (once or twice a month)	Grocery store,Restaurant	Never heard of it	Moderately concerned	Extremely concerned	Very concerned	Moderately concerned	Extremely concerned	Neither likely nor unlikely	Yes	1998	United States of America	North Carolina
2019-10-10 16:43:00	2019-10-10 16:45:00	100	120	TRUE	2019-10-10 16:45:00	EN	Sometimes (once or twice a month)	Restaurant	Vaguely familiar	Moderately concerned	Moderately concerned	Extremely concerned	Extremely concerned	Moderately concerned	Somewhat likely	Yes	1998	United States of America	North Carolina
2019-10-10 16:52:00	2019-10-10 16:53:00	100	86	TRUE	2019-10-10 16:53:00	EN	Sometimes (once or twice a month)	Grocery store	Vaguely familiar	Moderately concerned	Moderately concerned	Slightly concerned	Slightly concerned	Slightly concerned	Somewhat likely	Yes	1998	United States of America	North Carolina
2019-10-10 17:08:00	2019-10-10 17:11:00	100	158	TRUE	2019-10-10 17:11:00	EN	Sometimes (once or twice a month)	Grocery store,Restaurant	Never heard of it	Moderately concerned	Not at all concerned	Moderately concerned	Extremely concerned	Extremely concerned	Somewhat likely	No	09/01/200	United States of America	North Carolina
2019-10-10 17:22:00	2019-10-10 17:24:00	100	132	TRUE	2019-10-10 17:24:00	EN	Often (once a week)	Seafood market,Grocery store	Vaguely familiar	Moderately concerned	Very concerned	Not at all concerned	Extremely concerned	Very concerned	Somewhat likely	No	1966	United States of America	North Carolina
2019-10-10 17:21:00	2019-10-10 17:24:00	100	175	TRUE	2019-10-10 17:24:00	EN	Often (once a week)	Seafood market,Grocery store,Restaurant	Never heard of it	Moderately concerned	Extremely concerned	Moderately concerned	Very concerned	Extremely concerned	Extremely likely	No	1964	United States of America	North Carolina
2019-10-10 17:24:00	2019-10-10 17:26:00	100	74	TRUE	2019-10-10 17:26:00	EN	Sometimes (once or twice a month)	I do not purchase seafood	Vaguely familiar	Moderately concerned	Very concerned	Extremely concerned	Extremely concerned	Moderately concerned	Somewhat likely	Yes	2000	United States of America	North Carolina
2019-10-10 17:31:00	2019-10-10 17:34:00	100	171	TRUE	2019-10-10 17:34:00	EN	Sometimes (once or twice a month)	Grocery store	Never heard of it	Moderately concerned	Moderately concerned	Slightly concerned	Moderately concerned	Very concerned	Somewhat likely	Yes	1998	United States of America	North Carolina
2019-10-10 17:42:00	2019-10-10 17:43:00	100	91	TRUE	2019-10-10 17:43:00	EN	Seldom (once or twice a year)	Grocery store,Restaurant	Very familiar	Moderately concerned	Extremely concerned	Very concerned	Extremely concerned	Very concerned	Extremely likely	Yes	1990	United States of America	Wyoming
2019-10-10 17:51:00	2019-10-10 17:53:00	100	115	TRUE	2019-10-10 17:53:00	EN	Sometimes (once or twice a month)	Restaurant	Never heard of it	Moderately concerned	Not at all concerned	Not at all concerned	Moderately concerned	Extremely concerned	Somewhat likely	Yes	1999	United States of America	North Carolina
2019-10-10 17:54:00	2019-10-10 17:55:00	100	103	TRUE	2019-10-10 17:55:00	EN	Sometimes (once or twice a month)	Grocery store,Restaurant	Never heard of it	Moderately concerned	Extremely concerned	Extremely concerned	Extremely concerned	Slightly concerned	Somewhat likely	No	1990	United States of America	Virginia
2019-10-10 17:57:00	2019-10-10 18:00:00	100	147	TRUE	2019-10-10 18:00:00	EN	Often (once a week)	Grocery store,Restaurant	Never heard of it	Moderately concerned	Slightly concerned	Moderately concerned	Very concerned	Extremely concerned	Extremely likely	Yes	1999	United States of America	North Carolina
2019-10-10 18:01:00	2019-10-10 18:03:00	100	129	TRUE	2019-10-10 18:03:00	EN	Sometimes (once or twice a month)	Grocery store,Restaurant	Vaguely familiar	Moderately concerned	Slightly concerned	Moderately concerned	Very concerned	Moderately concerned	Somewhat likely	Yes	1997	United States of America	North Carolina
2019-10-10 18:03:00	2019-10-10 18:04:00	100	92	TRUE	2019-10-10 18:04:00	EN	Sometimes (once or twice a month)	Grocery store	Very familiar	Moderately concerned	Very concerned	Very concerned	Extremely concerned	Slightly concerned	Somewhat unlikely	Yes	1999	United States of America	North Carolina
2019-10-10 18:14:00	2019-10-10 18:15:00	100	112	TRUE	2019-10-10 18:15:00	EN	Often (once a week)	Restaurant	Never heard of it	Moderately concerned	Moderately concerned	Moderately concerned	Moderately concerned	Very concerned	Somewhat unlikely	No	2000	United States of America	Missouri
2019-10-10 18:20:00	2019-10-10 18:23:00	100	138	TRUE	2019-10-10 18:23:00	EN	Sometimes (once or twice a month)	Restaurant	Vaguely familiar	Moderately concerned	Very concerned	Very concerned	Very concerned	Very concerned	Somewhat likely	Yes	1999	United States of America	North Carolina
2019-10-10 18:26:00	2019-10-10 18:29:00	100	176	TRUE	2019-10-10 18:29:00	EN	Sometimes (once or twice a month)	Grocery store	Never heard of it	Moderately concerned	Moderately concerned	Slightly concerned	Very concerned	Very concerned	Somewhat likely	No	1962	United States of America	Illinois
2019-10-10 18:51:00	2019-10-10 18:53:00	100	94	TRUE	2019-10-10 18:53:00	EN	Seldom (once or twice a year)	Restaurant	Never heard of it	Moderately concerned	Very concerned	Moderately concerned	Extremely concerned	Slightly concerned	Somewhat unlikely	Yes	2000	United States of America	New York
2019-10-10 18:58:00	2019-10-10 18:59:00	100	100	TRUE	2019-10-10 18:59:00	EN	Often (once a week)	Grocery store	Vaguely familiar	Moderately concerned	Very concerned	Extremely concerned	Extremely concerned	Extremely concerned	Extremely likely	No	1964	United States of America	North Carolina
2019-10-10 19:24:00	2019-10-10 19:26:00	100	104	TRUE	2019-10-10 19:26:00	EN	Sometimes (once or twice a month)	Grocery store,Restaurant	Never heard of it	Moderately concerned	Not at all concerned	Not at all concerned	Not at all concerned	Moderately concerned	Neither likely nor unlikely	No	1979	United States of America	Illinois
2019-10-10 19:26:00	2019-10-10 19:28:00	100	140	TRUE	2019-10-10 19:28:00	EN	Sometimes (once or twice a month)	Restaurant	Vaguely familiar	Moderately concerned	Moderately concerned	Moderately concerned	Very concerned	Very concerned	Extremely likely	No	1974	United States of America	North Carolina
2019-10-10 19:24:00	2019-10-10 19:29:00	100	270	TRUE	2019-10-10 19:29:00	EN	Sometimes (once or twice a month)	Restaurant	Vaguely familiar	Moderately concerned	Slightly concerned	Slightly concerned	Moderately concerned	Very concerned	Extremely likely	No	1958	United States of America	Florida
2019-10-10 19:32:00	2019-10-10 19:33:00	100	63	TRUE	2019-10-10 19:33:00	EN	Never	I do not purchase seafood	Vaguely familiar	Moderately concerned	Not at all concerned	Extremely concerned	Very concerned	Moderately concerned	Somewhat likely	Yes	2000	United States of America	North Carolina
2019-10-10 19:37:00	2019-10-10 19:38:00	100	82	TRUE	2019-10-10 19:38:00	EN	Sometimes (once or twice a month)	Seafood market,Grocery store	Never heard of it	Moderately concerned	Extremely concerned	Very concerned	Extremely concerned	Very concerned	Neither likely nor unlikely	Yes	2001	United States of America	North Carolina
2019-10-10 19:43:00	2019-10-10 19:44:00	100	105	TRUE	2019-10-10 19:44:00	EN	Often (once a week)	Grocery store	Vaguely familiar	Moderately concerned	Extremely concerned	Very concerned	Extremely concerned	Moderately concerned	Somewhat likely	No	1981	United States of America	North Carolina
2019-10-10 19:52:00	2019-10-10 19:55:00	100	203	TRUE	2019-10-10 19:55:00	EN	Very often (several times per week)	Grocery store	Vaguely familiar	Moderately concerned	Moderately concerned	Very concerned	Very concerned	Very concerned	Extremely unlikely	Yes	1998	United States of America	North Carolina
2019-10-10 19:58:00	2019-10-10 20:01:00	100	191	TRUE	2019-10-10 20:01:00	EN	Sometimes (once or twice a month)	Grocery store,Restaurant	Never heard of it	Moderately concerned	Moderately concerned	Not at all concerned	Very concerned	Very concerned	Neither likely nor unlikely	No	1992	United States of America	North Carolina
2019-10-10 20:29:00	2019-10-10 20:31:00	100	164	TRUE	2019-10-10 20:31:00	EN	Often (once a week)	Grocery store,Restaurant	Vaguely familiar	Moderately concerned	Moderately concerned	Very concerned	Moderately concerned	Very concerned	Somewhat likely	No	1955	United States of America	North Carolina
2019-10-10 20:31:00	2019-10-10 20:33:00	100	74	TRUE	2019-10-10 20:33:00	EN	Never	I do not purchase seafood	Never heard of it	Moderately concerned	Moderately concerned	Slightly concerned	Very concerned	Extremely concerned	Neither likely nor unlikely	Yes	1997	United States of America	North Carolina
2019-10-10 20:34:00	2019-10-10 20:35:00	100	80	TRUE	2019-10-10 20:35:00	EN	Sometimes (once or twice a month)	Grocery store,Restaurant	Vaguely familiar	Moderately concerned	Moderately concerned	Moderately concerned	Extremely concerned	Slightly concerned	Somewhat likely	Yes	1994	United States of America	Alabama
2019-10-10 20:37:00	2019-10-10 20:41:00	100	223	TRUE	2019-10-10 20:41:00	EN	Sometimes (once or twice a month)	Seafood market	Never heard of it	Moderately concerned	Moderately concerned	Slightly concerned	Slightly concerned	Extremely concerned	Neither likely nor unlikely	No	1970	United States of America	North Carolina
2019-10-10 20:44:00	2019-10-10 20:46:00	100	109	TRUE	2019-10-10 20:46:00	EN	Often (once a week)	Grocery store	Vaguely familiar	Moderately concerned	Slightly concerned	Moderately concerned	Moderately concerned	Moderately concerned	Somewhat likely	No	1995	United States of America	Wisconsin
2019-10-10 20:55:00	2019-10-10 20:57:00	100	107	TRUE	2019-10-10 20:57:00	EN	Sometimes (once or twice a month)	Grocery store,Restaurant	Never heard of it	Moderately concerned	Extremely concerned	Moderately concerned	Extremely concerned	Extremely concerned	Extremely likely	No	1985	United States of America	North Carolina
2019-10-10 20:56:00	2019-10-10 20:57:00	100	82	TRUE	2019-10-10 20:57:00	EN	Sometimes (once or twice a month)	Restaurant	Never heard of it	Moderately concerned	Very concerned	Moderately concerned	Moderately concerned	Very concerned	Somewhat likely	No	1993	United States of America	North Carolina
2019-10-10 21:00:00	2019-10-10 21:02:00	100	107	TRUE	2019-10-10 21:02:00	EN	Seldom (once or twice a year)	Restaurant	Vaguely familiar	Moderately concerned	Extremely concerned	Very concerned	Extremely concerned	Very concerned	Somewhat likely	Yes	2000	United States of America	Tennessee
2019-10-10 21:02:00	2019-10-10 21:04:00	100	117	TRUE	2019-10-10 21:04:00	EN	Often (once a week)	Grocery store	Very familiar	Moderately concerned	Slightly concerned	Moderately concerned	Very concerned	Very concerned	Extremely likely	No	1971	United States of America	California
2019-10-10 21:03:00	2019-10-10 21:05:00	100	109	TRUE	2019-10-10 21:05:00	EN	Sometimes (once or twice a month)	Grocery store,Restaurant	Never heard of it	Moderately concerned	Very concerned	Moderately concerned	Moderately concerned	Moderately concerned	Somewhat likely	No	1995	United States of America	North Carolina
2019-10-10 21:16:00	2019-10-10 21:22:00	100	322	TRUE	2019-10-10 21:22:00	EN	Sometimes (once or twice a month)	Grocery store	Vaguely familiar	Moderately concerned	Very concerned	Very concerned	Moderately concerned	Moderately concerned	Somewhat likely	No	1962	United States of America	North Carolina
2019-10-10 21:21:00	2019-10-10 21:24:00	100	170	TRUE	2019-10-10 21:24:00	EN	Often (once a week)	Grocery store,Restaurant	Never heard of it	Moderately concerned	Moderately concerned	Slightly concerned	Moderately concerned	Moderately concerned	Somewhat likely	No	1982	United States of America	North Carolina
2019-10-10 21:26:00	2019-10-10 21:29:00	100	180	TRUE	2019-10-10 21:29:00	EN	Seldom (once or twice a year)	Restaurant	Vaguely familiar	Moderately concerned	Very concerned	Extremely concerned	Extremely concerned	Extremely concerned	Extremely likely	Yes	2000	United States of America	North Carolina
2019-10-10 21:27:00	2019-10-10 21:30:00	100	157	TRUE	2019-10-10 21:30:00	EN	Sometimes (once or twice a month)	Grocery store,Restaurant	Vaguely familiar	Moderately concerned	Extremely concerned	Extremely concerned	Extremely concerned	Very concerned	Extremely likely	No	1946	United States of America	New Jersey
2019-10-10 21:29:00	2019-10-10 21:31:00	100	128	TRUE	2019-10-10 21:31:00	EN	Often (once a week)	Seafood market,Grocery store,Restaurant	Vaguely familiar	Moderately concerned	Very concerned	Very concerned	Extremely concerned	Extremely concerned	Extremely likely	No	1959	United States of America	North Carolina
2019-10-10 21:31:00	2019-10-10 21:34:00	100	160	TRUE	2019-10-10 21:34:00	EN	Sometimes (once or twice a month)	Grocery store,Restaurant	Never heard of it	Moderately concerned	Very concerned	Very concerned	Moderately concerned	Very concerned	Neither likely nor unlikely	No	2962	United States of America	Minnesota
2019-10-10 21:38:00	2019-10-10 21:39:00	100	103	TRUE	2019-10-10 21:39:00	EN	Often (once a week)	Grocery store,Restaurant	Vaguely familiar	Moderately concerned	Moderately concerned	Extremely concerned	Extremely concerned	Very concerned	Somewhat likely	No	1971	United States of America	Connecticut
2019-10-10 21:38:00	2019-10-10 21:41:00	100	171	TRUE	2019-10-10 21:41:00	EN	Sometimes (once or twice a month)	Restaurant	Never heard of it	Moderately concerned	Slightly concerned	Slightly concerned	Moderately concerned	Moderately concerned	Somewhat likely	No	1968	United States of America	North Carolina
2019-10-10 21:47:00	2019-10-10 21:49:00	100	137	TRUE	2019-10-10 21:49:00	EN	Sometimes (once or twice a month)	Grocery store,Restaurant	Vaguely familiar	Moderately concerned	Very concerned	Very concerned	Very concerned	Extremely concerned	Extremely likely	No	1963	United States of America	North Carolina
2019-10-10 21:48:00	2019-10-10 21:51:00	100	214	TRUE	2019-10-10 21:51:00	EN	Sometimes (once or twice a month)	Grocery store,Restaurant	Very familiar	Moderately concerned	Very concerned	Very concerned	Moderately concerned	Moderately concerned	Somewhat likely	No	1991	United States of America	California
2019-10-10 22:06:00	2019-10-10 22:08:00	100	77	TRUE	2019-10-10 22:08:00	EN	Sometimes (once or twice a month)	Grocery store,Restaurant	Vaguely familiar	Moderately concerned	Slightly concerned	Moderately concerned	Extremely concerned	Very concerned	Extremely likely	No	1997	United States of America	North Carolina
2019-10-10 22:07:00	2019-10-10 22:10:00	100	189	TRUE	2019-10-10 22:10:00	EN	Sometimes (once or twice a month)	Restaurant	Never heard of it	Moderately concerned	Extremely concerned	Very concerned	Extremely concerned	Very concerned	Somewhat likely	No	1978	United States of America	North Carolina
2019-10-10 22:10:00	2019-10-10 22:13:00	100	126	TRUE	2019-10-10 22:13:00	EN	Sometimes (once or twice a month)	Restaurant	Never heard of it	Moderately concerned	Very concerned	Moderately concerned	Moderately concerned	Very concerned	Neither likely nor unlikely	No	1967	United States of America	Texas
2019-10-10 22:13:00	2019-10-10 22:15:00	100	118	TRUE	2019-10-10 22:15:00	EN	Sometimes (once or twice a month)	Seafood market,Grocery store	Never heard of it	Moderately concerned	Very concerned	Very concerned	Very concerned	Very concerned	Extremely likely	No	1986	United States of America	North Carolina
2019-10-10 22:14:00	2019-10-10 22:17:00	100	142	TRUE	2019-10-10 22:17:00	EN	Often (once a week)	Grocery store	Vaguely familiar	Moderately concerned	Moderately concerned	Moderately concerned	Very concerned	Very concerned	Extremely likely	No	1966	United States of America	North Carolina
2019-10-10 22:15:00	2019-10-10 22:19:00	100	212	TRUE	2019-10-10 22:19:00	EN	Sometimes (once or twice a month)	Restaurant	Never heard of it	Moderately concerned	Extremely concerned	Moderately concerned	Very concerned	Extremely concerned	Neither likely nor unlikely	No	1984	United States of America	North Carolina
2019-10-10 22:19:00	2019-10-10 22:21:00	100	116	TRUE	2019-10-10 22:21:00	EN	Seldom (once or twice a year)	Seafood market	Vaguely familiar	Moderately concerned	Very concerned	Moderately concerned	Very concerned	Very concerned	Somewhat unlikely	No	1995	United States of America	North Carolina
2019-10-10 22:35:00	2019-10-10 22:36:00	100	101	TRUE	2019-10-10 22:36:00	EN	Very often (several times per week)	Other	Never heard of it	Moderately concerned	Extremely concerned	Extremely concerned	Extremely concerned	Slightly concerned	Extremely likely	Yes	2000	United States of America	North Carolina
2019-10-10 22:43:00	2019-10-10 22:46:00	100	148	TRUE	2019-10-10 22:46:00	EN	Seldom (once or twice a year)	Grocery store,Restaurant	Vaguely familiar	Moderately concerned	Extremely concerned	Moderately concerned	Very concerned	Very concerned	Neither likely nor unlikely	Yes	2001	United States of America	North Carolina
2019-10-10 22:53:00	2019-10-10 22:55:00	100	128	TRUE	2019-10-10 22:55:00	EN	Often (once a week)	Grocery store	Vaguely familiar	Moderately concerned	Moderately concerned	Very concerned	Very concerned	Very concerned	Somewhat likely	No	1995	United States of America	North Carolina
2019-10-10 22:58:00	2019-10-10 23:00:00	100	141	TRUE	2019-10-10 23:00:00	EN	Sometimes (once or twice a month)	Restaurant	Never heard of it	Moderately concerned	Extremely concerned	Slightly concerned	Very concerned	Slightly concerned	Somewhat likely	Yes	1997	United States of America	North Carolina
2019-10-10 23:08:00	2019-10-10 23:10:00	100	139	TRUE	2019-10-10 23:10:00	EN	Sometimes (once or twice a month)	Grocery store,Restaurant	Never heard of it	Moderately concerned	Very concerned	Very concerned	Extremely concerned	Moderately concerned	Extremely likely	Yes	1998	United States of America	South Carolina
2019-10-10 23:38:00	2019-10-10 23:39:00	100	92	TRUE	2019-10-10 23:39:00	EN	Often (once a week)	Restaurant	Vaguely familiar	Moderately concerned	Extremely concerned	Moderately concerned	Very concerned	Extremely concerned	Somewhat likely	Yes	1996-12-30	United States of America	North Carolina
2019-10-10 23:47:00	2019-10-10 23:50:00	100	146	TRUE	2019-10-10 23:50:00	EN	Sometimes (once or twice a month)	Grocery store	Never heard of it	Moderately concerned	Extremely concerned	Extremely concerned	Moderately concerned	Extremely concerned	Extremely unlikely	Yes	1998	United States of America	South Carolina
2019-10-10 23:57:00	2019-10-11	100	131	TRUE	2019-10-11	EN	Seldom (once or twice a year)	Restaurant	Never heard of it	Moderately concerned	Slightly concerned	Slightly concerned	Not at all concerned	Extremely concerned	Neither likely nor unlikely	No	1996	United States of America	North Carolina
2019-10-11	2019-10-11 00:02:00	100	154	TRUE	2019-10-11 00:02:00	EN	Sometimes (once or twice a month)	Grocery store	Vaguely familiar	Moderately concerned	Very concerned	Moderately concerned	Very concerned	Very concerned	Somewhat likely	Yes	1997	United States of America	North Carolina
2019-10-11 00:16:00	2019-10-11 00:18:00	100	113	TRUE	2019-10-11 00:18:00	EN	Sometimes (once or twice a month)	Restaurant	Never heard of it	Moderately concerned	Not at all concerned	Very concerned	Extremely concerned	Very concerned	Somewhat likely	No	1995	United States of America	North Carolina
2019-10-11 00:48:00	2019-10-11 00:49:00	100	110	TRUE	2019-10-11 00:49:00	EN	Sometimes (once or twice a month)	Grocery store,Restaurant	Never heard of it	Moderately concerned	Not at all concerned	Moderately concerned	Moderately concerned	Very concerned	Somewhat likely	Yes	1999	United States of America	Oklahoma
2019-10-11 02:25:00	2019-10-11 02:28:00	100	155	TRUE	2019-10-11 02:28:00	EN	Sometimes (once or twice a month)	Grocery store,Restaurant	Vaguely familiar	Moderately concerned	Moderately concerned	Very concerned	Very concerned	Not at all concerned	Somewhat likely	Yes	1992	United States of America	California
2019-10-11 02:32:00	2019-10-11 02:35:00	100	169	TRUE	2019-10-11 02:35:00	EN	Seldom (once or twice a year)	Restaurant	Vaguely familiar	Moderately concerned	Extremely concerned	Not at all concerned	Extremely concerned	Extremely concerned	Neither likely nor unlikely	No	1987	United States of America	North Carolina
2019-10-11 03:00:00	2019-10-11 03:01:00	100	99	TRUE	2019-10-11 03:01:00	EN	Sometimes (once or twice a month)	Restaurant	Very familiar	Moderately concerned	Slightly concerned	Moderately concerned	Moderately concerned	Slightly concerned	Somewhat likely	No	1996	United States of America	California
2019-10-11 05:32:00	2019-10-11 05:33:00	100	103	TRUE	2019-10-11 05:33:00	EN	Sometimes (once or twice a month)	Restaurant	Never heard of it	Moderately concerned	Slightly concerned	Slightly concerned	Slightly concerned	Moderately concerned	Neither likely nor unlikely	Yes	2001	United States of America	West Virginia
2019-10-11 06:43:00	2019-10-11 06:45:00	100	128	TRUE	2019-10-11 06:45:00	EN	Sometimes (once or twice a month)	Restaurant	Vaguely familiar	Moderately concerned	Slightly concerned	Not at all concerned	Moderately concerned	Moderately concerned	Somewhat likely	Yes	1999	United States of America	North Carolina
2019-10-11 07:14:00	2019-10-11 07:17:00	100	162	TRUE	2019-10-11 07:17:00	EN	Seldom (once or twice a year)	Restaurant	Never heard of it	Moderately concerned	Moderately concerned	Slightly concerned	Moderately concerned	Slightly concerned	Somewhat likely	Yes	2000	United States of America	North Carolina
2019-10-11 07:27:00	2019-10-11 07:29:00	100	138	TRUE	2019-10-11 07:29:00	EN	Sometimes (once or twice a month)	Restaurant	Never heard of it	Moderately concerned	Moderately concerned	Moderately concerned	Very concerned	Very concerned	Neither likely nor unlikely	Yes	2000	United States of America	North Carolina
2019-10-11 08:08:00	2019-10-11 08:10:00	100	177	TRUE	2019-10-11 08:10:00	EN	Very often (several times per week)	Seafood market	Vaguely familiar	Moderately concerned	Slightly concerned	Very concerned	Very concerned	Moderately concerned	Somewhat likely	No	1969	United States of America	North Carolina
2019-10-11 08:19:00	2019-10-11 08:22:00	100	167	TRUE	2019-10-11 08:22:00	EN	Sometimes (once or twice a month)	Grocery store,Restaurant	Never heard of it	Moderately concerned	Very concerned	Very concerned	Extremely concerned	Extremely concerned	Extremely likely	No	1950	United States of America	North Carolina
2019-10-11 08:24:00	2019-10-11 08:26:00	100	95	TRUE	2019-10-11 08:26:00	EN	Often (once a week)	Grocery store	Vaguely familiar	Moderately concerned	Extremely concerned	Very concerned	Extremely concerned	Very concerned	Somewhat likely	Yes	1994	United States of America	Georgia
2019-10-11 08:59:00	2019-10-11 09:01:00	100	136	TRUE	2019-10-11 09:01:00	EN	Sometimes (once or twice a month)	Restaurant	Never heard of it	Moderately concerned	Not at all concerned	Very concerned	Moderately concerned	Extremely concerned	Extremely likely	Yes	1999	United States of America	North Carolina
2019-10-11 08:59:00	2019-10-11 09:04:00	100	296	TRUE	2019-10-11 09:04:00	EN	Seldom (once or twice a year)	I do not purchase seafood	Never heard of it	Moderately concerned	Moderately concerned	Moderately concerned	Moderately concerned	Moderately concerned	Somewhat likely	No	1950	United States of America	New York
2019-10-11 09:09:00	2019-10-11 09:11:00	100	132	TRUE	2019-10-11 09:11:00	EN	Sometimes (once or twice a month)	Grocery store,Restaurant	Never heard of it	Moderately concerned	Very concerned	Moderately concerned	Extremely concerned	Very concerned	Somewhat likely	Yes	1996	United States of America	North Carolina
2019-10-11 09:20:00	2019-10-11 09:22:00	100	80	TRUE	2019-10-11 09:22:00	EN	Seldom (once or twice a year)	Restaurant	Vaguely familiar	Moderately concerned	Not at all concerned	Extremely concerned	Extremely concerned	Moderately concerned	Somewhat likely	Yes	1995	United States of America	Massachusetts
2019-10-11 09:23:00	2019-10-11 09:24:00	100	91	TRUE	2019-10-11 09:24:00	EN	Sometimes (once or twice a month)	Grocery store,Restaurant	Very familiar	Moderately concerned	Very concerned	Very concerned	Extremely concerned	Very concerned	Somewhat likely	No	1997	United States of America	North Carolina
2019-10-11 09:24:00	2019-10-11 09:26:00	100	112	TRUE	2019-10-11 09:26:00	EN	Often (once a week)	Grocery store,Restaurant	Vaguely familiar	Moderately concerned	Very concerned	Very concerned	Very concerned	Slightly concerned	Somewhat likely	No	1992	United States of America	North Carolina
2019-10-11 09:26:00	2019-10-11 09:28:00	100	134	TRUE	2019-10-11 09:28:00	EN	Often (once a week)	Restaurant	Very familiar	Moderately concerned	Extremely concerned	Very concerned	Extremely concerned	Slightly concerned	Somewhat likely	No	1977	United States of America	Michigan
2019-10-11 09:26:00	2019-10-11 09:30:00	100	229	TRUE	2019-10-11 09:30:00	EN	Very often (several times per week)	Restaurant	Very familiar	Moderately concerned	Extremely concerned	Moderately concerned	Very concerned	Moderately concerned	Extremely likely	No	1978	Mexico
2019-10-11 09:29:00	2019-10-11 09:30:00	100	81	TRUE	2019-10-11 09:30:00	EN	Sometimes (once or twice a month)	Grocery store	Vaguely familiar	Moderately concerned	Very concerned	Very concerned	Very concerned	Very concerned	Extremely likely	Yes	1981	United States of America	North Carolina
2019-10-11 09:29:00	2019-10-11 09:31:00	100	100	TRUE	2019-10-11 09:31:00	EN	Sometimes (once or twice a month)	Grocery store,Restaurant	Very familiar	Moderately concerned	Very concerned	Very concerned	Extremely concerned	Very concerned	Somewhat unlikely	No	1990	United States of America	Pennsylvania
2019-10-11 09:27:00	2019-10-11 09:31:00	100	254	TRUE	2019-10-11 09:31:00	EN	Sometimes (once or twice a month)	Seafood market,Grocery store,Restaurant	Vaguely familiar	Moderately concerned	Slightly concerned	Very concerned	Very concerned	Moderately concerned	Somewhat likely	No	1974	United States of America	North Carolina
2019-10-11 09:28:00	2019-10-11 09:36:00	100	482	TRUE	2019-10-11 09:36:00	EN	Never	I do not purchase seafood	Vaguely familiar	Moderately concerned	Very concerned	Very concerned	Extremely concerned	Moderately concerned	Extremely likely	Yes	1986	Italy
2019-10-11 09:35:00	2019-10-11 09:37:00	100	143	TRUE	2019-10-11 09:37:00	EN	Often (once a week)	Grocery store	Never heard of it	Moderately concerned	Extremely concerned	Slightly concerned	Slightly concerned	Slightly concerned	Somewhat likely	No	1982	United States of America	North Carolina
2019-10-11 09:36:00	2019-10-11 09:39:00	100	135	TRUE	2019-10-11 09:39:00	EN	Sometimes (once or twice a month)	Grocery store,Restaurant	Vaguely familiar	Moderately concerned	Moderately concerned	Moderately concerned	Moderately concerned	Moderately concerned	Somewhat likely	No	1983	United States of America	North Carolina
2019-10-11 09:48:00	2019-10-11 09:50:00	100	154	TRUE	2019-10-11 09:50:00	EN	Often (once a week)	Grocery store,Restaurant	Never heard of it	Moderately concerned	Extremely concerned	Moderately concerned	Very concerned	Slightly concerned	Neither likely nor unlikely	No	1983	United States of America	North Carolina
2019-10-11 09:50:00	2019-10-11 09:52:00	100	111	TRUE	2019-10-11 09:52:00	EN	Very often (several times per week)	Restaurant	Vaguely familiar	Moderately concerned	Extremely concerned	Slightly concerned	Very concerned	Very concerned	Extremely likely	No	1978	United States of America	North Carolina
2019-10-11 09:54:00	2019-10-11 09:55:00	100	87	TRUE	2019-10-11 09:55:00	EN	Sometimes (once or twice a month)	Grocery store,Restaurant	Vaguely familiar	Moderately concerned	Extremely concerned	Very concerned	Very concerned	Very concerned	Neither likely nor unlikely	No	1985	United States of America	North Carolina
2019-10-11 09:56:00	2019-10-11 09:57:00	100	117	TRUE	2019-10-11 09:57:00	EN	Very often (several times per week)	Grocery store,Restaurant	Vaguely familiar	Moderately concerned	Moderately concerned	Moderately concerned	Very concerned	Slightly concerned	Somewhat likely	No	1953	United States of America	North Carolina
2019-10-11 09:54:00	2019-10-11 09:58:00	100	199	TRUE	2019-10-11 09:58:00	EN	Sometimes (once or twice a month)	Grocery store,Restaurant	Never heard of it	Moderately concerned	Extremely concerned	Very concerned	Very concerned	Very concerned	Somewhat likely	No	1962	United States of America	North Carolina
2019-10-11 09:57:00	2019-10-11 09:59:00	100	132	TRUE	2019-10-11 09:59:00	EN	Sometimes (once or twice a month)	Restaurant	Vaguely familiar	Moderately concerned	Not at all concerned	Moderately concerned	Very concerned	Slightly concerned	Somewhat unlikely	Yes	1996	United States of America	North Carolina
2019-10-11 09:59:00	2019-10-11 10:00:00	100	101	TRUE	2019-10-11 10:00:00	EN	Sometimes (once or twice a month)	Grocery store	Vaguely familiar	Moderately concerned	Slightly concerned	Moderately concerned	Very concerned	Very concerned	Extremely likely	No	1966	United States of America	North Carolina
2019-10-11 10:06:00	2019-10-11 10:08:00	100	117	TRUE	2019-10-11 10:08:00	EN	Sometimes (once or twice a month)	Grocery store	Never heard of it	Moderately concerned	Slightly concerned	Slightly concerned	Moderately concerned	Moderately concerned	Neither likely nor unlikely	No	1982	United States of America	North Carolina
2019-10-11 10:08:00	2019-10-11 10:11:00	100	127	TRUE	2019-10-11 10:11:00	EN	Very often (several times per week)	Grocery store	Vaguely familiar	Moderately concerned	Not at all concerned	Moderately concerned	Very concerned	Very concerned	Somewhat likely	Yes	1995	United States of America	North Carolina
2019-10-11 10:11:00	2019-10-11 10:12:00	100	85	TRUE	2019-10-11 10:12:00	EN	Sometimes (once or twice a month)	Grocery store,Restaurant	Vaguely familiar	Moderately concerned	Very concerned	Very concerned	Very concerned	Moderately concerned	Extremely likely	No	1974	United States of America	North Carolina
2019-10-11 10:14:00	2019-10-11 10:16:00	100	113	TRUE	2019-10-11 10:16:00	EN	Often (once a week)	Grocery store	Vaguely familiar	Moderately concerned	Moderately concerned	Slightly concerned	Very concerned	Slightly concerned	Somewhat likely	No	1982	United States of America	New York
2019-10-11 10:16:00	2019-10-11 10:18:00	100	146	TRUE	2019-10-11 10:18:00	EN	Often (once a week)	Grocery store	Vaguely familiar	Moderately concerned	Extremely concerned	Very concerned	Very concerned	Moderately concerned	Extremely likely	No	1974	United States of America	North Carolina
2019-10-11 10:17:00	2019-10-11 10:19:00	100	84	TRUE	2019-10-11 10:19:00	EN	Sometimes (once or twice a month)	Grocery store	Vaguely familiar	Moderately concerned	Very concerned	Very concerned	Very concerned	Moderately concerned	Somewhat likely	No	1982	United States of America	North Carolina
2019-10-11 10:21:00	2019-10-11 10:22:00	100	79	TRUE	2019-10-11 10:22:00	EN	Often (once a week)	Grocery store,Restaurant	Vaguely familiar	Moderately concerned	Slightly concerned	Moderately concerned	Moderately concerned	Moderately concerned	Somewhat likely	Yes	1984	United States of America	North Carolina
2019-10-11 10:28:00	2019-10-11 10:31:00	100	152	TRUE	2019-10-11 10:31:00	EN	Often (once a week)	Restaurant	Never heard of it	Moderately concerned	Slightly concerned	Moderately concerned	Very concerned	Moderately concerned	Somewhat likely	No	1979	United States of America	Colorado
2019-10-11 10:29:00	2019-10-11 10:33:00	100	208	TRUE	2019-10-11 10:33:00	EN	Often (once a week)	Seafood market,Grocery store,Restaurant	Vaguely familiar	Moderately concerned	Moderately concerned	Very concerned	Extremely concerned	Moderately concerned	Somewhat likely	No	1950	United States of America	North Carolina
2019-10-11 10:30:00	2019-10-11 10:33:00	100	158	TRUE	2019-10-11 10:33:00	EN	Sometimes (once or twice a month)	Grocery store	Very familiar	Moderately concerned	Slightly concerned	Very concerned	Very concerned	Slightly concerned	Somewhat likely	Yes	1986	United States of America	California
2019-10-11 10:34:00	2019-10-11 10:36:00	100	136	TRUE	2019-10-11 10:36:00	EN	Seldom (once or twice a year)	Grocery store,Restaurant	Vaguely familiar	Moderately concerned	Very concerned	Slightly concerned	Very concerned	Moderately concerned	Somewhat likely	No	1964	United States of America	North Carolina
2019-10-11 10:40:00	2019-10-11 10:42:00	100	89	TRUE	2019-10-11 10:42:00	EN	Sometimes (once or twice a month)	Restaurant	Vaguely familiar	Moderately concerned	Very concerned	Very concerned	Very concerned	Moderately concerned	Somewhat likely	No	1990	United States of America	North Carolina
2019-10-11 10:43:00	2019-10-11 10:44:00	100	105	TRUE	2019-10-11 10:44:00	EN	Sometimes (once or twice a month)	Seafood market,Grocery store	Vaguely familiar	Moderately concerned	Slightly concerned	Moderately concerned	Moderately concerned	Moderately concerned	Extremely likely	No	1979	United States of America	North Carolina
2019-10-11 10:55:00	2019-10-11 10:57:00	100	112	TRUE	2019-10-11 10:57:00	EN	Very often (several times per week)	I do not purchase seafood	Vaguely familiar	Moderately concerned	Moderately concerned	Moderately concerned	Very concerned	Moderately concerned	Somewhat likely	No	1939	United States of America	North Carolina
2019-10-11 10:59:00	2019-10-11 11:00:00	100	83	TRUE	2019-10-11 11:00:00	EN	Sometimes (once or twice a month)	Restaurant,Other	Very familiar	Moderately concerned	Not at all concerned	Very concerned	Moderately concerned	Very concerned	Extremely likely	Yes	1996	United States of America	Rhode Island
2019-10-11 10:58:00	2019-10-11 11:01:00	100	166	TRUE	2019-10-11 11:01:00	EN	Often (once a week)	Grocery store	Never heard of it	Moderately concerned	Not at all concerned	Moderately concerned	Very concerned	Very concerned	Neither likely nor unlikely	No	1961-04-15	United States of America	Florida
2019-10-11 11:06:00	2019-10-11 11:08:00	100	126	TRUE	2019-10-11 11:08:00	EN	Sometimes (once or twice a month)	Grocery store	Vaguely familiar	Moderately concerned	Moderately concerned	Very concerned	Very concerned	Very concerned	Somewhat likely	Yes	1998	United States of America	Hawaii
2019-10-11 11:17:00	2019-10-11 11:18:00	100	77	TRUE	2019-10-11 11:18:00	EN	Sometimes (once or twice a month)	Grocery store,Restaurant	Vaguely familiar	Moderately concerned	Extremely concerned	Moderately concerned	Very concerned	Slightly concerned	Somewhat likely	No	1989	United States of America	North Carolina
2019-10-11 11:25:00	2019-10-11 11:27:00	100	98	TRUE	2019-10-11 11:27:00	EN	Often (once a week)	Grocery store	Never heard of it	Moderately concerned	Slightly concerned	Very concerned	Extremely concerned	Moderately concerned	Extremely likely	No	1990	United States of America	New York
2019-10-11 11:33:00	2019-10-11 11:35:00	100	111	TRUE	2019-10-11 11:35:00	EN	Sometimes (once or twice a month)	Seafood market,Grocery store,Restaurant	Vaguely familiar	Moderately concerned	Slightly concerned	Very concerned	Very concerned	Slightly concerned	Extremely likely	No	1964	United States of America	North Carolina
2019-10-11 11:39:00	2019-10-11 11:42:00	100	162	TRUE	2019-10-11 11:42:00	EN	Sometimes (once or twice a month)	Grocery store,Restaurant	Vaguely familiar	Moderately concerned	Moderately concerned	Moderately concerned	Extremely concerned	Very concerned	Extremely likely	No	1964	United States of America	North Carolina
2019-10-11 11:40:00	2019-10-11 11:42:00	100	102	TRUE	2019-10-11 11:42:00	EN	Often (once a week)	Grocery store,Restaurant	Very familiar	Moderately concerned	Very concerned	Very concerned	Extremely concerned	Moderately concerned	Somewhat likely	Yes	1995	United States of America	North Carolina
2019-10-11 11:44:00	2019-10-11 11:46:00	100	123	TRUE	2019-10-11 11:46:00	EN	Sometimes (once or twice a month)	Grocery store,Restaurant	Never heard of it	Moderately concerned	Very concerned	Very concerned	Extremely concerned	Very concerned	Extremely likely	Yes	2000	United States of America	Texas
2019-10-11 11:44:00	2019-10-11 11:46:00	100	151	TRUE	2019-10-11 11:46:00	EN	Very often (several times per week)	Grocery store	Vaguely familiar	Moderately concerned	Not at all concerned	Very concerned	Extremely concerned	Very concerned	Extremely likely	No	1981	United States of America	Virginia
2019-10-11 11:56:00	2019-10-11 11:58:00	100	84	TRUE	2019-10-11 11:58:00	EN	Sometimes (once or twice a month)	Grocery store	Vaguely familiar	Moderately concerned	Moderately concerned	Very concerned	Extremely concerned	Very concerned	Neither likely nor unlikely	Yes	1979	United States of America	Pennsylvania
2019-10-11 12:02:00	2019-10-11 12:03:00	100	62	TRUE	2019-10-11 12:03:00	EN	Sometimes (once or twice a month)	Grocery store,Restaurant	Vaguely familiar	Moderately concerned	Very concerned	Moderately concerned	Extremely concerned	Moderately concerned	Somewhat likely	No	1994	United States of America	North Carolina
2019-10-11 12:04:00	2019-10-11 12:06:00	100	146	TRUE	2019-10-11 12:06:00	EN	Very often (several times per week)	Seafood market	Very familiar	Moderately concerned	Moderately concerned	Very concerned	Very concerned	Very concerned	Extremely likely	No	1954	United States of America	South Carolina
2019-10-11 12:09:00	2019-10-11 12:11:00	100	152	TRUE	2019-10-11 12:11:00	EN	Often (once a week)	Seafood market,Grocery store,Restaurant,Other	Very familiar	Moderately concerned	Moderately concerned	Moderately concerned	Extremely concerned	Very concerned	Somewhat likely	No	1949	United States of America	Pennsylvania
2019-10-11 12:09:00	2019-10-11 12:11:00	100	156	TRUE	2019-10-11 12:11:00	EN	Never	I do not purchase seafood	Never heard of it	Moderately concerned	Moderately concerned	Slightly concerned	Moderately concerned	Slightly concerned	Somewhat likely	Yes	1999	United States of America	North Carolina
2019-10-11 12:14:00	2019-10-11 12:15:00	100	77	TRUE	2019-10-11 12:15:00	EN	Often (once a week)	Seafood market,Grocery store,Restaurant	Very familiar	Moderately concerned	Moderately concerned	Extremely concerned	Extremely concerned	Moderately concerned	Extremely likely	Yes	1991	United States of America	North Carolina
2019-10-11 12:31:00	2019-10-11 12:32:00	100	91	TRUE	2019-10-11 12:32:00	EN	Often (once a week)	Grocery store,Restaurant	Vaguely familiar	Moderately concerned	Moderately concerned	Slightly concerned	Slightly concerned	Moderately concerned	Neither likely nor unlikely	No	1981	United States of America	Texas
2019-10-11 12:49:00	2019-10-11 12:54:00	100	284	TRUE	2019-10-11 12:54:00	EN	Often (once a week)	Grocery store,Restaurant	Vaguely familiar	Moderately concerned	Not at all concerned	Slightly concerned	Extremely concerned	Slightly concerned	Somewhat likely	No	1995	United States of America	Colorado
2019-10-11 12:55:00	2019-10-11 12:57:00	100	151	TRUE	2019-10-11 12:57:00	EN	Often (once a week)	Grocery store,Restaurant	Vaguely familiar	Moderately concerned	Extremely concerned	Very concerned	Extremely concerned	Very concerned	Extremely likely	No	1952	United States of America	North Carolina
2019-10-11 12:56:00	2019-10-11 12:59:00	100	135	TRUE	2019-10-11 12:59:00	EN	Sometimes (once or twice a month)	Seafood market,Grocery store	Vaguely familiar	Moderately concerned	Extremely concerned	Moderately concerned	Extremely concerned	Extremely concerned	Somewhat likely	No	1968	United States of America	Georgia
2019-10-11 13:09:00	2019-10-11 13:10:00	100	94	TRUE	2019-10-11 13:10:00	EN	Often (once a week)	Grocery store,Restaurant	Very familiar	Moderately concerned	Slightly concerned	Very concerned	Extremely concerned	Not at all concerned	Extremely likely	Yes	1995	United States of America	California
2019-10-11 13:09:00	2019-10-11 13:11:00	100	115	TRUE	2019-10-11 13:11:00	EN	Very often (several times per week)	Grocery store	Vaguely familiar	Moderately concerned	Slightly concerned	Moderately concerned	Very concerned	Moderately concerned	Somewhat likely	No	1946	United States of America	North Carolina
2019-10-11 13:55:00	2019-10-11 13:58:00	100	140	TRUE	2019-10-11 13:58:00	EN	Sometimes (once or twice a month)	I do not purchase seafood	Never heard of it	Moderately concerned	Slightly concerned	Slightly concerned	Very concerned	Moderately concerned	Extremely likely	Yes	1998	United States of America	North Carolina
2019-10-11 14:00:00	2019-10-11 14:03:00	100	124	TRUE	2019-10-11 14:03:00	EN	Sometimes (once or twice a month)	Grocery store	Never heard of it	Moderately concerned	Extremely concerned	Very concerned	Extremely concerned	Slightly concerned	Extremely likely	Yes	1996	United States of America	North Carolina
2019-10-11 14:02:00	2019-10-11 14:05:00	100	192	TRUE	2019-10-11 14:05:00	EN	Sometimes (once or twice a month)	Restaurant	Vaguely familiar	Moderately concerned	Not at all concerned	Moderately concerned	Very concerned	Extremely concerned	Somewhat likely	Yes	2000	United States of America	North Carolina
2019-10-11 14:09:00	2019-10-11 14:12:00	100	137	TRUE	2019-10-11 14:12:00	EN	Often (once a week)	Seafood market	Vaguely familiar	Moderately concerned	Moderately concerned	Very concerned	Very concerned	Very concerned	Extremely likely	No	1964	Norway
2019-10-11 14:11:00	2019-10-11 14:14:00	100	153	TRUE	2019-10-11 14:14:00	EN	Sometimes (once or twice a month)	Grocery store	Never heard of it	Moderately concerned	Moderately concerned	Moderately concerned	Moderately concerned	Moderately concerned	Somewhat unlikely	No	1979	United States of America	North Carolina
2019-10-11 14:11:00	2019-10-11 14:14:00	100	184	TRUE	2019-10-11 14:14:00	EN	Sometimes (once or twice a month)	Restaurant	Never heard of it	Moderately concerned	Extremely concerned	Moderately concerned	Extremely concerned	Moderately concerned	Somewhat likely	Yes	1998	United States of America	North Carolina
2019-10-11 14:19:00	2019-10-11 14:22:00	100	134	TRUE	2019-10-11 14:22:00	EN	Often (once a week)	Seafood market,Grocery store,Restaurant	Never heard of it	Moderately concerned	Extremely concerned	Extremely concerned	Extremely concerned	Extremely concerned	Somewhat likely	No	1959	United States of America	North Carolina
2019-10-11 14:27:00	2019-10-11 14:29:00	100	133	TRUE	2019-10-11 14:29:00	EN	Sometimes (once or twice a month)	Grocery store	Never heard of it	Moderately concerned	Very concerned	Moderately concerned	Very concerned	Moderately concerned	Neither likely nor unlikely	No	1960	United States of America	North Carolina
2019-10-11 14:48:00	2019-10-11 14:50:00	100	111	TRUE	2019-10-11 14:50:00	EN	Seldom (once or twice a year)	Restaurant	Vaguely familiar	Moderately concerned	Very concerned	Very concerned	Extremely concerned	Slightly concerned	Extremely likely	Yes	1990	United States of America	North Carolina
2019-10-11 15:14:00	2019-10-11 15:18:00	100	182	TRUE	2019-10-11 15:18:00	EN	Often (once a week)	Grocery store	Very familiar	Moderately concerned	Slightly concerned	Moderately concerned	Moderately concerned	Slightly concerned	Somewhat likely	No	1968	United States of America	North Carolina
2019-10-11 15:19:00	2019-10-11 15:21:00	100	123	TRUE	2019-10-11 15:21:00	EN	Sometimes (once or twice a month)	Seafood market	Never heard of it	Moderately concerned	Moderately concerned	Slightly concerned	Slightly concerned	Slightly concerned	Extremely likely	No	1939	United States of America	Rhode Island
2019-10-11 15:21:00	2019-10-11 15:24:00	100	180	TRUE	2019-10-11 15:24:00	EN	Seldom (once or twice a year)	I do not purchase seafood	Very familiar	Moderately concerned	Moderately concerned	Moderately concerned	Extremely concerned	Moderately concerned	Somewhat likely	Yes	1994	United States of America	North Carolina
2019-10-11 15:37:00	2019-10-11 15:39:00	100	114	TRUE	2019-10-11 15:39:00	EN	Seldom (once or twice a year)	Restaurant	Vaguely familiar	Moderately concerned	Extremely concerned	Moderately concerned	Extremely concerned	Extremely concerned	Extremely likely	No	1962	United States of America	Minnesota
2019-10-11 15:49:00	2019-10-11 15:51:00	100	118	TRUE	2019-10-11 15:51:00	EN	Very often (several times per week)	Grocery store	Never heard of it	Moderately concerned	Moderately concerned	Extremely concerned	Extremely concerned	Moderately concerned	Extremely likely	No	1983	United States of America	Texas
2019-10-11 15:50:00	2019-10-11 15:53:00	100	121	TRUE	2019-10-11 15:53:00	EN	Often (once a week)	Grocery store	Never heard of it	Moderately concerned	Extremely concerned	Very concerned	Extremely concerned	Extremely concerned	Somewhat likely	No	1990	United States of America	California
2019-10-11 15:50:00	2019-10-11 15:54:00	100	181	TRUE	2019-10-11 15:54:00	EN	Often (once a week)	Grocery store,Restaurant	Never heard of it	Moderately concerned	Moderately concerned	Slightly concerned	Very concerned	Very concerned	Extremely likely	No	1946	United States of America	Virginia
2019-10-11 15:52:00	2019-10-11 15:55:00	100	207	TRUE	2019-10-11 15:55:00	EN	Often (once a week)	Seafood market	Vaguely familiar	Moderately concerned	Moderately concerned	Very concerned	Extremely concerned	Moderately concerned	Extremely likely	No	1954	United States of America	Florida
2019-10-11 15:57:00	2019-10-11 16:00:00	100	147	TRUE	2019-10-11 16:00:00	EN	Often (once a week)	Restaurant	Vaguely familiar	Moderately concerned	Moderately concerned	Moderately concerned	Very concerned	Very concerned	Somewhat likely	No	1975	United States of America	Illinois
2019-10-11 16:00:00	2019-10-11 16:02:00	100	128	TRUE	2019-10-11 16:02:00	EN	Sometimes (once or twice a month)	Grocery store,Restaurant	Never heard of it	Moderately concerned	Very concerned	Moderately concerned	Moderately concerned	Extremely concerned	Extremely likely	Yes	1993	United States of America	North Carolina
2019-10-11 15:59:00	2019-10-11 16:03:00	100	216	TRUE	2019-10-11 16:03:00	EN	Often (once a week)	Seafood market,Grocery store,Restaurant	Very familiar	Moderately concerned	Slightly concerned	Slightly concerned	Very concerned	Very concerned	Extremely likely	No	1942	United States of America	North Carolina
2019-10-11 16:01:00	2019-10-11 16:03:00	100	99	TRUE	2019-10-11 16:03:00	EN	Sometimes (once or twice a month)	Grocery store	Vaguely familiar	Moderately concerned	Extremely concerned	Very concerned	Extremely concerned	Moderately concerned	Extremely likely	No	1965	United States of America	Massachusetts
2019-10-11 16:05:00	2019-10-11 16:07:00	100	133	TRUE	2019-10-11 16:07:00	EN	Often (once a week)	Grocery store,Restaurant	Very familiar	Moderately concerned	Not at all concerned	Slightly concerned	Very concerned	Very concerned	Extremely likely	No	1977	United States of America	District of Columbia
2019-10-11 16:24:00	2019-10-11 16:27:00	100	140	TRUE	2019-10-11 16:27:00	EN	Often (once a week)	I do not purchase seafood	Very familiar	Moderately concerned	Slightly concerned	Moderately concerned	Extremely concerned	Not at all concerned	Extremely likely	No	1991	United States of America	Louisiana
2019-10-11 16:25:00	2019-10-11 16:27:00	100	101	TRUE	2019-10-11 16:27:00	EN	Very often (several times per week)	Restaurant,I do not purchase seafood	Never heard of it	Moderately concerned	Slightly concerned	Very concerned	Moderately concerned	Extremely concerned	Somewhat unlikely	Yes	2001	United States of America	North Carolina
2019-10-11 16:29:00	2019-10-11 16:32:00	100	142	TRUE	2019-10-11 16:32:00	EN	Often (once a week)	Grocery store	Never heard of it	Moderately concerned	Moderately concerned	Moderately concerned	Very concerned	Extremely concerned	Somewhat likely	Yes	1992	United States of America	Michigan
2019-10-11 16:31:00	2019-10-11 16:33:00	100	93	TRUE	2019-10-11 16:33:00	EN	Often (once a week)	Restaurant	Vaguely familiar	Moderately concerned	Very concerned	Moderately concerned	Very concerned	Moderately concerned	Somewhat likely	No	1992	United States of America	Maryland
2019-10-11 16:34:00	2019-10-11 16:35:00	100	72	TRUE	2019-10-11 16:35:00	EN	Sometimes (once or twice a month)	Grocery store	Vaguely familiar	Moderately concerned	Very concerned	Extremely concerned	Extremely concerned	Slightly concerned	Extremely likely	Yes	2001	United States of America	North Carolina
2019-10-11 16:51:00	2019-10-11 16:52:00	100	102	TRUE	2019-10-11 16:52:00	EN	Never	I do not purchase seafood	Never heard of it	Moderately concerned	Slightly concerned	Very concerned	Very concerned	Slightly concerned	Neither likely nor unlikely	No	1960-02-22	United States of America	North Carolina
2019-10-11 16:57:00	2019-10-11 17:00:00	100	136	TRUE	2019-10-11 17:00:00	EN	Sometimes (once or twice a month)	Grocery store,Restaurant	Never heard of it	Moderately concerned	Very concerned	Moderately concerned	Moderately concerned	Very concerned	Somewhat likely	Yes	2000	United States of America	North Carolina
2019-10-11 17:00:00	2019-10-11 17:04:00	100	229	TRUE	2019-10-11 17:04:00	EN	Sometimes (once or twice a month)	Restaurant	Never heard of it	Moderately concerned	Very concerned	Moderately concerned	Very concerned	Very concerned	Somewhat likely	Yes	2001	United States of America	North Carolina
2019-10-11 17:07:00	2019-10-11 17:09:00	100	131	TRUE	2019-10-11 17:09:00	EN	Often (once a week)	Seafood market,Grocery store,Restaurant	Vaguely familiar	Moderately concerned	Slightly concerned	Extremely concerned	Very concerned	Moderately concerned	Somewhat likely	No	1971	United States of America	North Carolina
2019-10-11 17:11:00	2019-10-11 17:13:00	100	97	TRUE	2019-10-11 17:13:00	EN	Sometimes (once or twice a month)	Restaurant	Vaguely familiar	Moderately concerned	Very concerned	Slightly concerned	Moderately concerned	Very concerned	Somewhat likely	No	1970	United States of America	Wisconsin
2019-10-11 17:20:00	2019-10-11 17:23:00	100	167	TRUE	2019-10-11 17:23:00	EN	Often (once a week)	Other	Vaguely familiar	Moderately concerned	Slightly concerned	Not at all concerned	Moderately concerned	Moderately concerned	Somewhat unlikely	No	1963	United States of America	North Carolina
2019-10-11 17:26:00	2019-10-11 17:27:00	100	115	TRUE	2019-10-11 17:27:00	EN	Very often (several times per week)	Grocery store,Restaurant	Vaguely familiar	Moderately concerned	Not at all concerned	Slightly concerned	Slightly concerned	Very concerned	Somewhat likely	No	1960	United States of America	Idaho
2019-10-11 17:44:00	2019-10-11 17:46:00	100	126	TRUE	2019-10-11 17:46:00	EN	Often (once a week)	Grocery store	Vaguely familiar	Moderately concerned	Not at all concerned	Moderately concerned	Moderately concerned	Slightly concerned	Extremely likely	No	1966	United States of America	Virginia
2019-10-11 17:55:00	2019-10-11 17:58:00	100	162	TRUE	2019-10-11 17:58:00	EN	Very often (several times per week)	Seafood market,Grocery store,Restaurant	Vaguely familiar	Moderately concerned	Moderately concerned	Very concerned	Very concerned	Moderately concerned	Somewhat likely	No	1951	United States of America	North Carolina
2019-10-11 17:57:00	2019-10-11 17:59:00	100	100	TRUE	2019-10-11 17:59:00	EN	Often (once a week)	Seafood market,Restaurant	Never heard of it	Moderately concerned	Slightly concerned	Moderately concerned	Very concerned	Extremely concerned	Somewhat likely	No	1981	United States of America	North Carolina
2019-10-11 18:12:00	2019-10-11 18:15:00	100	200	TRUE	2019-10-11 18:15:00	EN	Very often (several times per week)	Seafood market,Grocery store,Restaurant	Vaguely familiar	Moderately concerned	Extremely concerned	Slightly concerned	Very concerned	Very concerned	Somewhat likely	No	1940	United States of America	North Carolina
2019-10-11 18:30:00	2019-10-11 18:32:00	100	132	TRUE	2019-10-11 18:32:00	EN	Often (once a week)	Grocery store,Restaurant	Vaguely familiar	Moderately concerned	Moderately concerned	Moderately concerned	Very concerned	Very concerned	Extremely likely	No	1966	United States of America	Virginia
2019-10-11 19:13:00	2019-10-11 19:16:00	100	177	TRUE	2019-10-11 19:16:00	EN	Often (once a week)	Grocery store	Never heard of it	Moderately concerned	Moderately concerned	Moderately concerned	Moderately concerned	Slightly concerned	Somewhat likely	No	1948	United States of America	North Carolina
2019-10-11 20:03:00	2019-10-11 20:05:00	100	104	TRUE	2019-10-11 20:05:00	EN	Sometimes (once or twice a month)	Restaurant	Never heard of it	Moderately concerned	Very concerned	Extremely concerned	Extremely concerned	Moderately concerned	Somewhat likely	No	1981	United States of America	District of Columbia
2019-10-11 20:06:00	2019-10-11 20:09:00	100	173	TRUE	2019-10-11 20:09:00	EN	Sometimes (once or twice a month)	Seafood market	Vaguely familiar	Moderately concerned	Slightly concerned	Slightly concerned	Very concerned	Slightly concerned	Somewhat likely	No	1945	United States of America	Massachusetts
2019-10-11 20:07:00	2019-10-11 20:13:00	100	352	TRUE	2019-10-11 20:13:00	EN	Often (once a week)	Grocery store,Restaurant	Never heard of it	Moderately concerned	Not at all concerned	Slightly concerned	Slightly concerned	Moderately concerned	Somewhat likely	No	1992	United States of America	Texas
2019-10-11 20:13:00	2019-10-11 20:15:00	100	131	TRUE	2019-10-11 20:15:00	EN	Sometimes (once or twice a month)	Grocery store,Restaurant	Never heard of it	Moderately concerned	Moderately concerned	Moderately concerned	Very concerned	Very concerned	Somewhat likely	No	1980	United States of America	North Carolina
2019-10-11 21:29:00	2019-10-11 21:31:00	100	123	TRUE	2019-10-11 21:31:00	EN	Often (once a week)	Grocery store,Other	Vaguely familiar	Moderately concerned	Moderately concerned	Very concerned	Extremely concerned	Very concerned	Extremely likely	Yes	2004	United States of America	North Carolina
2019-10-11 21:32:00	2019-10-11 21:33:00	100	85	TRUE	2019-10-11 21:33:00	EN	Sometimes (once or twice a month)	I do not purchase seafood	Never heard of it	Moderately concerned	Very concerned	Very concerned	Extremely concerned	Moderately concerned	Somewhat likely	Yes	2000	United States of America	North Carolina
2019-10-11 21:39:00	2019-10-11 21:41:00	100	111	TRUE	2019-10-11 21:41:00	EN	Seldom (once or twice a year)	I do not purchase seafood	Vaguely familiar	Moderately concerned	Extremely concerned	Very concerned	Extremely concerned	Very concerned	Somewhat likely	Yes	2001	United States of America	North Carolina
2019-10-11 22:02:00	2019-10-11 22:05:00	100	160	TRUE	2019-10-11 22:05:00	EN	Sometimes (once or twice a month)	Grocery store,Restaurant	Vaguely familiar	Moderately concerned	Slightly concerned	Slightly concerned	Very concerned	Very concerned	Somewhat likely	No	1989	United States of America	North Carolina
2019-10-11 22:21:00	2019-10-11 22:23:00	100	100	TRUE	2019-10-11 22:23:00	EN	Often (once a week)	Restaurant	Vaguely familiar	Moderately concerned	Not at all concerned	Very concerned	Extremely concerned	Moderately concerned	Somewhat likely	Yes	1998	United States of America	North Carolina
2019-10-11 22:33:00	2019-10-11 22:35:00	100	124	TRUE	2019-10-11 22:35:00	EN	Often (once a week)	Grocery store,Restaurant	Never heard of it	Moderately concerned	Very concerned	Not at all concerned	Moderately concerned	Very concerned	Somewhat likely	No	1984	United States of America	Indiana
2019-10-11 22:35:00	2019-10-11 22:38:00	100	150	TRUE	2019-10-11 22:38:00	EN	Sometimes (once or twice a month)	Grocery store,Restaurant	Never heard of it	Moderately concerned	Moderately concerned	Slightly concerned	Moderately concerned	Very concerned	Somewhat likely	No	1959	United States of America	North Carolina
2019-10-11 22:53:00	2019-10-11 22:55:00	100	130	TRUE	2019-10-11 22:55:00	EN	Very often (several times per week)	Grocery store	Very familiar	Moderately concerned	Slightly concerned	Moderately concerned	Extremely concerned	Very concerned	Somewhat likely	No	1955	United States of America	Maryland
2019-10-11 22:52:00	2019-10-11 22:57:00	100	279	TRUE	2019-10-11 22:57:00	EN	Sometimes (once or twice a month)	Seafood market,Grocery store,Restaurant	Vaguely familiar	Moderately concerned	Very concerned	Moderately concerned	Very concerned	Very concerned	Somewhat likely	No	1971	United States of America	North Carolina
2019-10-11 23:06:00	2019-10-11 23:08:00	100	161	TRUE	2019-10-11 23:08:00	EN	Seldom (once or twice a year)	Restaurant	Never heard of it	Moderately concerned	Extremely concerned	Very concerned	Very concerned	Moderately concerned	Somewhat unlikely	Yes	2000	United States of America	Minnesota
2019-10-11 23:20:00	2019-10-11 23:23:00	100	189	TRUE	2019-10-11 23:23:00	EN	Sometimes (once or twice a month)	Restaurant	Never heard of it	Moderately concerned	Not at all concerned	Moderately concerned	Very concerned	Slightly concerned	Neither likely nor unlikely	No	1992	United States of America	California
2019-10-11 23:19:00	2019-10-11 23:28:00	100	575	TRUE	2019-10-11 23:28:00	EN	Seldom (once or twice a year)	Restaurant	Vaguely familiar	Moderately concerned	Extremely concerned	Very concerned	Extremely concerned	Extremely concerned	Neither likely nor unlikely	No	1971	United States of America	Minnesota
2019-10-11 23:31:00	2019-10-11 23:34:00	100	183	TRUE	2019-10-11 23:34:00	EN	Sometimes (once or twice a month)	Grocery store	Never heard of it	Moderately concerned	Slightly concerned	Slightly concerned	Slightly concerned	Slightly concerned	Somewhat unlikely	No	1979	United States of America	Minnesota
2019-10-12 00:16:00	2019-10-12 00:18:00	100	130	TRUE	2019-10-12 00:18:00	EN	Often (once a week)	Grocery store	Vaguely familiar	Moderately concerned	Extremely concerned	Extremely concerned	Extremely concerned	Extremely concerned	Somewhat likely	No	1980	United States of America	Minnesota
2019-10-12 01:12:00	2019-10-12 01:14:00	100	110	TRUE	2019-10-12 01:14:00	EN	Often (once a week)	Grocery store,Restaurant	Vaguely familiar	Moderately concerned	Extremely concerned	Very concerned	Extremely concerned	Very concerned	Extremely likely	No	1981	United States of America	North Carolina
2019-10-12 01:51:00	2019-10-12 01:54:00	100	163	TRUE	2019-10-12 01:54:00	EN	Seldom (once or twice a year)	Grocery store	Never heard of it	Moderately concerned	Very concerned	Slightly concerned	Moderately concerned	Moderately concerned	Somewhat likely	No	1970	United States of America	Florida
2019-10-12 04:23:00	2019-10-12 04:34:00	100	665	TRUE	2019-10-12 04:34:00	EN	Seldom (once or twice a year)	Grocery store	Vaguely familiar	Moderately concerned	Moderately concerned	Extremely concerned	Extremely concerned	Slightly concerned	Somewhat unlikely	Yes	1998	United States of America	North Carolina
2019-10-12 06:42:00	2019-10-12 06:45:00	100	150	TRUE	2019-10-12 06:45:00	EN	Often (once a week)	Restaurant	Never heard of it	Moderately concerned	Moderately concerned	Very concerned	Moderately concerned	Extremely concerned	Neither likely nor unlikely	No	1967	United States of America	North Carolina
2019-10-12 08:27:00	2019-10-12 08:29:00	100	158	TRUE	2019-10-12 08:29:00	EN	Never	I do not purchase seafood	Vaguely familiar	Moderately concerned	Moderately concerned	Extremely concerned	Extremely concerned	Slightly concerned	Extremely unlikely	No	1982	United States of America	Tennessee
2019-10-12 08:52:00	2019-10-12 08:56:00	100	255	TRUE	2019-10-12 08:56:00	EN	Often (once a week)	Grocery store,Restaurant	Vaguely familiar	Moderately concerned	Extremely concerned	Very concerned	Very concerned	Moderately concerned	Extremely likely	No	1943	United States of America	New Jersey
2019-10-12 09:34:00	2019-10-12 09:38:00	100	215	TRUE	2019-10-12 09:38:00	EN	Very often (several times per week)	Grocery store	Vaguely familiar	Moderately concerned	Very concerned	Slightly concerned	Very concerned	Very concerned	Neither likely nor unlikely	No	1962	United States of America	North Carolina
2019-10-12 10:10:00	2019-10-12 10:16:00	100	348	TRUE	2019-10-12 10:16:00	EN	Often (once a week)	Restaurant	Never heard of it	Moderately concerned	Extremely concerned	Not at all concerned	Slightly concerned	Very concerned	Somewhat likely	No	1966	United States of America	North Carolina
2019-10-12 10:15:00	2019-10-12 10:17:00	100	117	TRUE	2019-10-12 10:17:00	EN	Seldom (once or twice a year)	Restaurant	Vaguely familiar	Moderately concerned	Extremely concerned	Moderately concerned	Very concerned	Moderately concerned	Extremely likely	No	1969	United States of America	Oregon
2019-10-12 10:20:00	2019-10-12 10:22:00	100	141	TRUE	2019-10-12 10:22:00	EN	Sometimes (once or twice a month)	Other	Never heard of it	Moderately concerned	Very concerned	Very concerned	Extremely concerned	Very concerned	Somewhat likely	Yes	1996	United States of America	Florida
2019-10-12 10:31:00	2019-10-12 10:32:00	100	96	TRUE	2019-10-12 10:32:00	EN	Very often (several times per week)	Other	Vaguely familiar	Moderately concerned	Very concerned	Very concerned	Very concerned	Very concerned	Somewhat likely	No	1968	United States of America	North Carolina
2019-10-12 10:38:00	2019-10-12 10:40:00	100	152	TRUE	2019-10-12 10:40:00	EN	Often (once a week)	Grocery store	Vaguely familiar	Moderately concerned	Very concerned	Very concerned	Very concerned	Very concerned	Somewhat likely	Yes	2000	United States of America	Alabama
2019-10-12 11:03:00	2019-10-12 11:07:00	100	243	TRUE	2019-10-12 11:07:00	EN	Sometimes (once or twice a month)	Grocery store,Restaurant	Vaguely familiar	Moderately concerned	Moderately concerned	Very concerned	Extremely concerned	Moderately concerned	Somewhat likely	No	1953	United States of America	Florida
2019-10-12 12:43:00	2019-10-12 12:45:00	100	124	TRUE	2019-10-12 12:45:00	EN	Sometimes (once or twice a month)	Grocery store	Never heard of it	Moderately concerned	Very concerned	Very concerned	Very concerned	Very concerned	Extremely likely	Yes	1997	United States of America	Arizona
2019-10-12 12:44:00	2019-10-12 12:47:00	100	132	TRUE	2019-10-12 12:47:00	EN	Often (once a week)	Grocery store	Never heard of it	Moderately concerned	Very concerned	Slightly concerned	Moderately concerned	Not at all concerned	Somewhat likely	No	1976	United States of America	Florida
2019-10-12 13:19:00	2019-10-12 13:22:00	100	143	TRUE	2019-10-12 13:22:00	EN	Often (once a week)	Grocery store,Restaurant	Never heard of it	Moderately concerned	Very concerned	Very concerned	Extremely concerned	Slightly concerned	Somewhat likely	No	1979	United States of America	North Carolina
2019-10-12 13:22:00	2019-10-12 13:25:00	100	207	TRUE	2019-10-12 13:25:00	EN	Sometimes (once or twice a month)	Grocery store,Restaurant	Vaguely familiar	Moderately concerned	Moderately concerned	Moderately concerned	Moderately concerned	Moderately concerned	Somewhat likely	No	1991	United States of America	Montana
2019-10-12 14:38:00	2019-10-12 14:40:00	100	138	TRUE	2019-10-12 14:40:00	EN	Sometimes (once or twice a month)	Grocery store,Restaurant	Never heard of it	Moderately concerned	Very concerned	Very concerned	Extremely concerned	Extremely concerned	Somewhat likely	No	1971	United States of America	Minnesota
2019-10-12 14:46:00	2019-10-12 14:48:00	100	124	TRUE	2019-10-12 14:48:00	EN	Never	I do not purchase seafood	Vaguely familiar	Moderately concerned	Extremely concerned	Slightly concerned	Extremely concerned	Not at all concerned	Extremely likely	No	1993	United States of America	Virginia
2019-10-12 14:54:00	2019-10-12 14:56:00	100	122	TRUE	2019-10-12 14:56:00	EN	Sometimes (once or twice a month)	Grocery store	Vaguely familiar	Moderately concerned	Extremely concerned	Very concerned	Extremely concerned	Extremely concerned	Somewhat likely	No	1971	United States of America	Indiana
2019-10-12 18:57:00	2019-10-12 19:00:00	100	171	TRUE	2019-10-12 19:00:00	EN	Very often (several times per week)	Grocery store	Never heard of it	Moderately concerned	Very concerned	Moderately concerned	Very concerned	Extremely concerned	Extremely likely	No	1984	United States of America	Minnesota
2019-10-12 20:50:00	2019-10-12 20:52:00	100	93	TRUE	2019-10-12 20:52:00	EN	Seldom (once or twice a year)	Restaurant	Never heard of it	Moderately concerned	Moderately concerned	Moderately concerned	Moderately concerned	Very concerned	Somewhat likely	No	1993	United States of America	North Carolina
2019-10-12 21:53:00	2019-10-12 21:55:00	100	151	TRUE	2019-10-12 21:55:00	EN	Often (once a week)	Grocery store,Restaurant	Vaguely familiar	Moderately concerned	Very concerned	Moderately concerned	Very concerned	Very concerned	Neither likely nor unlikely	No	1994	United States of America	North Carolina
2019-10-12 22:05:00	2019-10-12 22:07:00	100	104	TRUE	2019-10-12 22:07:00	EN	Sometimes (once or twice a month)	Restaurant	Vaguely familiar	Moderately concerned	Moderately concerned	Moderately concerned	Very concerned	Moderately concerned	Extremely likely	No	1971	United States of America	North Carolina
2019-10-12 22:16:00	2019-10-12 22:18:00	100	128	TRUE	2019-10-12 22:18:00	EN	Sometimes (once or twice a month)	Grocery store,Restaurant	Vaguely familiar	Moderately concerned	Moderately concerned	Moderately concerned	Moderately concerned	Moderately concerned	Extremely likely	No	1984	United States of America	Washington
2019-10-12 22:19:00	2019-10-12 22:22:00	100	184	TRUE	2019-10-12 22:22:00	EN	Sometimes (once or twice a month)	Other	Never heard of it	Moderately concerned	Moderately concerned	Slightly concerned	Moderately concerned	Moderately concerned	Somewhat likely	No	1968	United States of America	South Carolina
2019-10-12 22:40:00	2019-10-12 22:44:00	100	275	TRUE	2019-10-12 22:44:00	EN	Often (once a week)	Grocery store,Restaurant	Never heard of it	Moderately concerned	Moderately concerned	Moderately concerned	Very concerned	Moderately concerned	Somewhat likely	No	1950	United States of America	North Carolina
2019-10-12 22:51:00	2019-10-12 22:54:00	100	196	TRUE	2019-10-12 22:54:00	EN	Sometimes (once or twice a month)	Grocery store	Vaguely familiar	Moderately concerned	Moderately concerned	Very concerned	Very concerned	Not at all concerned	Somewhat likely	Yes	1993	United States of America	North Carolina
2019-10-12 23:09:00	2019-10-12 23:11:00	100	113	TRUE	2019-10-12 23:11:00	EN	Sometimes (once or twice a month)	Grocery store,Restaurant	Never heard of it	Moderately concerned	Slightly concerned	Extremely concerned	Extremely concerned	Extremely concerned	Extremely likely	No	1992	United States of America	North Carolina
2019-10-12 23:34:00	2019-10-12 23:36:00	100	106	TRUE	2019-10-12 23:36:00	EN	Sometimes (once or twice a month)	Restaurant	Vaguely familiar	Moderately concerned	Extremely concerned	Slightly concerned	Very concerned	Moderately concerned	Somewhat likely	No	1997	United States of America	North Carolina
2019-10-13 00:08:00	2019-10-13 00:09:00	100	89	TRUE	2019-10-13 00:09:00	EN	Sometimes (once or twice a month)	Grocery store,Restaurant	Vaguely familiar	Moderately concerned	Very concerned	Moderately concerned	Very concerned	Moderately concerned	Somewhat likely	No	1992	United States of America	Maryland
2019-10-13 09:45:00	2019-10-13 09:48:00	100	149	TRUE	2019-10-13 09:48:00	EN	Sometimes (once or twice a month)	Grocery store,Restaurant	Never heard of it	Moderately concerned	Moderately concerned	Not at all concerned	Very concerned	Very concerned	Somewhat likely	Yes	1998	United States of America	North Carolina
2019-10-13 10:38:00	2019-10-13 10:42:00	100	242	TRUE	2019-10-13 10:42:00	EN	Very often (several times per week)	Grocery store,Restaurant	Vaguely familiar	Moderately concerned	Extremely concerned	Moderately concerned	Slightly concerned	Very concerned	Extremely likely	No	1964	United States of America	Georgia
2019-10-13 10:41:00	2019-10-13 10:43:00	100	144	TRUE	2019-10-13 10:43:00	EN	Sometimes (once or twice a month)	Seafood market	Very familiar	Moderately concerned	Very concerned	Extremely concerned	Very concerned	Slightly concerned	Somewhat likely	No	1950	United States of America	Colorado
2019-10-13 11:23:00	2019-10-13 11:25:00	100	74	TRUE	2019-10-13 11:25:00	EN	Very often (several times per week)	Grocery store	Very familiar	Moderately concerned	Moderately concerned	Slightly concerned	Very concerned	Very concerned	Neither likely nor unlikely	Yes	1997	United States of America	Florida
2019-10-13 11:37:00	2019-10-13 11:39:00	100	82	TRUE	2019-10-13 11:39:00	EN	Sometimes (once or twice a month)	Grocery store	Very familiar	Moderately concerned	Slightly concerned	Not at all concerned	Not at all concerned	Slightly concerned	Somewhat unlikely	No	1989	United States of America	Alabama
2019-10-13 12:02:00	2019-10-13 12:04:00	100	94	TRUE	2019-10-13 12:04:00	EN	Sometimes (once or twice a month)	Restaurant	Vaguely familiar	Moderately concerned	Very concerned	Very concerned	Extremely concerned	Very concerned	Somewhat likely	No	1975	United States of America	Pennsylvania
2019-10-13 13:39:00	2019-10-13 13:42:00	100	159	TRUE	2019-10-13 13:42:00	EN	Seldom (once or twice a year)	Restaurant	Vaguely familiar	Moderately concerned	Extremely concerned	Very concerned	Extremely concerned	Very concerned	Extremely likely	No	1949	United States of America	Minnesota
2019-10-13 15:25:00	2019-10-13 15:27:00	100	124	TRUE	2019-10-13 15:27:00	EN	Sometimes (once or twice a month)	Grocery store	Never heard of it	Moderately concerned	Very concerned	Slightly concerned	Moderately concerned	Extremely concerned	Extremely likely	Yes	1997	United States of America	North Carolina
2019-10-13 15:50:00	2019-10-13 15:52:00	100	120	TRUE	2019-10-13 15:52:00	EN	Sometimes (once or twice a month)	Grocery store,Restaurant	Vaguely familiar	Moderately concerned	Slightly concerned	Very concerned	Very concerned	Moderately concerned	Somewhat likely	No	1989	United States of America	California
2019-10-13 16:22:00	2019-10-13 16:24:00	100	139	TRUE	2019-10-13 16:24:00	EN	Very often (several times per week)	Grocery store	Never heard of it	Moderately concerned	Extremely concerned	Extremely concerned	Extremely concerned	Extremely concerned	Extremely likely	No	1951	United States of America	Florida
2019-10-13 16:30:00	2019-10-13 16:33:00	100	166	TRUE	2019-10-13 16:33:00	EN	Often (once a week)	Grocery store	Never heard of it	Moderately concerned	Very concerned	Slightly concerned	Very concerned	Moderately concerned	Somewhat likely	No	1968	United States of America	Florida
2019-10-13 17:52:00	2019-10-13 17:55:00	100	173	TRUE	2019-10-13 17:55:00	EN	Very often (several times per week)	Grocery store	Never heard of it	Moderately concerned	Extremely concerned	Extremely concerned	Extremely concerned	Moderately concerned	Somewhat likely	No	1967	United States of America	North Carolina
2019-10-13 18:31:00	2019-10-13 18:35:00	100	240	TRUE	2019-10-13 18:35:00	EN	Sometimes (once or twice a month)	Restaurant	Vaguely familiar	Moderately concerned	Slightly concerned	Not at all concerned	Moderately concerned	Very concerned	Neither likely nor unlikely	No	1965	United States of America	North Carolina
2019-10-13 19:10:00	2019-10-13 19:12:00	100	110	TRUE	2019-10-13 19:12:00	EN	Seldom (once or twice a year)	I do not purchase seafood	Never heard of it	Moderately concerned	Moderately concerned	Moderately concerned	Moderately concerned	Moderately concerned	Neither likely nor unlikely	Yes	2001	United States of America	North Carolina
2019-10-13 19:17:00	2019-10-13 19:21:00	100	276	TRUE	2019-10-13 19:21:00	EN	Very often (several times per week)	Grocery store	Vaguely familiar	Moderately concerned	Not at all concerned	Not at all concerned	Moderately concerned	Slightly concerned	Somewhat likely	No	1961	United States of America	North Carolina
2019-10-13 19:41:00	2019-10-13 19:43:00	100	114	TRUE	2019-10-13 19:43:00	EN	Often (once a week)	Seafood market,Grocery store,Restaurant	Vaguely familiar	Moderately concerned	Extremely concerned	Extremely concerned	Extremely concerned	Extremely concerned	Extremely likely	No	1952	United States of America	North Carolina
2019-10-13 20:42:00	2019-10-13 20:45:00	100	151	TRUE	2019-10-13 20:45:00	EN	Often (once a week)	Grocery store,Restaurant	Never heard of it	Moderately concerned	Slightly concerned	Very concerned	Extremely concerned	Very concerned	Extremely likely	Yes	1996	United States of America	North Carolina
2019-10-13 21:39:00	2019-10-13 21:41:00	100	119	TRUE	2019-10-13 21:41:00	EN	Never	I do not purchase seafood	Vaguely familiar	Moderately concerned	Moderately concerned	Very concerned	Extremely concerned	Not at all concerned	Neither likely nor unlikely	No	1983	United States of America	North Carolina
2019-10-13 22:47:00	2019-10-13 22:49:00	100	109	TRUE	2019-10-13 22:49:00	EN	Sometimes (once or twice a month)	Grocery store,Restaurant	Vaguely familiar	Moderately concerned	Slightly concerned	Moderately concerned	Extremely concerned	Slightly concerned	Somewhat likely	Yes	2001	United States of America	North Carolina
2019-10-14 00:01:00	2019-10-14 00:03:00	100	146	TRUE	2019-10-14 00:03:00	EN	Sometimes (once or twice a month)	Restaurant	Never heard of it	Moderately concerned	Extremely concerned	Slightly concerned	Very concerned	Not at all concerned	Extremely likely	No	1985	United States of America	Georgia
2019-10-14 05:35:00	2019-10-14 05:38:00	100	221	TRUE	2019-10-14 05:38:00	EN	Often (once a week)	Grocery store,Restaurant	Vaguely familiar	Moderately concerned	Slightly concerned	Very concerned	Extremely concerned	Not at all concerned	Neither likely nor unlikely	No	1977	United States of America	Maine
2019-10-14 07:19:00	2019-10-14 07:21:00	100	125	TRUE	2019-10-14 07:21:00	EN	Sometimes (once or twice a month)	Grocery store,Restaurant	Vaguely familiar	Moderately concerned	Not at all concerned	Moderately concerned	Very concerned	Moderately concerned	Extremely likely	No	1970	United States of America	North Carolina
2019-10-14 07:23:00	2019-10-14 07:26:00	100	221	TRUE	2019-10-14 07:26:00	EN	Often (once a week)	Seafood market	Never heard of it	Moderately concerned	Very concerned	Moderately concerned	Moderately concerned	Moderately concerned	Extremely likely	No	1951	United States of America	Florida
2019-10-14 07:36:00	2019-10-14 07:42:00	100	353	TRUE	2019-10-14 07:42:00	EN	Sometimes (once or twice a month)	Seafood market	Vaguely familiar	Moderately concerned	Very concerned	Moderately concerned	Extremely concerned	Moderately concerned	Extremely likely	No	1984	United States of America	District of Columbia
2019-10-14 08:29:00	2019-10-14 08:32:00	100	135	TRUE	2019-10-14 08:32:00	EN	Often (once a week)	Grocery store,Restaurant	Vaguely familiar	Moderately concerned	Moderately concerned	Moderately concerned	Moderately concerned	Moderately concerned	Somewhat likely	No	1981	United States of America	Virginia
2019-10-14 08:01:00	2019-10-14 08:33:00	100	1892	TRUE	2019-10-14 08:33:00	EN	Often (once a week)	Seafood market,Grocery store	Very familiar	Moderately concerned	Very concerned	Moderately concerned	Extremely concerned	Very concerned	Somewhat likely	No	1969	United States of America	North Carolina
2019-10-14 09:49:00	2019-10-14 09:51:00	100	121	TRUE	2019-10-14 09:51:00	EN	Often (once a week)	Grocery store,Restaurant	Vaguely familiar	Moderately concerned	Moderately concerned	Moderately concerned	Moderately concerned	Moderately concerned	Extremely likely	No	1986	United States of America	North Carolina
2019-10-14 12:02:00	2019-10-14 12:05:00	100	157	TRUE	2019-10-14 12:05:00	EN	Sometimes (once or twice a month)	Grocery store	Never heard of it	Moderately concerned	Extremely concerned	Slightly concerned	Extremely concerned	Extremely concerned	Extremely likely	No	1972	United States of America	North Carolina
2019-10-14 14:18:00	2019-10-14 14:19:00	100	106	TRUE	2019-10-14 14:19:00	EN	Very often (several times per week)	Grocery store,Restaurant	Vaguely familiar	Moderately concerned	Slightly concerned	Very concerned	Very concerned	Moderately concerned	Somewhat likely	Yes	1997	United States of America	Georgia
2019-10-14 14:23:00	2019-10-14 14:31:00	100	497	TRUE	2019-10-14 14:31:00	EN	Sometimes (once or twice a month)	Grocery store,Restaurant	Never heard of it	Moderately concerned	Moderately concerned	Slightly concerned	Moderately concerned	Slightly concerned	Neither likely nor unlikely	Yes	2000	United States of America	North Carolina
2019-10-14 14:52:00	2019-10-14 14:54:00	100	129	TRUE	2019-10-14 14:54:00	EN	Sometimes (once or twice a month)	Grocery store	Vaguely familiar	Moderately concerned	Very concerned	Moderately concerned	Moderately concerned	Slightly concerned	Somewhat unlikely	Yes	2001	United States of America	North Carolina
2019-10-14 15:20:00	2019-10-14 15:23:00	100	145	TRUE	2019-10-14 15:23:00	EN	Often (once a week)	Grocery store,Restaurant	Vaguely familiar	Moderately concerned	Slightly concerned	Moderately concerned	Moderately concerned	Moderately concerned	Somewhat likely	Yes	2001	United States of America	North Carolina
2019-10-14 15:29:00	2019-10-14 15:31:00	100	120	TRUE	2019-10-14 15:31:00	EN	Sometimes (once or twice a month)	Grocery store,Restaurant	Vaguely familiar	Moderately concerned	Moderately concerned	Very concerned	Very concerned	Extremely concerned	Extremely likely	Yes	2000	United States of America	North Carolina
2019-10-14 14:25:00	2019-10-14 15:47:00	100	4961	TRUE	2019-10-14 15:47:00	EN	Never	I do not purchase seafood	Vaguely familiar	Moderately concerned	Extremely concerned	Very concerned	Extremely concerned	Very concerned	Extremely likely	Yes	2001	United States of America	North Carolina
2019-10-14 15:50:00	2019-10-14 15:53:00	100	177	TRUE	2019-10-14 15:53:00	EN	Very often (several times per week)	Restaurant,Other	Never heard of it	Moderately concerned	Very concerned	Very concerned	Very concerned	Very concerned	Somewhat likely	Yes	2000	United States of America	North Carolina
2019-10-14 15:53:00	2019-10-14 15:54:00	100	98	TRUE	2019-10-14 15:54:00	EN	Sometimes (once or twice a month)	Grocery store	Vaguely familiar	Moderately concerned	Moderately concerned	Slightly concerned	Slightly concerned	Moderately concerned	Somewhat likely	Yes	1997	United States of America	Massachusetts
2019-10-14 15:59:00	2019-10-14 16:02:00	100	165	TRUE	2019-10-14 16:02:00	EN	Often (once a week)	Grocery store	Vaguely familiar	Moderately concerned	Very concerned	Very concerned	Extremely concerned	Extremely concerned	Somewhat likely	No	1957	United States of America	Ohio
2019-10-14 16:00:00	2019-10-14 16:02:00	100	85	TRUE	2019-10-14 16:02:00	EN	Never	I do not purchase seafood	Vaguely familiar	Moderately concerned	Extremely concerned	Very concerned	Very concerned	Moderately concerned	Somewhat likely	Yes	1999	United States of America	North Carolina
2019-10-14 16:12:00	2019-10-14 16:14:00	100	90	TRUE	2019-10-14 16:14:00	EN	Sometimes (once or twice a month)	Seafood market,Restaurant	Vaguely familiar	Moderately concerned	Very concerned	Slightly concerned	Moderately concerned	Extremely concerned	Somewhat likely	Yes	1999	United States of America	North Carolina
2019-10-14 16:23:00	2019-10-14 16:24:00	100	83	TRUE	2019-10-14 16:24:00	EN	Often (once a week)	I do not purchase seafood	Vaguely familiar	Moderately concerned	Very concerned	Slightly concerned	Very concerned	Very concerned	Neither likely nor unlikely	Yes	1997	United States of America	North Carolina
2019-10-14 15:33:00	2019-10-14 16:28:00	100	3259	TRUE	2019-10-14 16:28:00	EN	Never	I do not purchase seafood	Vaguely familiar	Moderately concerned	Very concerned	Moderately concerned	Moderately concerned	Moderately concerned	Extremely unlikely	Yes	2001	United States of America	North Carolina
2019-10-14 16:27:00	2019-10-14 16:28:00	100	89	TRUE	2019-10-14 16:28:00	EN	Sometimes (once or twice a month)	Restaurant	Never heard of it	Moderately concerned	Extremely concerned	Moderately concerned	Moderately concerned	Slightly concerned	Extremely likely	Yes	2000	United States of America	North Carolina
2019-10-14 16:36:00	2019-10-14 16:38:00	100	129	TRUE	2019-10-14 16:38:00	EN	Sometimes (once or twice a month)	Grocery store	Vaguely familiar	Moderately concerned	Moderately concerned	Moderately concerned	Very concerned	Extremely concerned	Extremely likely	Yes	1989	United States of America	North Carolina
2019-10-14 16:39:00	2019-10-14 16:41:00	100	101	TRUE	2019-10-14 16:41:00	EN	Often (once a week)	Grocery store	Vaguely familiar	Moderately concerned	Very concerned	Slightly concerned	Moderately concerned	Moderately concerned	Neither likely nor unlikely	Yes	1998	United States of America	North Carolina
2019-10-14 16:52:00	2019-10-14 16:53:00	100	64	TRUE	2019-10-14 16:53:00	EN	Never	I do not purchase seafood	Never heard of it	Moderately concerned	Extremely concerned	Very concerned	Extremely concerned	Slightly concerned	Extremely unlikely	Yes	1999	United States of America	North Carolina
2019-10-14 17:57:00	2019-10-14 17:58:00	100	71	TRUE	2019-10-14 17:58:00	EN	Never	I do not purchase seafood	Never heard of it	Moderately concerned	Extremely concerned	Not at all concerned	Moderately concerned	Extremely concerned	Extremely unlikely	Yes	1999	United States of America	North Carolina
2019-10-14 18:13:00	2019-10-14 18:15:00	100	88	TRUE	2019-10-14 18:15:00	EN	Sometimes (once or twice a month)	I do not purchase seafood	Vaguely familiar	Moderately concerned	Extremely concerned	Slightly concerned	Extremely concerned	Very concerned	Somewhat unlikely	Yes	2001	United States of America
2019-10-14 18:33:00	2019-10-14 18:35:00	100	96	TRUE	2019-10-14 18:35:00	EN	Sometimes (once or twice a month)	Restaurant	Vaguely familiar	Moderately concerned	Very concerned	Very concerned	Very concerned	Very concerned	Somewhat likely	No	1981	United States of America	North Carolina
2019-10-14 18:34:00	2019-10-14 18:37:00	100	154	TRUE	2019-10-14 18:37:00	EN	Seldom (once or twice a year)	Grocery store	Never heard of it	Moderately concerned	Not at all concerned	Not at all concerned	Extremely concerned	Moderately concerned	Neither likely nor unlikely	Yes	2001	United States of America	North Carolina
2019-10-14 18:41:00	2019-10-14 18:44:00	100	134	TRUE	2019-10-14 18:44:00	EN	Sometimes (once or twice a month)	Restaurant	Never heard of it	Moderately concerned	Moderately concerned	Slightly concerned	Extremely concerned	Extremely concerned	Extremely likely	Yes	2001	United States of America	North Carolina
2019-10-14 18:53:00	2019-10-14 18:55:00	100	116	TRUE	2019-10-14 18:55:00	EN	Often (once a week)	Seafood market,Grocery store,Restaurant	Vaguely familiar	Moderately concerned	Slightly concerned	Slightly concerned	Moderately concerned	Very concerned	Somewhat likely	No	1992	United States of America	Maine
2019-10-14 19:23:00	2019-10-14 19:25:00	100	98	TRUE	2019-10-14 19:25:00	EN	Sometimes (once or twice a month)	Seafood market	Vaguely familiar	Moderately concerned	Moderately concerned	Moderately concerned	Extremely concerned	Slightly concerned	Somewhat likely	No	1967	United States of America	Pennsylvania
2019-10-14 19:32:00	2019-10-14 19:34:00	100	161	TRUE	2019-10-14 19:34:00	EN	Often (once a week)	Grocery store,Restaurant	Very familiar	Moderately concerned	Very concerned	Extremely concerned	Extremely concerned	Extremely concerned	Extremely likely	No	1968	United States of America	North Carolina
2019-10-14 20:11:00	2019-10-14 20:14:00	100	142	TRUE	2019-10-14 20:14:00	EN	Often (once a week)	Restaurant	Vaguely familiar	Moderately concerned	Moderately concerned	Slightly concerned	Moderately concerned	Very concerned	Somewhat likely	No	1989	United States of America	Florida
2019-10-14 20:16:00	2019-10-14 20:18:00	100	115	TRUE	2019-10-14 20:18:00	EN	Often (once a week)	Grocery store,Other	Vaguely familiar	Moderately concerned	Slightly concerned	Moderately concerned	Moderately concerned	Extremely concerned	Somewhat likely	No	1980	United States of America	Wisconsin
2019-10-14 20:26:00	2019-10-14 20:28:00	100	100	TRUE	2019-10-14 20:28:00	EN	Seldom (once or twice a year)	Restaurant	Vaguely familiar	Moderately concerned	Slightly concerned	Slightly concerned	Very concerned	Moderately concerned	Somewhat likely	Yes	1999	United States of America	North Carolina
2019-10-14 21:17:00	2019-10-14 21:19:00	100	94	TRUE	2019-10-14 21:19:00	EN	Often (once a week)	Grocery store,Restaurant	Vaguely familiar	Moderately concerned	Very concerned	Very concerned	Very concerned	Slightly concerned	Somewhat likely	Yes	1997	United States of America	North Carolina
2019-10-14 21:26:00	2019-10-14 21:30:00	100	224	TRUE	2019-10-14 21:30:00	EN	Sometimes (once or twice a month)	Grocery store	Vaguely familiar	Moderately concerned	Moderately concerned	Very concerned	Extremely concerned	Very concerned	Neither likely nor unlikely	Yes	1972	United States of America	North Carolina
2019-10-14 23:27:00	2019-10-14 23:29:00	100	111	TRUE	2019-10-14 23:29:00	EN	Often (once a week)	Grocery store	Never heard of it	Moderately concerned	Very concerned	Slightly concerned	Very concerned	Moderately concerned	Somewhat unlikely	Yes	2001	United States of America	North Carolina
2019-10-14 23:28:00	2019-10-14 23:32:00	100	231	TRUE	2019-10-14 23:32:00	EN	Sometimes (once or twice a month)	Grocery store,Restaurant	Vaguely familiar	Moderately concerned	Extremely concerned	Very concerned	Extremely concerned	Moderately concerned	Neither likely nor unlikely	Yes	2001	United States of America	North Carolina
2019-10-15 00:01:00	2019-10-15 00:03:00	100	77	TRUE	2019-10-15 00:03:00	EN	Sometimes (once or twice a month)	Grocery store,Restaurant	Vaguely familiar	Moderately concerned	Moderately concerned	Very concerned	Very concerned	Extremely concerned	Somewhat likely	Yes	1998	United States of America	North Carolina
2019-10-15 00:40:00	2019-10-15 00:42:00	100	90	TRUE	2019-10-15 00:42:00	EN	Sometimes (once or twice a month)	Restaurant	Never heard of it	Moderately concerned	Slightly concerned	Moderately concerned	Very concerned	Very concerned	Somewhat likely	No	1997	United States of America	North Carolina
2019-10-15 01:21:00	2019-10-15 01:23:00	100	114	TRUE	2019-10-15 01:23:00	EN	Sometimes (once or twice a month)	I do not purchase seafood	Never heard of it	Moderately concerned	Very concerned	Slightly concerned	Very concerned	Moderately concerned	Somewhat likely	Yes	2001	United States of America	North Carolina
2019-10-15 06:35:00	2019-10-15 06:39:00	100	262	TRUE	2019-10-15 06:39:00	EN	Sometimes (once or twice a month)	Seafood market	Vaguely familiar	Moderately concerned	Moderately concerned	Moderately concerned	Very concerned	Moderately concerned	Somewhat likely	No	1966	United States of America	Pennsylvania
2019-10-15 12:28:00	2019-10-15 12:30:00	100	103	TRUE	2019-10-15 12:30:00	EN	Sometimes (once or twice a month)	Grocery store	Never heard of it	Moderately concerned	Very concerned	Moderately concerned	Very concerned	Slightly concerned	Extremely likely	Yes	2001	United States of America	North Carolina
2019-10-15 13:57:00	2019-10-15 14:01:00	100	257	TRUE	2019-10-15 14:01:00	EN	Very often (several times per week)	Grocery store,Restaurant	Vaguely familiar	Moderately concerned	Extremely concerned	Very concerned	Extremely concerned	Slightly concerned	Neither likely nor unlikely	Yes	1995	United States of America	Florida
2019-10-15 14:15:00	2019-10-15 14:16:00	100	86	TRUE	2019-10-15 14:16:00	EN	Sometimes (once or twice a month)	Grocery store,Restaurant	Never heard of it	Moderately concerned	Extremely concerned	Moderately concerned	Moderately concerned	Very concerned	Somewhat likely	Yes	2000	United States of America	North Carolina
2019-10-15 21:51:00	2019-10-15 21:52:00	100	85	TRUE	2019-10-15 21:52:00	EN	Sometimes (once or twice a month)	Grocery store	Never heard of it	Moderately concerned	Extremely concerned	Moderately concerned	Extremely concerned	Very concerned	Somewhat likely	Yes	1999	United States of America	North Carolina
2019-10-16 09:22:00	2019-10-16 09:24:00	100	170	TRUE	2019-10-16 09:24:00	EN	Seldom (once or twice a year)	Grocery store,Restaurant	Never heard of it	Moderately concerned	Very concerned	Very concerned	Moderately concerned	Moderately concerned	Neither likely nor unlikely	Yes	1998	United States of America	North Carolina
2019-10-16 10:26:00	2019-10-16 10:30:00	100	224	TRUE	2019-10-16 10:30:00	EN	Often (once a week)	Seafood market,Grocery store,Restaurant	Never heard of it	Moderately concerned	Extremely concerned	Moderately concerned	Extremely concerned	Extremely concerned	Extremely likely	No	1961	United States of America	Florida
2019-10-16 11:49:00	2019-10-16 11:52:00	100	169	TRUE	2019-10-16 11:52:00	EN	Sometimes (once or twice a month)	Grocery store	Never heard of it	Moderately concerned	Moderately concerned	Moderately concerned	Very concerned	Moderately concerned	Somewhat likely	Yes	1997	United States of America	North Carolina
2019-10-16 15:53:00	2019-10-16 15:55:00	100	123	TRUE	2019-10-16 15:55:00	EN	Often (once a week)	Grocery store	Never heard of it	Moderately concerned	Extremely concerned	Moderately concerned	Very concerned	Very concerned	Neither likely nor unlikely	No	1966	United States of America	Pennsylvania
2019-10-16 21:45:00	2019-10-16 21:48:00	100	177	TRUE	2019-10-16 21:48:00	EN	Often (once a week)	Seafood market,Grocery store,Restaurant	Vaguely familiar	Moderately concerned	Slightly concerned	Slightly concerned	Very concerned	Slightly concerned	Somewhat likely	No	1974	United States of America	Massachusetts
2019-10-16 21:54:00	2019-10-16 21:56:00	100	104	TRUE	2019-10-16 21:56:00	EN	Sometimes (once or twice a month)	Grocery store	Vaguely familiar	Moderately concerned	Very concerned	Very concerned	Moderately concerned	Moderately concerned	Extremely likely	Yes	2001	United States of America	North Carolina
2019-10-16 21:57:00	2019-10-16 22:00:00	100	215	TRUE	2019-10-16 22:00:00	EN	Seldom (once or twice a year)	Grocery store,Restaurant	Vaguely familiar	Moderately concerned	Very concerned	Very concerned	Very concerned	Slightly concerned	Neither likely nor unlikely	Yes	2001	United States of America	North Carolina
2019-10-16 22:09:00	2019-10-16 22:11:00	100	94	TRUE	2019-10-16 22:11:00	EN	Sometimes (once or twice a month)	Restaurant	Never heard of it	Moderately concerned	Very concerned	Moderately concerned	Very concerned	Moderately concerned	Neither likely nor unlikely	Yes	1999	United States of America	Virginia
2019-10-16 22:26:00	2019-10-16 22:27:00	100	107	TRUE	2019-10-16 22:27:00	EN	Very often (several times per week)	Other	Never heard of it	Moderately concerned	Slightly concerned	Very concerned	Very concerned	Moderately concerned	Somewhat unlikely	Yes	2001	United States of America	Pennsylvania
2019-10-16 22:27:00	2019-10-16 22:28:00	100	58	TRUE	2019-10-16 22:28:00	EN	Sometimes (once or twice a month)	Grocery store	Never heard of it	Moderately concerned	Slightly concerned	Slightly concerned	Moderately concerned	Slightly concerned	Somewhat unlikely	Yes	2000	United States of America	Wisconsin
2019-10-16 23:06:00	2019-10-16 23:08:00	100	86	TRUE	2019-10-16 23:08:00	EN	Often (once a week)	Grocery store,Restaurant	Vaguely familiar	Moderately concerned	Not at all concerned	Extremely concerned	Extremely concerned	Slightly concerned	Extremely likely	Yes	2001	United States of America	North Carolina
2019-10-16 23:32:00	2019-10-16 23:34:00	100	140	TRUE	2019-10-16 23:34:00	EN	Sometimes (once or twice a month)	Restaurant	Never heard of it	Moderately concerned	Very concerned	Moderately concerned	Moderately concerned	Moderately concerned	Somewhat likely	No	2001	United States of America	North Carolina
2019-10-16 23:52:00	2019-10-17 00:02:00	100	610	TRUE	2019-10-17 00:02:00	EN	Often (once a week)	Grocery store	Vaguely familiar	Moderately concerned	Very concerned	Very concerned	Very concerned	Moderately concerned	Somewhat likely	Yes	2001	United States of America	North Carolina
2019-10-17 00:46:00	2019-10-17 00:50:00	100	216	TRUE	2019-10-17 00:50:00	EN	Sometimes (once or twice a month)	Restaurant	Very familiar	Moderately concerned	Moderately concerned	Moderately concerned	Moderately concerned	Slightly concerned	Extremely likely	No	1975	United States of America	New York
2019-10-17 01:00:00	2019-10-17 01:02:00	100	138	TRUE	2019-10-17 01:02:00	EN	Often (once a week)	Grocery store	Never heard of it	Moderately concerned	Moderately concerned	Moderately concerned	Extremely concerned	Slightly concerned	Somewhat likely	Yes	2001	United States of America	North Carolina
2019-10-17 07:02:00	2019-10-17 07:05:00	100	158	TRUE	2019-10-17 07:05:00	EN	Very often (several times per week)	Seafood market,Grocery store	Vaguely familiar	Moderately concerned	Slightly concerned	Not at all concerned	Very concerned	Very concerned	Somewhat likely	No	1967	United States of America	North Carolina
2019-10-17 09:58:00	2019-10-17 10:00:00	100	80	TRUE	2019-10-17 10:00:00	EN	Often (once a week)	Grocery store,Restaurant	Never heard of it	Moderately concerned	Very concerned	Very concerned	Very concerned	Very concerned	Extremely likely	Yes	1997	United States of America	North Carolina
2019-10-17 10:04:00	2019-10-17 10:06:00	100	142	TRUE	2019-10-17 10:06:00	EN	Very often (several times per week)	I do not purchase seafood	Vaguely familiar	Moderately concerned	Very concerned	Moderately concerned	Very concerned	Extremely concerned	Neither likely nor unlikely	Yes	1999	United States of America	North Carolina
2019-10-17 12:04:00	2019-10-17 12:06:00	100	119	TRUE	2019-10-17 12:06:00	EN	Sometimes (once or twice a month)	Grocery store	Never heard of it	Moderately concerned	Slightly concerned	Slightly concerned	Slightly concerned	Slightly concerned	Somewhat unlikely	Yes	1998	United States of America	North Carolina
2019-10-17 15:30:00	2019-10-17 15:32:00	100	142	TRUE	2019-10-17 15:32:00	EN	Seldom (once or twice a year)	Restaurant	Never heard of it	Moderately concerned	Not at all concerned	Very concerned	Extremely concerned	Extremely concerned	Extremely likely	Yes	2001	United States of America	Maryland
2019-10-17 20:20:00	2019-10-17 20:23:00	100	147	TRUE	2019-10-17 20:23:00	EN	Sometimes (once or twice a month)	Grocery store,Restaurant	Never heard of it	Moderately concerned	Slightly concerned	Slightly concerned	Slightly concerned	Moderately concerned	Neither likely nor unlikely	No	1958	United States of America	Arizona
2019-10-19 10:19:00	2019-10-19 10:23:00	100	238	TRUE	2019-10-19 10:23:00	EN	Sometimes (once or twice a month)	Grocery store	Vaguely familiar	Moderately concerned	Moderately concerned	Moderately concerned	Very concerned	Extremely concerned	Somewhat likely	No	1968	United States of America	North Carolina
2019-10-19 10:38:00	2019-10-19 10:39:00	100	83	TRUE	2019-10-19 10:39:00	EN	Sometimes (once or twice a month)	Grocery store	Vaguely familiar	Moderately concerned	Slightly concerned	Slightly concerned	Moderately concerned	Very concerned	Somewhat likely	No	1969	United States of America	North Carolina
2019-10-19 10:42:00	2019-10-19 10:45:00	100	186	TRUE	2019-10-19 10:45:00	EN	Sometimes (once or twice a month)	Grocery store,Restaurant	Vaguely familiar	Moderately concerned	Not at all concerned	Very concerned	Very concerned	Extremely concerned	Somewhat likely	No	1968	United States of America	North Carolina
2019-10-19 11:00:00	2019-10-19 11:02:00	100	120	TRUE	2019-10-19 11:02:00	EN	Very often (several times per week)	Seafood market,Grocery store,Restaurant	Vaguely familiar	Moderately concerned	Extremely concerned	Extremely concerned	Extremely concerned	Extremely concerned	Extremely likely	No	too intrusive	United States of America	North Carolina
2019-10-19 11:43:00	2019-10-19 11:46:00	100	138	TRUE	2019-10-19 11:46:00	EN	Sometimes (once or twice a month)	Grocery store	Never heard of it	Moderately concerned	Not at all concerned	Slightly concerned	Slightly concerned	Very concerned	Somewhat likely	No	1968	United States of America	North Carolina
2019-10-19 12:40:00	2019-10-19 12:42:00	100	101	TRUE	2019-10-19 12:42:00	EN	Sometimes (once or twice a month)	Grocery store	Never heard of it	Moderately concerned	Moderately concerned	Extremely concerned	Extremely concerned	Slightly concerned	Somewhat likely	No	1979	United States of America	North Carolina
2019-10-19 14:53:00	2019-10-19 14:55:00	100	114	TRUE	2019-10-19 14:55:00	EN	Very often (several times per week)	Grocery store	Vaguely familiar	Moderately concerned	Moderately concerned	Moderately concerned	Extremely concerned	Slightly concerned	Extremely likely	No	1962	United States of America	North Carolina
2019-10-19 15:38:00	2019-10-19 15:40:00	100	95	TRUE	2019-10-19 15:40:00	EN	Often (once a week)	Grocery store	Never heard of it	Moderately concerned	Moderately concerned	Very concerned	Extremely concerned	Moderately concerned	Extremely likely	No	1981	United States of America	North Carolina
2019-10-19 19:03:00	2019-10-19 19:07:00	100	197	TRUE	2019-10-19 19:07:00	EN	Very often (several times per week)	Grocery store,Restaurant	Very familiar	Moderately concerned	Very concerned	Very concerned	Extremely concerned	Moderately concerned	Somewhat likely	No	1963	United States of America	North Carolina
2019-10-19 20:20:00	2019-10-19 20:27:00	100	437	TRUE	2019-10-19 20:27:00	EN	Often (once a week)	Grocery store,Restaurant	Never heard of it	Moderately concerned	Very concerned	Slightly concerned	Moderately concerned	Very concerned	Somewhat likely	No	1985	United States of America	North Carolina
2019-10-19 21:45:00	2019-10-19 21:48:00	100	180	TRUE	2019-10-19 21:48:00	EN	Sometimes (once or twice a month)	Restaurant	Vaguely familiar	Moderately concerned	Moderately concerned	Very concerned	Very concerned	Moderately concerned	Somewhat likely	No	1967	United States of America	North Carolina
2019-10-20 14:08:00	2019-10-20 14:11:00	100	173	TRUE	2019-10-20 14:11:00	EN	Often (once a week)	Grocery store,Restaurant	Vaguely familiar	Moderately concerned	Very concerned	Extremely concerned	Very concerned	Very concerned	Extremely likely	No	1950	United States of America	North Carolina
2019-10-20 17:48:00	2019-10-20 17:52:00	100	224	TRUE	2019-10-20 17:52:00	EN	Sometimes (once or twice a month)	Other	Vaguely familiar	Moderately concerned	Very concerned	Very concerned	Very concerned	Moderately concerned	Extremely likely	No	1943	United States of America	North Carolina
2019-10-21 13:24:00	2019-10-21 13:25:00	100	80	TRUE	2019-10-21 13:25:00	EN	Often (once a week)	Seafood market,Grocery store,Restaurant	Vaguely familiar	Moderately concerned	Moderately concerned	Very concerned	Very concerned	Very concerned	Somewhat likely	No	1972	United States of America	North Carolina
2019-10-22 17:48:00	2019-10-22 17:50:00	100	116	TRUE	2019-10-22 17:50:00	EN	Seldom (once or twice a year)	Grocery store	Vaguely familiar	Moderately concerned	Very concerned	Very concerned	Very concerned	Very concerned	Somewhat likely	No	1985	United States of America	North Carolina
2019-10-22 20:10:00	2019-10-22 20:14:00	100	270	TRUE	2019-10-22 20:14:00	EN	Often (once a week)	Grocery store	Vaguely familiar	Moderately concerned	Very concerned	Slightly concerned	Extremely concerned	Very concerned	Somewhat unlikely	No	1967	United States of America	Florida
2019-10-22 22:56:00	2019-10-22 23:04:00	100	502	TRUE	2019-10-22 23:04:00	EN	Sometimes (once or twice a month)	Seafood market,Grocery store,Restaurant,Other	Vaguely familiar	Moderately concerned	Extremely concerned	Extremely concerned	Extremely concerned	Very concerned	Extremely likely	No	1961	United States of America	New York
2019-10-23 11:42:00	2019-10-23 11:44:00	100	116	TRUE	2019-10-23 11:44:00	EN	Often (once a week)	Seafood market,Grocery store	Never heard of it	Moderately concerned	Extremely concerned	Very concerned	Very concerned	Moderately concerned	Extremely likely	Yes	2001	United States of America	North Carolina
2019-10-24 14:50:00	2019-10-24 14:52:00	100	178	TRUE	2019-10-24 14:52:00	EN	Sometimes (once or twice a month)	Grocery store	Never heard of it	Moderately concerned	Slightly concerned	Slightly concerned	Moderately concerned	Extremely concerned	Somewhat likely	No	1967	United States of America	North Carolina
2019-10-24 16:16:00	2019-10-24 16:19:00	100	181	TRUE	2019-10-24 16:19:00	EN	Sometimes (once or twice a month)	Restaurant	Never heard of it	Moderately concerned	Very concerned	Moderately concerned	Moderately concerned	Extremely concerned	Somewhat likely	No	1972	United States of America	North Carolina
2019-10-24 18:51:00	2019-10-24 18:53:00	100	84	TRUE	2019-10-24 18:53:00	EN	Sometimes (once or twice a month)	Seafood market,Grocery store,Restaurant	Never heard of it	Moderately concerned	Extremely concerned	Moderately concerned	Extremely concerned	Moderately concerned	Somewhat likely	Yes	2000	United States of America	North Carolina
2019-10-24 20:20:00	2019-10-24 20:22:00	100	96	TRUE	2019-10-24 20:22:00	EN	Seldom (once or twice a year)	Restaurant	Vaguely familiar	Moderately concerned	Slightly concerned	Moderately concerned	Very concerned	Extremely concerned	Somewhat unlikely	No	1998	United States of America	North Carolina
2019-10-25 07:22:00	2019-10-25 07:27:00	100	292	TRUE	2019-10-25 07:27:00	EN	Often (once a week)	Restaurant	Vaguely familiar	Moderately concerned	Very concerned	Moderately concerned	Moderately concerned	Very concerned	Somewhat likely	No	1982	United States of America	South Carolina
2019-10-25 09:12:00	2019-10-25 09:16:00	100	233	TRUE	2019-10-25 09:16:00	EN	Often (once a week)	Restaurant	Vaguely familiar	Moderately concerned	Not at all concerned	Extremely concerned	Extremely concerned	Moderately concerned	Extremely likely	No	1985	United States of America	North Carolina
2019-10-27 21:07:00	2019-10-27 21:27:00	100	1202	TRUE	2019-10-27 21:27:00	EN	Often (once a week)	Grocery store	Vaguely familiar	Moderately concerned	Slightly concerned	Moderately concerned	Slightly concerned	Moderately concerned	Somewhat unlikely	Yes	2001	United States of America	North Carolina
2019-11-21 16:37:00	2019-11-21 16:40:00	100	175	TRUE	2019-11-21 16:40:00	EN	Often (once a week)	Restaurant	Never heard of it	Moderately concerned	Very concerned	Slightly concerned	Slightly concerned	Moderately concerned	Neither likely nor unlikely	No	1947	United States of America	Pennsylvania
2020-03-01 13:23:00	2020-03-03 05:18:00	100	143690	TRUE	2020-03-03 05:18:00	EN	Sometimes (once or twice a month)	Restaurant	Vaguely familiar	Moderately concerned	Very concerned	Not at all concerned	Slightly concerned	Moderately concerned	Somewhat likely	No	1968	United States of America	North Carolina
2019-10-10 12:42:00	2019-10-10 12:44:00	100	115	TRUE	2019-10-10 12:44:00	EN	Sometimes (once or twice a month)	Restaurant	Never heard of it	Not at all concerned	Moderately concerned	Not at all concerned	Slightly concerned	Slightly concerned	Neither likely nor unlikely	Yes	2000	United States of America	Massachusetts
2019-10-10 12:48:00	2019-10-10 12:50:00	100	126	TRUE	2019-10-10 12:50:00	EN	Seldom (once or twice a year)	Restaurant	Never heard of it	Not at all concerned	Moderately concerned	Moderately concerned	Moderately concerned	Very concerned	Neither likely nor unlikely	Yes	1999	United States of America	Massachusetts
2019-10-10 12:52:00	2019-10-10 12:53:00	100	72	TRUE	2019-10-10 12:53:00	EN	Seldom (once or twice a year)	I do not purchase seafood	Vaguely familiar	Not at all concerned	Extremely concerned	Moderately concerned	Very concerned	Very concerned	Extremely unlikely	Yes	2000	United States of America	North Carolina
2019-10-10 12:52:00	2019-10-10 12:54:00	100	84	TRUE	2019-10-10 12:54:00	EN	Sometimes (once or twice a month)	Grocery store,Restaurant	Never heard of it	Not at all concerned	Slightly concerned	Slightly concerned	Moderately concerned	Moderately concerned	Somewhat likely	Yes	2000	United States of America	North Carolina
2019-10-10 13:00:00	2019-10-10 13:01:00	100	115	TRUE	2019-10-10 13:01:00	EN	Sometimes (once or twice a month)	Other	Vaguely familiar	Not at all concerned	Slightly concerned	Not at all concerned	Moderately concerned	Not at all concerned	Somewhat likely	Yes	2000	United States of America	North Carolina
2019-10-10 13:06:00	2019-10-10 13:10:00	100	212	TRUE	2019-10-10 13:10:00	EN	Sometimes (once or twice a month)	Grocery store,Restaurant	Never heard of it	Not at all concerned	Very concerned	Moderately concerned	Extremely concerned	Very concerned	Neither likely nor unlikely	Yes	1998	United States of America	North Carolina
2019-10-10 13:20:00	2019-10-10 13:22:00	100	116	TRUE	2019-10-10 13:22:00	EN	Sometimes (once or twice a month)	Seafood market,Restaurant	Never heard of it	Not at all concerned	Not at all concerned	Not at all concerned	Not at all concerned	Extremely concerned	Somewhat likely	Yes	1998	United States of America	North Carolina
2019-10-10 13:29:00	2019-10-10 13:31:00	100	106	TRUE	2019-10-10 13:31:00	EN	Very often (several times per week)	Seafood market,Grocery store,Restaurant	Vaguely familiar	Not at all concerned	Extremely concerned	Extremely concerned	Extremely concerned	Moderately concerned	Extremely likely	Yes	1999	Canada
2019-10-10 13:39:00	2019-10-10 13:41:00	100	112	TRUE	2019-10-10 13:41:00	EN	Often (once a week)	Seafood market,Grocery store,Restaurant	Vaguely familiar	Not at all concerned	Not at all concerned	Not at all concerned	Moderately concerned	Moderately concerned	Somewhat likely	Yes	2001	United States of America	North Carolina
2019-10-10 13:41:00	2019-10-10 13:43:00	100	104	TRUE	2019-10-10 13:43:00	EN	Sometimes (once or twice a month)	Restaurant	Never heard of it	Not at all concerned	Slightly concerned	Not at all concerned	Slightly concerned	Moderately concerned	Neither likely nor unlikely	Yes	2000	United States of America	North Carolina
2019-10-10 13:46:00	2019-10-10 13:47:00	100	76	TRUE	2019-10-10 13:47:00	EN	Never	I do not purchase seafood	Never heard of it	Not at all concerned	Extremely concerned	Extremely concerned	Extremely concerned	Extremely concerned	Extremely unlikely	Yes	2000	United States of America	North Carolina
2019-10-10 13:56:00	2019-10-10 13:57:00	100	70	TRUE	2019-10-10 13:57:00	EN	Never	I do not purchase seafood	Never heard of it	Not at all concerned	Extremely concerned	Extremely concerned	Extremely concerned	Extremely concerned	Extremely unlikely	Yes	1997	United States of America	North Carolina
2019-10-10 13:58:00	2019-10-10 14:00:00	100	165	TRUE	2019-10-10 14:00:00	EN	Sometimes (once or twice a month)	Grocery store,Restaurant	Never heard of it	Not at all concerned	Slightly concerned	Slightly concerned	Not at all concerned	Slightly concerned	Neither likely nor unlikely	Yes	2000	United States of America	North Carolina
2019-10-10 14:00:00	2019-10-10 14:02:00	100	72	TRUE	2019-10-10 14:02:00	EN	Very often (several times per week)	Grocery store	Never heard of it	Not at all concerned	Not at all concerned	Not at all concerned	Not at all concerned	Not at all concerned	Neither likely nor unlikely	Yes	1999	United States of America	North Carolina
2019-10-10 14:08:00	2019-10-10 14:11:00	100	135	TRUE	2019-10-10 14:11:00	EN	Often (once a week)	Other	Never heard of it	Not at all concerned	Very concerned	Not at all concerned	Moderately concerned	Moderately concerned	Neither likely nor unlikely	Yes	1999	United States of America	North Carolina
2019-10-10 14:12:00	2019-10-10 14:13:00	100	86	TRUE	2019-10-10 14:13:00	EN	Often (once a week)	Restaurant	Vaguely familiar	Not at all concerned	Slightly concerned	Not at all concerned	Moderately concerned	Not at all concerned	Extremely likely	Yes	2000	United States of America	Arizona
2019-10-10 14:43:00	2019-10-10 14:46:00	100	182	TRUE	2019-10-10 14:46:00	EN	Seldom (once or twice a year)	Restaurant	Never heard of it	Not at all concerned	Not at all concerned	Slightly concerned	Slightly concerned	Slightly concerned	Somewhat likely	No	1998	United States of America	North Carolina
2019-10-10 14:48:00	2019-10-10 14:50:00	100	125	TRUE	2019-10-10 14:50:00	EN	Sometimes (once or twice a month)	Grocery store	Very familiar	Not at all concerned	Slightly concerned	Moderately concerned	Slightly concerned	Slightly concerned	Neither likely nor unlikely	Yes	1998	United States of America	North Carolina
2019-10-10 15:04:00	2019-10-10 15:06:00	100	119	TRUE	2019-10-10 15:06:00	EN	Seldom (once or twice a year)	Grocery store	Never heard of it	Not at all concerned	Not at all concerned	Very concerned	Extremely concerned	Extremely concerned	Neither likely nor unlikely	No	1938	United States of America	North Carolina
2019-10-10 15:24:00	2019-10-10 15:26:00	100	145	TRUE	2019-10-10 15:26:00	EN	Never	I do not purchase seafood	Never heard of it	Not at all concerned	Moderately concerned	Slightly concerned	Moderately concerned	Moderately concerned	Neither likely nor unlikely	Yes	2001	United States of America	North Carolina
2019-10-10 15:28:00	2019-10-10 15:30:00	100	91	TRUE	2019-10-10 15:30:00	EN	Never	I do not purchase seafood	Never heard of it	Not at all concerned	Very concerned	Very concerned	Moderately concerned	Moderately concerned	Extremely unlikely	Yes	2000	United States of America	North Carolina
2019-10-10 15:33:00	2019-10-10 15:34:00	100	73	TRUE	2019-10-10 15:34:00	EN	Never	I do not purchase seafood	Never heard of it	Not at all concerned	Moderately concerned	Slightly concerned	Very concerned	Slightly concerned	Neither likely nor unlikely	Yes	1999	United States of America	North Carolina
2019-10-10 16:37:00	2019-10-10 16:39:00	100	91	TRUE	2019-10-10 16:39:00	EN	Seldom (once or twice a year)	Restaurant	Never heard of it	Not at all concerned	Not at all concerned	Not at all concerned	Not at all concerned	Very concerned	Neither likely nor unlikely	Yes	1996	United States of America	North Carolina
2019-10-10 16:54:00	2019-10-10 16:55:00	100	53	TRUE	2019-10-10 16:55:00	EN	Seldom (once or twice a year)	I do not purchase seafood	Never heard of it	Not at all concerned	Not at all concerned	Not at all concerned	Not at all concerned	Not at all concerned	Extremely unlikely	No	1895	Antigua and Barbuda	Colorado
2019-10-10 18:26:00	2019-10-10 18:28:00	100	128	TRUE	2019-10-10 18:28:00	EN	Sometimes (once or twice a month)	Restaurant	Never heard of it	Not at all concerned	Extremely concerned	Very concerned	Slightly concerned	Extremely concerned	Extremely likely	Yes	1998-06-29	United States of America	North Carolina
2019-10-10 19:58:00	2019-10-10 19:59:00	100	97	TRUE	2019-10-10 19:59:00	EN	Never	I do not purchase seafood	Never heard of it	Not at all concerned	Not at all concerned	Slightly concerned	Very concerned	Not at all concerned	Extremely unlikely	No	1990	United States of America	New York
2019-10-10 21:28:00	2019-10-10 21:31:00	100	160	TRUE	2019-10-10 21:31:00	EN	Never	I do not purchase seafood	Vaguely familiar	Not at all concerned	Moderately concerned	Slightly concerned	Moderately concerned	Moderately concerned	Extremely unlikely	Yes	1999	United States of America	North Carolina
2019-10-10 21:27:00	2019-10-10 21:37:00	100	560	TRUE	2019-10-10 21:37:00	EN	Sometimes (once or twice a month)	Seafood market	Vaguely familiar	Not at all concerned	Extremely concerned	Slightly concerned	Slightly concerned	Slightly concerned	Extremely likely	No	1970	United States of America	Connecticut
2019-10-10 22:10:00	2019-10-10 22:11:00	100	78	TRUE	2019-10-10 22:11:00	EN	Sometimes (once or twice a month)	Restaurant	Never heard of it	Not at all concerned	Moderately concerned	Extremely concerned	Extremely concerned	Very concerned	Somewhat likely	Yes	1999	United States of America	Tennessee
2019-10-11 01:29:00	2019-10-11 01:31:00	100	144	TRUE	2019-10-11 01:31:00	EN	Sometimes (once or twice a month)	Grocery store,Restaurant	Never heard of it	Not at all concerned	Not at all concerned	Not at all concerned	Slightly concerned	Moderately concerned	Neither likely nor unlikely	No	1969	United States of America	North Carolina
2019-10-11 02:21:00	2019-10-11 02:23:00	100	93	TRUE	2019-10-11 02:23:00	EN	Sometimes (once or twice a month)	Grocery store	Very familiar	Not at all concerned	Extremely concerned	Not at all concerned	Not at all concerned	Extremely concerned	Extremely likely	Yes	1997	United States of America	California
2019-10-11 03:47:00	2019-10-11 03:49:00	100	107	TRUE	2019-10-11 03:49:00	EN	Never	I do not purchase seafood	Never heard of it	Not at all concerned	Extremely concerned	Not at all concerned	Extremely concerned	Extremely concerned	Extremely unlikely	Yes	2001	United States of America	North Carolina
2019-10-11 04:44:00	2019-10-11 04:47:00	100	160	TRUE	2019-10-11 04:47:00	EN	Sometimes (once or twice a month)	Grocery store,Restaurant	Never heard of it	Not at all concerned	Slightly concerned	Not at all concerned	Slightly concerned	Moderately concerned	Neither likely nor unlikely	No	1994	United States of America	Oklahoma
2019-10-11 09:18:00	2019-10-11 09:21:00	100	136	TRUE	2019-10-11 09:21:00	EN	Seldom (once or twice a year)	Restaurant	Never heard of it	Not at all concerned	Not at all concerned	Moderately concerned	Very concerned	Moderately concerned	Somewhat likely	Yes	2001	United States of America	North Carolina
2019-10-11 09:53:00	2019-10-11 09:54:00	100	101	TRUE	2019-10-11 09:54:00	EN	Sometimes (once or twice a month)	Grocery store,Restaurant	Vaguely familiar	Not at all concerned	Not at all concerned	Slightly concerned	Slightly concerned	Slightly concerned	Somewhat likely	Yes	1986	United States of America	North Carolina
2019-10-11 09:53:00	2019-10-11 09:55:00	100	139	TRUE	2019-10-11 09:55:00	EN	Often (once a week)	Seafood market	Vaguely familiar	Not at all concerned	Not at all concerned	Moderately concerned	Very concerned	Not at all concerned	Neither likely nor unlikely	No	1952	United States of America	Michigan
2019-10-11 12:14:00	2019-10-11 12:16:00	100	109	TRUE	2019-10-11 12:16:00	EN	Seldom (once or twice a year)	Seafood market	Never heard of it	Not at all concerned	Very concerned	Moderately concerned	Very concerned	Very concerned	Neither likely nor unlikely	Yes	2001	United States of America	Tennessee
2019-10-11 12:45:00	2019-10-11 12:46:00	100	96	TRUE	2019-10-11 12:46:00	EN	Never	I do not purchase seafood	Vaguely familiar	Not at all concerned	Extremely concerned	Extremely concerned	Extremely concerned	Not at all concerned	Extremely unlikely	Yes	2001	United States of America	North Carolina
2019-10-11 13:02:00	2019-10-11 13:04:00	100	151	TRUE	2019-10-11 13:04:00	EN	Often (once a week)	Grocery store	Never heard of it	Not at all concerned	Slightly concerned	Slightly concerned	Slightly concerned	Moderately concerned	Somewhat likely	No	1966	United States of America	North Carolina
2019-10-11 15:16:00	2019-10-11 15:22:00	100	363	TRUE	2019-10-11 15:22:00	EN	Sometimes (once or twice a month)	Restaurant	Never heard of it	Not at all concerned	Not at all concerned	Not at all concerned	Not at all concerned	Not at all concerned	Neither likely nor unlikely	No	1943	United States of America	Pennsylvania
2019-10-11 16:24:00	2019-10-11 16:25:00	100	105	TRUE	2019-10-11 16:25:00	EN	Never	I do not purchase seafood	Never heard of it	Not at all concerned	Extremely concerned	Extremely concerned	Extremely concerned	Not at all concerned	Extremely unlikely	Yes	2001	United States of America	North Carolina
2019-10-12 01:04:00	2019-10-12 01:07:00	100	204	TRUE	2019-10-12 01:07:00	EN	Sometimes (once or twice a month)	Grocery store	Never heard of it	Not at all concerned	Slightly concerned	Slightly concerned	Very concerned	Slightly concerned	Somewhat likely	No	1967	United States of America	Minnesota
2019-10-12 07:05:00	2019-10-12 07:06:00	100	114	TRUE	2019-10-12 07:06:00	EN	Sometimes (once or twice a month)	Grocery store,Restaurant	Never heard of it	Not at all concerned	Extremely concerned	Not at all concerned	Extremely concerned	Extremely concerned	Somewhat likely	No	1986	United States of America	Minnesota
2019-10-13 01:18:00	2019-10-13 01:20:00	100	113	TRUE	2019-10-13 01:20:00	EN	Very often (several times per week)	Grocery store	Never heard of it	Not at all concerned	Slightly concerned	Slightly concerned	Slightly concerned	Very concerned	Extremely likely	No	1989	United States of America	California
2019-10-13 02:26:00	2019-10-13 02:27:00	100	77	TRUE	2019-10-13 02:27:00	EN	Often (once a week)	Grocery store,Restaurant	Vaguely familiar	Not at all concerned	Not at all concerned	Slightly concerned	Moderately concerned	Not at all concerned	Neither likely nor unlikely	Yes	1995	United States of America	North Carolina
2019-10-13 13:59:00	2019-10-13 14:12:00	100	738	TRUE	2019-10-13 14:12:00	EN	Very often (several times per week)	Other	Never heard of it	Not at all concerned	Moderately concerned	Moderately concerned	Slightly concerned	Extremely concerned	Neither likely nor unlikely	No	1998	Norway
2019-10-13 21:43:00	2019-10-13 21:46:00	100	223	TRUE	2019-10-13 21:46:00	EN	Sometimes (once or twice a month)	Restaurant	Vaguely familiar	Not at all concerned	Not at all concerned	Not at all concerned	Not at all concerned	Not at all concerned	Extremely unlikely	No	1964	United States of America	North Carolina
2019-10-14 00:17:00	2019-10-14 00:19:00	100	93	TRUE	2019-10-14 00:19:00	EN	Never	I do not purchase seafood	Never heard of it	Not at all concerned	Very concerned	Moderately concerned	Moderately concerned	Very concerned	Extremely unlikely	Yes	2000	United States of America	North Carolina
2019-10-14 14:29:00	2019-10-14 14:30:00	100	96	TRUE	2019-10-14 14:30:00	EN	Never	I do not purchase seafood	Vaguely familiar	Not at all concerned	Moderately concerned	Moderately concerned	Moderately concerned	Moderately concerned	Neither likely nor unlikely	Yes	2001	United States of America	Florida
2019-10-14 14:28:00	2019-10-14 14:31:00	100	137	TRUE	2019-10-14 14:31:00	EN	Sometimes (once or twice a month)	Restaurant	Never heard of it	Not at all concerned	Not at all concerned	Not at all concerned	Not at all concerned	Not at all concerned	Neither likely nor unlikely	No	1997	United States of America	District of Columbia
2019-10-14 14:40:00	2019-10-14 14:43:00	100	135	TRUE	2019-10-14 14:43:00	EN	Never	I do not purchase seafood	Vaguely familiar	Not at all concerned	Not at all concerned	Moderately concerned	Very concerned	Not at all concerned	Neither likely nor unlikely	Yes	2000	United States of America	North Carolina
2019-10-14 14:49:00	2019-10-14 14:52:00	100	163	TRUE	2019-10-14 14:52:00	EN	Never	I do not purchase seafood	Never heard of it	Not at all concerned	Not at all concerned	Not at all concerned	Moderately concerned	Not at all concerned	Extremely unlikely	Yes	1995	United States of America	Ohio
2019-10-14 15:07:00	2019-10-14 15:09:00	100	80	TRUE	2019-10-14 15:09:00	EN	Never	I do not purchase seafood	Never heard of it	Not at all concerned	Not at all concerned	Not at all concerned	Not at all concerned	Not at all concerned	Neither likely nor unlikely	Yes	1998	United States of America	North Carolina
2019-10-14 15:12:00	2019-10-14 15:15:00	100	191	TRUE	2019-10-14 15:15:00	EN	Never	I do not purchase seafood	Never heard of it	Not at all concerned	Extremely concerned	Moderately concerned	Extremely concerned	Moderately concerned	Extremely unlikely	Yes	2000	United States of America	North Carolina
2019-10-14 20:02:00	2019-10-14 20:03:00	100	71	TRUE	2019-10-14 20:03:00	EN	Never	I do not purchase seafood	Never heard of it	Not at all concerned	Very concerned	Slightly concerned	Very concerned	Moderately concerned	Neither likely nor unlikely	Yes	2000	United States of America	North Carolina
2019-10-14 21:43:00	2019-10-14 21:47:00	100	215	TRUE	2019-10-14 21:47:00	EN	Never	I do not purchase seafood	Never heard of it	Not at all concerned	Not at all concerned	Not at all concerned	Extremely concerned	Not at all concerned	Somewhat unlikely	No	1974	United States of America	North Carolina
2019-10-15 20:27:00	2019-10-15 20:28:00	100	84	TRUE	2019-10-15 20:28:00	EN	Very often (several times per week)	Grocery store,Restaurant	Vaguely familiar	Not at all concerned	Not at all concerned	Moderately concerned	Very concerned	Not at all concerned	Neither likely nor unlikely	Yes	2000	United States of America	North Carolina
2019-10-17 09:29:00	2019-10-17 09:32:00	100	141	TRUE	2019-10-17 09:32:00	EN	Sometimes (once or twice a month)	Seafood market,Grocery store,Restaurant,Other	Never heard of it	Not at all concerned	Not at all concerned	Very concerned	Extremely concerned	Very concerned	Somewhat unlikely	Yes	2001	United States of America	North Carolina
2019-10-22 20:13:00	2019-10-22 20:16:00	100	144	TRUE	2019-10-22 20:16:00	EN	Never	I do not purchase seafood	Never heard of it	Not at all concerned	Slightly concerned	Slightly concerned	Slightly concerned	Not at all concerned	Neither likely nor unlikely	No	1980	United States of America	North Carolina
2019-10-22 20:21:00	2019-10-22 20:24:00	100	149	TRUE	2019-10-22 20:24:00	EN	Very often (several times per week)	Grocery store,Restaurant	Very familiar	Not at all concerned	Moderately concerned	Not at all concerned	Not at all concerned	Extremely concerned	Somewhat unlikely	No	1985	United States of America	Hawaii
2019-10-24 13:13:00	2019-10-24 13:15:00	100	87	TRUE	2019-10-24 13:15:00	EN	Seldom (once or twice a year)	Restaurant	Never heard of it	Not at all concerned	Not at all concerned	Not at all concerned	Not at all concerned	Not at all concerned	Extremely likely	No	1978	United States of America	North Carolina
2019-10-10 12:38:00	2019-10-10 12:39:00	100	93	TRUE	2019-10-10 12:39:00	EN	Often (once a week)	Grocery store	Never heard of it	Slightly concerned	Moderately concerned	Moderately concerned	Moderately concerned	Moderately concerned	Somewhat likely	Yes	1999	United States of America	North Carolina
2019-10-10 12:41:00	2019-10-10 12:42:00	100	110	TRUE	2019-10-10 12:42:00	EN	Never	I do not purchase seafood	Vaguely familiar	Slightly concerned	Not at all concerned	Not at all concerned	Very concerned	Not at all concerned	Somewhat likely	No	1967	United States of America	North Carolina
2019-10-10 12:40:00	2019-10-10 12:43:00	100	147	TRUE	2019-10-10 12:43:00	EN	Seldom (once or twice a year)	Grocery store	Never heard of it	Slightly concerned	Extremely concerned	Not at all concerned	Slightly concerned	Moderately concerned	Neither likely nor unlikely	Yes	2000	United States of America	North Carolina
2019-10-10 12:42:00	2019-10-10 12:44:00	100	94	TRUE	2019-10-10 12:44:00	EN	Sometimes (once or twice a month)	Grocery store,Restaurant	Vaguely familiar	Slightly concerned	Very concerned	Very concerned	Very concerned	Moderately concerned	Somewhat likely	No	1971	United States of America	North Carolina
2019-10-10 12:45:00	2019-10-10 12:47:00	100	132	TRUE	2019-10-10 12:47:00	EN	Seldom (once or twice a year)	I do not purchase seafood	Never heard of it	Slightly concerned	Not at all concerned	Not at all concerned	Slightly concerned	Moderately concerned	Neither likely nor unlikely	No	1994	United States of America	North Carolina
2019-10-10 12:51:00	2019-10-10 12:53:00	100	130	TRUE	2019-10-10 12:53:00	EN	Often (once a week)	Grocery store,Restaurant,Other	Vaguely familiar	Slightly concerned	Very concerned	Slightly concerned	Extremely concerned	Moderately concerned	Extremely likely	Yes	2001	United States of America	North Carolina
2019-10-10 12:51:00	2019-10-10 12:54:00	100	207	TRUE	2019-10-10 12:54:00	EN	Never	I do not purchase seafood	Vaguely familiar	Slightly concerned	Moderately concerned	Not at all concerned	Moderately concerned	Moderately concerned	Extremely likely	Yes	2000	United States of America	Massachusetts
2019-10-10 12:54:00	2019-10-10 12:56:00	100	131	TRUE	2019-10-10 12:56:00	EN	Often (once a week)	Restaurant,Other	Never heard of it	Slightly concerned	Very concerned	Not at all concerned	Moderately concerned	Not at all concerned	Neither likely nor unlikely	Yes	2000	United States of America	North Carolina
2019-10-10 12:55:00	2019-10-10 12:56:00	100	77	TRUE	2019-10-10 12:56:00	EN	Sometimes (once or twice a month)	Seafood market,Grocery store	Vaguely familiar	Slightly concerned	Slightly concerned	Slightly concerned	Slightly concerned	Slightly concerned	Somewhat likely	Yes	2000	United States of America	Massachusetts
2019-10-10 13:01:00	2019-10-10 13:03:00	100	127	TRUE	2019-10-10 13:03:00	EN	Never	I do not purchase seafood	Never heard of it	Slightly concerned	Very concerned	Not at all concerned	Very concerned	Moderately concerned	Extremely unlikely	Yes	2000	United States of America	North Carolina
2019-10-10 13:03:00	2019-10-10 13:06:00	100	229	TRUE	2019-10-10 13:06:00	EN	Never	I do not purchase seafood	Vaguely familiar	Slightly concerned	Very concerned	Slightly concerned	Not at all concerned	Moderately concerned	Somewhat likely	Yes	2000	United States of America	North Carolina
2019-10-10 13:04:00	2019-10-10 13:07:00	100	186	TRUE	2019-10-10 13:07:00	EN	Often (once a week)	Grocery store,Restaurant	Vaguely familiar	Slightly concerned	Slightly concerned	Slightly concerned	Slightly concerned	Slightly concerned	Somewhat likely	No	1953	United States of America	Colorado
2019-10-10 13:08:00	2019-10-10 13:10:00	100	125	TRUE	2019-10-10 13:10:00	EN	Sometimes (once or twice a month)	Grocery store,Restaurant	Never heard of it	Slightly concerned	Moderately concerned	Slightly concerned	Slightly concerned	Moderately concerned	Neither likely nor unlikely	Yes	2000	United States of America	North Carolina
2019-10-10 13:09:00	2019-10-10 13:11:00	100	67	TRUE	2019-10-10 13:11:00	EN	Never	I do not purchase seafood	Vaguely familiar	Slightly concerned	Slightly concerned	Slightly concerned	Slightly concerned	Not at all concerned	Neither likely nor unlikely	Yes	2001	United States of America	Pennsylvania
2019-10-10 13:11:00	2019-10-10 13:14:00	100	154	TRUE	2019-10-10 13:14:00	EN	Often (once a week)	Grocery store,Restaurant	Never heard of it	Slightly concerned	Slightly concerned	Not at all concerned	Moderately concerned	Extremely concerned	Neither likely nor unlikely	Yes	1997	United States of America	North Carolina
2019-10-10 13:26:00	2019-10-10 13:29:00	100	180	TRUE	2019-10-10 13:29:00	EN	Sometimes (once or twice a month)	Restaurant	Never heard of it	Slightly concerned	Moderately concerned	Not at all concerned	Moderately concerned	Moderately concerned	Somewhat likely	No	1984	United States of America	North Carolina
2019-10-10 13:33:00	2019-10-10 13:35:00	100	106	TRUE	2019-10-10 13:35:00	EN	Sometimes (once or twice a month)	Grocery store,Restaurant	Vaguely familiar	Slightly concerned	Moderately concerned	Slightly concerned	Very concerned	Moderately concerned	Somewhat likely	Yes	2000	United States of America	Texas
2019-10-10 13:44:00	2019-10-10 13:45:00	100	84	TRUE	2019-10-10 13:45:00	EN	Often (once a week)	Seafood market,Grocery store,Restaurant	Very familiar	Slightly concerned	Not at all concerned	Very concerned	Very concerned	Very concerned	Extremely likely	No	1984	United States of America	Maryland
2019-10-10 13:23:00	2019-10-10 13:46:00	100	1326	TRUE	2019-10-10 13:46:00	EN	Sometimes (once or twice a month)	Restaurant	Very familiar	Slightly concerned	Extremely concerned	Very concerned	Extremely concerned	Extremely concerned	Extremely unlikely	Yes	1997	United States of America	North Carolina
2019-10-10 13:44:00	2019-10-10 13:47:00	100	146	TRUE	2019-10-10 13:47:00	EN	Often (once a week)	Seafood market,Grocery store,Restaurant	Vaguely familiar	Slightly concerned	Moderately concerned	Moderately concerned	Extremely concerned	Slightly concerned	Somewhat likely	Yes	2000	United States of America	North Carolina
2019-10-10 13:46:00	2019-10-10 13:49:00	100	134	TRUE	2019-10-10 13:49:00	EN	Never	I do not purchase seafood	Very familiar	Slightly concerned	Not at all concerned	Moderately concerned	Moderately concerned	Moderately concerned	Extremely unlikely	Yes	1998	United States of America	North Carolina
2019-10-10 13:48:00	2019-10-10 13:50:00	100	132	TRUE	2019-10-10 13:50:00	EN	Sometimes (once or twice a month)	Restaurant	Never heard of it	Slightly concerned	Moderately concerned	Moderately concerned	Slightly concerned	Slightly concerned	Neither likely nor unlikely	Yes	2001	United States of America	North Carolina
2019-10-10 13:49:00	2019-10-10 13:51:00	100	170	TRUE	2019-10-10 13:51:00	EN	Seldom (once or twice a year)	Restaurant	Never heard of it	Slightly concerned	Moderately concerned	Moderately concerned	Very concerned	Moderately concerned	Somewhat unlikely	Yes	1995	United States of America	California
2019-10-10 13:51:00	2019-10-10 13:54:00	100	186	TRUE	2019-10-10 13:54:00	EN	Sometimes (once or twice a month)	Restaurant	Never heard of it	Slightly concerned	Slightly concerned	Moderately concerned	Very concerned	Extremely concerned	Extremely unlikely	No	2001	United States of America	North Carolina
2019-10-10 13:53:00	2019-10-10 13:55:00	100	118	TRUE	2019-10-10 13:55:00	EN	Seldom (once or twice a year)	I do not purchase seafood	Never heard of it	Slightly concerned	Extremely concerned	Slightly concerned	Very concerned	Slightly concerned	Neither likely nor unlikely	Yes	2001	United States of America	North Carolina
2019-10-10 13:53:00	2019-10-10 13:55:00	100	116	TRUE	2019-10-10 13:55:00	EN	Sometimes (once or twice a month)	Grocery store,Restaurant	Vaguely familiar	Slightly concerned	Extremely concerned	Very concerned	Extremely concerned	Very concerned	Somewhat likely	Yes	2001	United States of America	North Carolina
2019-10-10 13:54:00	2019-10-10 13:55:00	100	87	TRUE	2019-10-10 13:55:00	EN	Often (once a week)	Grocery store,Restaurant	Vaguely familiar	Slightly concerned	Extremely concerned	Extremely concerned	Extremely concerned	Moderately concerned	Extremely likely	Yes	1998	United States of America	North Carolina
2019-10-10 13:54:00	2019-10-10 13:56:00	100	119	TRUE	2019-10-10 13:56:00	EN	Often (once a week)	Grocery store,Restaurant	Vaguely familiar	Slightly concerned	Very concerned	Slightly concerned	Moderately concerned	Moderately concerned	Somewhat likely	Yes	1999	United States of America	North Carolina
2019-10-10 13:56:00	2019-10-10 13:58:00	100	84	TRUE	2019-10-10 13:58:00	EN	Seldom (once or twice a year)	I do not purchase seafood	Never heard of it	Slightly concerned	Very concerned	Moderately concerned	Moderately concerned	Very concerned	Somewhat likely	Yes	2001	United States of America	North Carolina
2019-10-10 13:56:00	2019-10-10 13:58:00	100	136	TRUE	2019-10-10 13:58:00	EN	Often (once a week)	Grocery store	Never heard of it	Slightly concerned	Moderately concerned	Moderately concerned	Extremely concerned	Very concerned	Somewhat likely	No	1950	United States of America	Connecticut
2019-10-10 13:59:00	2019-10-10 14:02:00	100	175	TRUE	2019-10-10 14:02:00	EN	Often (once a week)	Grocery store,Restaurant	Never heard of it	Slightly concerned	Extremely concerned	Moderately concerned	Very concerned	Slightly concerned	Neither likely nor unlikely	Yes	1999	United States of America	Massachusetts
2019-10-10 14:02:00	2019-10-10 14:03:00	100	102	TRUE	2019-10-10 14:03:00	EN	Very often (several times per week)	Grocery store,Restaurant	Never heard of it	Slightly concerned	Extremely concerned	Moderately concerned	Very concerned	Moderately concerned	Somewhat likely	Yes	2000	United States of America	North Carolina
2019-10-10 14:09:00	2019-10-10 14:10:00	100	96	TRUE	2019-10-10 14:10:00	EN	Seldom (once or twice a year)	Grocery store,Restaurant	Never heard of it	Slightly concerned	Extremely concerned	Moderately concerned	Very concerned	Slightly concerned	Somewhat likely	Yes	1998	United States of America	North Carolina
2019-10-10 14:06:00	2019-10-10 14:14:00	100	450	TRUE	2019-10-10 14:14:00	EN	Seldom (once or twice a year)	Restaurant	Never heard of it	Slightly concerned	Extremely concerned	Very concerned	Extremely concerned	Extremely concerned	Neither likely nor unlikely	Yes	1999	United States of America	North Carolina
2019-10-10 14:17:00	2019-10-10 14:20:00	100	172	TRUE	2019-10-10 14:20:00	EN	Often (once a week)	Grocery store,Restaurant	Never heard of it	Slightly concerned	Extremely concerned	Slightly concerned	Extremely concerned	Extremely concerned	Somewhat likely	Yes	1998	United States of America	Kansas
2019-10-10 14:21:00	2019-10-10 14:23:00	100	80	TRUE	2019-10-10 14:23:00	EN	Never	I do not purchase seafood	Never heard of it	Slightly concerned	Very concerned	Moderately concerned	Extremely concerned	Extremely concerned	Extremely unlikely	Yes	2001	United States of America	North Carolina
2019-10-10 14:26:00	2019-10-10 14:27:00	100	81	TRUE	2019-10-10 14:27:00	EN	Seldom (once or twice a year)	Restaurant	Never heard of it	Slightly concerned	Not at all concerned	Very concerned	Very concerned	Very concerned	Neither likely nor unlikely	Yes	2001	United States of America	North Carolina
2019-10-10 14:26:00	2019-10-10 14:27:00	100	101	TRUE	2019-10-10 14:27:00	EN	Seldom (once or twice a year)	Grocery store	Never heard of it	Slightly concerned	Very concerned	Not at all concerned	Extremely concerned	Very concerned	Somewhat likely	No	2000	United States of America	North Carolina
2019-10-10 14:35:00	2019-10-10 14:36:00	100	92	TRUE	2019-10-10 14:36:00	EN	Sometimes (once or twice a month)	Grocery store	Vaguely familiar	Slightly concerned	Slightly concerned	Moderately concerned	Very concerned	Extremely concerned	Neither likely nor unlikely	Yes	1998	United States of America	North Carolina
2019-10-10 14:35:00	2019-10-10 14:36:00	100	79	TRUE	2019-10-10 14:36:00	EN	Never	Seafood market,Grocery store,Restaurant	Never heard of it	Slightly concerned	Moderately concerned	Very concerned	Extremely concerned	Slightly concerned	Extremely likely	No	1997	United States of America	North Carolina
2019-10-10 14:37:00	2019-10-10 14:42:00	100	260	TRUE	2019-10-10 14:42:00	EN	Very often (several times per week)	Grocery store	Vaguely familiar	Slightly concerned	Very concerned	Very concerned	Very concerned	Very concerned	Somewhat likely	Yes	1999	United States of America	North Carolina
2019-10-10 14:40:00	2019-10-10 14:42:00	100	119	TRUE	2019-10-10 14:42:00	EN	Never	I do not purchase seafood	Vaguely familiar	Slightly concerned	Slightly concerned	Extremely concerned	Extremely concerned	Not at all concerned	Extremely unlikely	Yes	1998	United States of America	North Carolina
2019-10-10 14:43:00	2019-10-10 14:46:00	100	202	TRUE	2019-10-10 14:46:00	EN	Often (once a week)	Grocery store,Restaurant	Never heard of it	Slightly concerned	Extremely concerned	Not at all concerned	Not at all concerned	Extremely concerned	Neither likely nor unlikely	No	1967	United States of America	North Carolina
2019-10-10 14:58:00	2019-10-10 15:00:00	100	107	TRUE	2019-10-10 15:00:00	EN	Sometimes (once or twice a month)	Seafood market,Grocery store,Restaurant	Vaguely familiar	Slightly concerned	Moderately concerned	Not at all concerned	Slightly concerned	Very concerned	Somewhat likely	No	1970	United States of America	New Jersey
2019-10-10 15:09:00	2019-10-10 15:12:00	100	170	TRUE	2019-10-10 15:12:00	EN	Sometimes (once or twice a month)	I do not purchase seafood	Never heard of it	Slightly concerned	Moderately concerned	Moderately concerned	Very concerned	Slightly concerned	Neither likely nor unlikely	Yes	2000	United States of America	North Carolina
2019-10-10 15:11:00	2019-10-10 15:12:00	100	90	TRUE	2019-10-10 15:12:00	EN	Seldom (once or twice a year)	Grocery store,Restaurant	Never heard of it	Slightly concerned	Very concerned	Slightly concerned	Extremely concerned	Very concerned	Somewhat likely	Yes	2000	United States of America	Pennsylvania
2019-10-10 15:22:00	2019-10-10 15:23:00	100	79	TRUE	2019-10-10 15:23:00	EN	Sometimes (once or twice a month)	Grocery store	Never heard of it	Slightly concerned	Very concerned	Not at all concerned	Slightly concerned	Not at all concerned	Somewhat unlikely	Yes	2000	United States of America	North Carolina
2019-10-10 15:22:00	2019-10-10 15:23:00	100	104	TRUE	2019-10-10 15:23:00	EN	Sometimes (once or twice a month)	Grocery store,Restaurant,Other	Never heard of it	Slightly concerned	Not at all concerned	Moderately concerned	Extremely concerned	Extremely concerned	Somewhat likely	Yes	2001	United States of America	North Carolina
2019-10-10 15:31:00	2019-10-10 15:33:00	100	72	TRUE	2019-10-10 15:33:00	EN	Sometimes (once or twice a month)	Grocery store,Restaurant	Very familiar	Slightly concerned	Moderately concerned	Slightly concerned	Extremely concerned	Moderately concerned	Extremely likely	Yes	1997	United States of America	North Carolina
2019-10-10 15:32:00	2019-10-10 15:35:00	100	173	TRUE	2019-10-10 15:35:00	EN	Sometimes (once or twice a month)	Grocery store	Never heard of it	Slightly concerned	Moderately concerned	Slightly concerned	Slightly concerned	Slightly concerned	Neither likely nor unlikely	Yes	2002	United States of America	North Carolina
2019-10-10 15:39:00	2019-10-10 15:41:00	100	117	TRUE	2019-10-10 15:41:00	EN	Often (once a week)	Grocery store	Vaguely familiar	Slightly concerned	Not at all concerned	Not at all concerned	Moderately concerned	Extremely concerned	Neither likely nor unlikely	Yes	2001	United States of America	North Carolina
2019-10-10 15:53:00	2019-10-10 15:55:00	100	116	TRUE	2019-10-10 15:55:00	EN	Seldom (once or twice a year)	Restaurant	Never heard of it	Slightly concerned	Moderately concerned	Not at all concerned	Moderately concerned	Moderately concerned	Extremely unlikely	Yes	1998	United States of America	North Carolina
2019-10-10 16:29:00	2019-10-10 16:30:00	100	55	TRUE	2019-10-10 16:30:00	EN	Never	I do not purchase seafood	Never heard of it	Slightly concerned	Extremely concerned	Extremely concerned	Extremely concerned	Extremely concerned	Neither likely nor unlikely	Yes	1997	United States of America
2019-10-10 16:41:00	2019-10-10 16:45:00	100	239	TRUE	2019-10-10 16:45:00	EN	Sometimes (once or twice a month)	Grocery store,Restaurant	Vaguely familiar	Slightly concerned	Moderately concerned	Moderately concerned	Very concerned	Very concerned	Neither likely nor unlikely	Yes	2001	United States of America	North Carolina
2019-10-10 16:45:00	2019-10-10 16:47:00	100	83	TRUE	2019-10-10 16:47:00	EN	Never	I do not purchase seafood	Never heard of it	Slightly concerned	Not at all concerned	Very concerned	Very concerned	Slightly concerned	Neither likely nor unlikely	Yes	2001	United States of America	North Carolina
2019-10-10 16:49:00	2019-10-10 16:52:00	100	148	TRUE	2019-10-10 16:52:00	EN	Often (once a week)	Seafood market,Grocery store,Restaurant	Vaguely familiar	Slightly concerned	Moderately concerned	Extremely concerned	Extremely concerned	Very concerned	Extremely likely	No	1998	United States of America	Montana
2019-10-10 17:05:00	2019-10-10 17:09:00	100	274	TRUE	2019-10-10 17:09:00	EN	Seldom (once or twice a year)	Restaurant	Vaguely familiar	Slightly concerned	Very concerned	Not at all concerned	Moderately concerned	Very concerned	Somewhat likely	No	1963	United States of America	North Carolina
2019-10-10 17:29:00	2019-10-10 17:32:00	100	132	TRUE	2019-10-10 17:32:00	EN	Sometimes (once or twice a month)	Restaurant	Never heard of it	Slightly concerned	Very concerned	Very concerned	Extremely concerned	Extremely concerned	Somewhat likely	Yes	1999	United States of America	Connecticut
2019-10-10 17:32:00	2019-10-10 17:34:00	100	108	TRUE	2019-10-10 17:34:00	EN	Sometimes (once or twice a month)	Restaurant	Never heard of it	Slightly concerned	Not at all concerned	Moderately concerned	Very concerned	Very concerned	Neither likely nor unlikely	Yes	1999	United States of America	North Carolina
2019-10-10 17:48:00	2019-10-10 17:52:00	100	200	TRUE	2019-10-10 17:52:00	EN	Often (once a week)	Restaurant	Vaguely familiar	Slightly concerned	Very concerned	Slightly concerned	Very concerned	Very concerned	Somewhat likely	No	1988	United States of America	North Carolina
2019-10-10 18:29:00	2019-10-10 18:31:00	100	90	TRUE	2019-10-10 18:31:00	EN	Sometimes (once or twice a month)	Grocery store,Restaurant,Other	Vaguely familiar	Slightly concerned	Not at all concerned	Moderately concerned	Moderately concerned	Moderately concerned	Somewhat likely	No	1991	United States of America	New York
2019-10-10 18:34:00	2019-10-10 18:36:00	100	111	TRUE	2019-10-10 18:36:00	EN	Seldom (once or twice a year)	I do not purchase seafood	Never heard of it	Slightly concerned	Extremely concerned	Slightly concerned	Moderately concerned	Very concerned	Neither likely nor unlikely	Yes	2001	United States of America	North Carolina
2019-10-10 18:34:00	2019-10-10 18:36:00	100	129	TRUE	2019-10-10 18:36:00	EN	Never	I do not purchase seafood	Never heard of it	Slightly concerned	Very concerned	Moderately concerned	Very concerned	Moderately concerned	Somewhat likely	Yes	2001	United States of America	North Carolina
2019-10-10 18:38:00	2019-10-10 18:40:00	100	115	TRUE	2019-10-10 18:40:00	EN	Sometimes (once or twice a month)	I do not purchase seafood	Vaguely familiar	Slightly concerned	Extremely concerned	Extremely concerned	Extremely concerned	Extremely concerned	Somewhat unlikely	Yes	1998	United States of America	North Carolina
2019-10-10 18:34:00	2019-10-10 18:50:00	100	955	TRUE	2019-10-10 18:50:00	EN	Very often (several times per week)	Grocery store,Restaurant	Never heard of it	Slightly concerned	Moderately concerned	Slightly concerned	Very concerned	Moderately concerned	Somewhat likely	Yes	2001	United States of America	North Carolina
2019-10-10 19:08:00	2019-10-10 19:09:00	100	114	TRUE	2019-10-10 19:09:00	EN	Sometimes (once or twice a month)	Restaurant	Never heard of it	Slightly concerned	Moderately concerned	Slightly concerned	Very concerned	Slightly concerned	Neither likely nor unlikely	Yes	2000	United States of America	North Carolina
2019-10-10 19:22:00	2019-10-10 19:25:00	100	165	TRUE	2019-10-10 19:25:00	EN	Sometimes (once or twice a month)	Grocery store	Never heard of it	Slightly concerned	Extremely concerned	Not at all concerned	Slightly concerned	Extremely concerned	Extremely likely	No	1977	United States of America	North Carolina
2019-10-10 19:31:00	2019-10-10 19:38:00	100	414	TRUE	2019-10-10 19:38:00	EN	Sometimes (once or twice a month)	Grocery store	Never heard of it	Slightly concerned	Very concerned	Slightly concerned	Slightly concerned	Slightly concerned	Neither likely nor unlikely	No	1992	United States of America	North Carolina
2019-10-10 19:54:00	2019-10-10 19:57:00	100	171	TRUE	2019-10-10 19:57:00	EN	Sometimes (once or twice a month)	Seafood market,Restaurant	Vaguely familiar	Slightly concerned	Moderately concerned	Slightly concerned	Very concerned	Very concerned	Extremely likely	No	1970	United States of America	North Carolina
2019-10-10 20:17:00	2019-10-10 20:19:00	100	151	TRUE	2019-10-10 20:19:00	EN	Sometimes (once or twice a month)	Restaurant	Never heard of it	Slightly concerned	Slightly concerned	Moderately concerned	Very concerned	Moderately concerned	Somewhat likely	No	1988	United States of America	North Carolina
2019-10-10 20:19:00	2019-10-10 20:21:00	100	130	TRUE	2019-10-10 20:21:00	EN	Sometimes (once or twice a month)	Restaurant	Vaguely familiar	Slightly concerned	Moderately concerned	Slightly concerned	Moderately concerned	Moderately concerned	Somewhat likely	No	1965	United States of America	North Carolina
2019-10-10 20:40:00	2019-10-10 20:44:00	100	230	TRUE	2019-10-10 20:44:00	EN	Seldom (once or twice a year)	Restaurant	Never heard of it	Slightly concerned	Very concerned	Moderately concerned	Slightly concerned	Moderately concerned	Neither likely nor unlikely	No	1974	United States of America	North Carolina
2019-10-10 20:47:00	2019-10-10 20:49:00	100	131	TRUE	2019-10-10 20:49:00	EN	Sometimes (once or twice a month)	Grocery store	Never heard of it	Slightly concerned	Slightly concerned	Not at all concerned	Moderately concerned	Very concerned	Somewhat likely	No	1984	United States of America	North Carolina
2019-10-10 21:15:00	2019-10-10 21:26:00	100	624	TRUE	2019-10-10 21:26:00	EN	Sometimes (once or twice a month)	Grocery store	Never heard of it	Slightly concerned	Slightly concerned	Not at all concerned	Slightly concerned	Moderately concerned	Somewhat likely	No	1975	United States of America	North Carolina
2019-10-10 21:45:00	2019-10-10 21:47:00	100	119	TRUE	2019-10-10 21:47:00	EN	Often (once a week)	Seafood market,Grocery store,Other,I do not purchase seafood	Vaguely familiar	Slightly concerned	Moderately concerned	Moderately concerned	Moderately concerned	Moderately concerned	Somewhat likely	Yes	2001	United States of America	North Carolina
2019-10-10 21:40:00	2019-10-10 21:47:00	100	377	TRUE	2019-10-10 22:02:00	EN	Sometimes (once or twice a month)	Grocery store,Restaurant	Never heard of it	Slightly concerned	Moderately concerned	Slightly concerned	Slightly concerned	Moderately concerned	Somewhat likely	No	1964	United States of America	Minnesota
2019-10-10 22:22:00	2019-10-10 22:24:00	100	138	TRUE	2019-10-10 22:24:00	EN	Sometimes (once or twice a month)	Restaurant	Vaguely familiar	Slightly concerned	Slightly concerned	Very concerned	Very concerned	Slightly concerned	Somewhat likely	No	1992	United States of America	Utah
2019-10-10 22:55:00	2019-10-10 22:59:00	100	247	TRUE	2019-10-10 22:59:00	EN	Often (once a week)	Grocery store	Never heard of it	Slightly concerned	Very concerned	Moderately concerned	Extremely concerned	Moderately concerned	Extremely likely	No	1951	United States of America
2019-10-10 23:04:00	2019-10-10 23:07:00	100	177	TRUE	2019-10-10 23:07:00	EN	Sometimes (once or twice a month)	Grocery store	Vaguely familiar	Slightly concerned	Moderately concerned	Moderately concerned	Very concerned	Very concerned	Somewhat likely	No	1972	United States of America	Minnesota
2019-10-10 23:54:00	2019-10-10 23:58:00	100	216	TRUE	2019-10-10 23:58:00	EN	Sometimes (once or twice a month)	Restaurant	Never heard of it	Slightly concerned	Very concerned	Not at all concerned	Moderately concerned	Slightly concerned	Somewhat likely	No	1998	United States of America	North Carolina
2019-10-11 01:57:00	2019-10-11 02:00:00	100	230	TRUE	2019-10-11 02:00:00	EN	Often (once a week)	Grocery store	Vaguely familiar	Slightly concerned	Slightly concerned	Not at all concerned	Very concerned	Moderately concerned	Neither likely nor unlikely	No	1954	United States of America	North Carolina
2019-10-11 06:11:00	2019-10-11 06:14:00	100	178	TRUE	2019-10-11 06:14:00	EN	Often (once a week)	Grocery store	Vaguely familiar	Slightly concerned	Very concerned	Moderately concerned	Moderately concerned	Moderately concerned	Somewhat likely	No	1974	United States of America	Florida
2019-10-11 07:07:00	2019-10-11 07:09:00	100	114	TRUE	2019-10-11 07:09:00	EN	Seldom (once or twice a year)	Restaurant	Never heard of it	Slightly concerned	Slightly concerned	Not at all concerned	Slightly concerned	Slightly concerned	Neither likely nor unlikely	No	1987	United States of America	North Carolina
2019-10-11 08:33:00	2019-10-11 08:35:00	100	149	TRUE	2019-10-11 08:35:00	EN	Often (once a week)	Grocery store	Never heard of it	Slightly concerned	Extremely concerned	Very concerned	Extremely concerned	Very concerned	Somewhat likely	Yes	1998	United States of America	South Carolina
2019-10-11 09:37:00	2019-10-11 09:39:00	100	91	TRUE	2019-10-11 09:39:00	EN	Sometimes (once or twice a month)	Grocery store,Restaurant	Never heard of it	Slightly concerned	Slightly concerned	Not at all concerned	Moderately concerned	Not at all concerned	Neither likely nor unlikely	Yes	1997	United States of America	North Carolina
2019-10-11 09:41:00	2019-10-11 09:48:00	100	383	TRUE	2019-10-11 09:48:00	EN	Sometimes (once or twice a month)	Grocery store,Restaurant	Vaguely familiar	Slightly concerned	Not at all concerned	Slightly concerned	Slightly concerned	Moderately concerned	Somewhat likely	Yes	1988	United States of America	North Carolina
2019-10-11 09:48:00	2019-10-11 09:49:00	100	100	TRUE	2019-10-11 09:49:00	EN	Sometimes (once or twice a month)	Grocery store	Never heard of it	Slightly concerned	Extremely concerned	Moderately concerned	Extremely concerned	Moderately concerned	Neither likely nor unlikely	No	1989	United Kingdom of Great Britain and Northern Ireland
2019-10-11 09:52:00	2019-10-11 09:54:00	100	121	TRUE	2019-10-11 09:54:00	EN	Sometimes (once or twice a month)	Grocery store,Restaurant	Vaguely familiar	Slightly concerned	Moderately concerned	Very concerned	Very concerned	Moderately concerned	Somewhat likely	No	1988	United States of America	North Carolina
2019-10-11 10:04:00	2019-10-11 10:06:00	100	126	TRUE	2019-10-11 10:06:00	EN	Often (once a week)	Seafood market,Grocery store,Restaurant	Never heard of it	Slightly concerned	Slightly concerned	Slightly concerned	Very concerned	Very concerned	Somewhat likely	No	1970	United States of America	North Carolina
2019-10-11 10:52:00	2019-10-11 10:53:00	100	91	TRUE	2019-10-11 10:53:00	EN	Sometimes (once or twice a month)	Grocery store,Restaurant	Vaguely familiar	Slightly concerned	Slightly concerned	Moderately concerned	Moderately concerned	Slightly concerned	Somewhat likely	No	1988	United States of America	North Carolina
2019-10-11 11:31:00	2019-10-11 11:33:00	100	94	TRUE	2019-10-11 11:33:00	EN	Seldom (once or twice a year)	Restaurant	Never heard of it	Slightly concerned	Slightly concerned	Very concerned	Very concerned	Moderately concerned	Somewhat likely	Yes	1994	United States of America	North Carolina
2019-10-11 12:19:00	2019-10-11 12:21:00	100	115	TRUE	2019-10-11 12:21:00	EN	Very often (several times per week)	Seafood market,Grocery store	Very familiar	Slightly concerned	Moderately concerned	Extremely concerned	Very concerned	Extremely concerned	Extremely likely	No	1985	United States of America	Washington
2019-10-11 12:49:00	2019-10-11 12:51:00	100	135	TRUE	2019-10-11 12:51:00	EN	Sometimes (once or twice a month)	Seafood market	Never heard of it	Slightly concerned	Very concerned	Slightly concerned	Moderately concerned	Moderately concerned	Somewhat likely	No	1989	Argentina
2019-10-11 12:49:00	2019-10-11 12:54:00	100	257	TRUE	2019-10-11 12:54:00	EN	Very often (several times per week)	Grocery store,Restaurant	Vaguely familiar	Slightly concerned	Very concerned	Slightly concerned	Slightly concerned	Slightly concerned	Extremely likely	No	1981	United States of America	North Carolina
2019-10-11 13:13:00	2019-10-11 13:15:00	100	159	TRUE	2019-10-11 13:16:00	EN	Very often (several times per week)	Seafood market,Grocery store,Restaurant	Vaguely familiar	Slightly concerned	Moderately concerned	Moderately concerned	Moderately concerned	Moderately concerned	Somewhat likely	No	1971	United States of America	North Carolina
2019-10-11 13:21:00	2019-10-11 13:26:00	100	273	TRUE	2019-10-11 13:26:00	EN	Never	I do not purchase seafood	Never heard of it	Slightly concerned	Slightly concerned	Moderately concerned	Moderately concerned	Not at all concerned	Somewhat unlikely	No	1973	United States of America	North Carolina
2019-10-11 13:46:00	2019-10-11 13:48:00	100	132	TRUE	2019-10-11 13:48:00	EN	Seldom (once or twice a year)	Grocery store	Vaguely familiar	Slightly concerned	Extremely concerned	Moderately concerned	Extremely concerned	Extremely concerned	Somewhat unlikely	No	1964	United States of America	Massachusetts
2019-10-11 13:56:00	2019-10-11 14:00:00	100	208	TRUE	2019-10-11 14:00:00	EN	Sometimes (once or twice a month)	Grocery store,Restaurant	Vaguely familiar	Slightly concerned	Extremely concerned	Slightly concerned	Very concerned	Very concerned	Somewhat unlikely	No	1977	United States of America	North Carolina
2019-10-11 14:03:00	2019-10-11 14:04:00	100	82	TRUE	2019-10-11 14:04:00	EN	Often (once a week)	Grocery store	Never heard of it	Slightly concerned	Extremely concerned	Extremely concerned	Extremely concerned	Moderately concerned	Extremely likely	No	1970	United Kingdom of Great Britain and Northern Ireland
2019-10-11 14:18:00	2019-10-11 14:20:00	100	117	TRUE	2019-10-11 14:20:00	EN	Often (once a week)	Grocery store	Vaguely familiar	Slightly concerned	Slightly concerned	Moderately concerned	Very concerned	Slightly concerned	Extremely likely	Yes	1998	United States of America	North Carolina
2019-10-11 14:35:00	2019-10-11 14:37:00	100	134	TRUE	2019-10-11 14:37:00	EN	Often (once a week)	Grocery store	Never heard of it	Slightly concerned	Not at all concerned	Not at all concerned	Not at all concerned	Slightly concerned	Neither likely nor unlikely	No	1977	United States of America	North Carolina
2019-10-11 16:23:00	2019-10-11 16:26:00	100	156	TRUE	2019-10-11 16:26:00	EN	Sometimes (once or twice a month)	Grocery store	Vaguely familiar	Slightly concerned	Very concerned	Slightly concerned	Slightly concerned	Very concerned	Somewhat unlikely	Yes	2001	United States of America	North Carolina
2019-10-11 16:36:00	2019-10-11 16:39:00	100	148	TRUE	2019-10-11 16:39:00	EN	Often (once a week)	Seafood market	Never heard of it	Slightly concerned	Very concerned	Moderately concerned	Very concerned	Very concerned	Extremely likely	No	1979	United States of America	North Carolina
2019-10-11 17:11:00	2019-10-11 17:13:00	100	120	TRUE	2019-10-11 17:13:00	EN	Sometimes (once or twice a month)	Grocery store,Restaurant,Other	Vaguely familiar	Slightly concerned	Moderately concerned	Very concerned	Very concerned	Moderately concerned	Extremely likely	No	1976	United States of America	North Carolina
2019-10-11 17:47:00	2019-10-11 17:53:00	100	353	TRUE	2019-10-11 17:53:00	EN	Sometimes (once or twice a month)	Grocery store,Restaurant	Never heard of it	Slightly concerned	Extremely concerned	Moderately concerned	Very concerned	Extremely concerned	Somewhat unlikely	No	1995	United States of America	South Carolina
2019-10-11 18:10:00	2019-10-11 18:13:00	100	147	TRUE	2019-10-11 18:13:00	EN	Often (once a week)	Grocery store,Other	Vaguely familiar	Slightly concerned	Not at all concerned	Extremely concerned	Extremely concerned	Slightly concerned	Neither likely nor unlikely	Yes	2001	United States of America	North Carolina
2019-10-11 18:57:00	2019-10-11 19:02:00	100	309	TRUE	2019-10-11 19:02:00	EN	Seldom (once or twice a year)	Seafood market	Vaguely familiar	Slightly concerned	Very concerned	Moderately concerned	Very concerned	Moderately concerned	Somewhat likely	No	1974	Argentina
2019-10-11 20:46:00	2019-10-11 20:51:00	100	277	TRUE	2019-10-11 20:51:00	EN	Sometimes (once or twice a month)	Restaurant	Never heard of it	Slightly concerned	Moderately concerned	Moderately concerned	Moderately concerned	Moderately concerned	Somewhat likely	No	1969	United States of America	North Carolina
2019-10-11 20:58:00	2019-10-11 21:00:00	100	132	TRUE	2019-10-11 21:00:00	EN	Never	I do not purchase seafood	Never heard of it	Slightly concerned	Very concerned	Extremely concerned	Very concerned	Moderately concerned	Extremely unlikely	Yes	2001	United States of America	North Carolina
2019-10-11 22:28:00	2019-10-11 22:30:00	100	135	TRUE	2019-10-11 22:30:00	EN	Sometimes (once or twice a month)	Restaurant	Never heard of it	Slightly concerned	Moderately concerned	Very concerned	Very concerned	Slightly concerned	Somewhat likely	No	1979	United States of America	Minnesota
2019-10-11 22:41:00	2019-10-11 22:43:00	100	118	TRUE	2019-10-11 22:43:00	EN	Often (once a week)	Seafood market,Grocery store,Restaurant	Never heard of it	Slightly concerned	Not at all concerned	Moderately concerned	Very concerned	Slightly concerned	Somewhat unlikely	No	1986	United States of America	Pennsylvania
2019-10-11 23:18:00	2019-10-11 23:20:00	100	116	TRUE	2019-10-11 23:20:00	EN	Sometimes (once or twice a month)	Grocery store	Never heard of it	Slightly concerned	Very concerned	Slightly concerned	Moderately concerned	Moderately concerned	Somewhat likely	No	1986	United States of America	Montana
2019-10-11 23:46:00	2019-10-11 23:48:00	100	144	TRUE	2019-10-11 23:48:00	EN	Sometimes (once or twice a month)	Grocery store	Never heard of it	Slightly concerned	Moderately concerned	Moderately concerned	Moderately concerned	Very concerned	Neither likely nor unlikely	No	1965	United States of America	North Carolina
2019-10-12 01:36:00	2019-10-12 01:39:00	100	139	TRUE	2019-10-12 01:39:00	EN	Sometimes (once or twice a month)	Seafood market,Grocery store,Restaurant	Never heard of it	Slightly concerned	Very concerned	Not at all concerned	Moderately concerned	Very concerned	Somewhat likely	No	1993	United States of America	North Carolina
2019-10-12 10:20:00	2019-10-12 10:22:00	100	149	TRUE	2019-10-12 10:22:00	EN	Sometimes (once or twice a month)	Grocery store,Restaurant	Never heard of it	Slightly concerned	Very concerned	Moderately concerned	Moderately concerned	Moderately concerned	Somewhat likely	No	1973	United States of America	Iowa
2019-10-12 10:45:00	2019-10-12 10:47:00	100	118	TRUE	2019-10-12 10:47:00	EN	Sometimes (once or twice a month)	Grocery store,Restaurant	Never heard of it	Slightly concerned	Extremely concerned	Extremely concerned	Moderately concerned	Not at all concerned	Somewhat likely	Yes	1995	United States of America	Florida
2019-10-12 14:44:00	2019-10-12 14:45:00	100	99	TRUE	2019-10-12 14:45:00	EN	Often (once a week)	Grocery store,Restaurant	Vaguely familiar	Slightly concerned	Not at all concerned	Slightly concerned	Moderately concerned	Very concerned	Somewhat likely	No	1981	United States of America	New York
2019-10-12 18:52:00	2019-10-12 18:55:00	100	167	TRUE	2019-10-12 18:55:00	EN	Sometimes (once or twice a month)	Grocery store	Never heard of it	Slightly concerned	Slightly concerned	Very concerned	Very concerned	Moderately concerned	Somewhat likely	No	1967	United States of America	Wisconsin
2019-10-12 22:22:00	2019-10-12 22:24:00	100	102	TRUE	2019-10-12 22:24:00	EN	Often (once a week)	Grocery store	Never heard of it	Slightly concerned	Slightly concerned	Extremely concerned	Extremely concerned	Extremely concerned	Somewhat unlikely	Yes	1996	United States of America	North Carolina
2019-10-13 01:25:00	2019-10-13 01:30:00	100	299	TRUE	2019-10-13 01:30:00	EN	Seldom (once or twice a year)	Grocery store,Restaurant,Other	Vaguely familiar	Slightly concerned	Very concerned	Very concerned	Very concerned	Moderately concerned	Neither likely nor unlikely	No	1950	United States of America	California
2019-10-13 10:46:00	2019-10-13 10:48:00	100	130	TRUE	2019-10-13 10:48:00	EN	Sometimes (once or twice a month)	Grocery store,Restaurant	Vaguely familiar	Slightly concerned	Not at all concerned	Not at all concerned	Very concerned	Moderately concerned	Somewhat likely	Yes	1991	United States of America	Colorado
2019-10-13 13:13:00	2019-10-13 13:15:00	100	98	TRUE	2019-10-13 13:15:00	EN	Sometimes (once or twice a month)	Restaurant	Vaguely familiar	Slightly concerned	Not at all concerned	Slightly concerned	Very concerned	Very concerned	Somewhat likely	Yes	1998	United States of America	South Carolina
2019-10-13 15:02:00	2019-10-13 15:05:00	100	175	TRUE	2019-10-13 15:05:00	EN	Often (once a week)	Grocery store,Restaurant	Never heard of it	Slightly concerned	Slightly concerned	Slightly concerned	Slightly concerned	Slightly concerned	Somewhat likely	No	1956	United States of America	North Carolina
2019-10-13 17:43:00	2019-10-13 17:45:00	100	128	TRUE	2019-10-13 17:45:00	EN	Sometimes (once or twice a month)	Restaurant	Never heard of it	Slightly concerned	Extremely concerned	Very concerned	Extremely concerned	Very concerned	Somewhat unlikely	No	1957	United States of America	North Carolina
2019-10-13 17:55:00	2019-10-13 17:57:00	100	108	TRUE	2019-10-13 17:57:00	EN	Never	I do not purchase seafood	Never heard of it	Slightly concerned	Very concerned	Moderately concerned	Extremely concerned	Very concerned	Somewhat likely	No	1996	United States of America	North Carolina
2019-10-13 22:01:00	2019-10-13 22:04:00	100	157	TRUE	2019-10-13 22:04:00	EN	Very often (several times per week)	Seafood market,Grocery store,Restaurant	Never heard of it	Slightly concerned	Not at all concerned	Not at all concerned	Not at all concerned	Slightly concerned	Neither likely nor unlikely	No	1956	United States of America	Ohio
2019-10-14 00:14:00	2019-10-14 00:15:00	100	107	TRUE	2019-10-14 00:15:00	EN	Sometimes (once or twice a month)	Grocery store,Restaurant	Never heard of it	Slightly concerned	Not at all concerned	Moderately concerned	Moderately concerned	Not at all concerned	Somewhat likely	No	1983	United States of America	Florida
2019-10-14 05:38:00	2019-10-14 05:40:00	100	127	TRUE	2019-10-14 05:40:00	EN	Sometimes (once or twice a month)	Restaurant	Vaguely familiar	Slightly concerned	Slightly concerned	Slightly concerned	Slightly concerned	Slightly concerned	Somewhat likely	No	1994	United States of America	Virginia
2019-10-14 06:39:00	2019-10-14 06:40:00	100	86	TRUE	2019-10-14 06:40:00	EN	Sometimes (once or twice a month)	Restaurant	Very familiar	Slightly concerned	Extremely concerned	Very concerned	Extremely concerned	Extremely concerned	Neither likely nor unlikely	Yes	2001	United States of America	North Carolina
2019-10-14 11:22:00	2019-10-14 11:24:00	100	111	TRUE	2019-10-14 11:24:00	EN	Sometimes (once or twice a month)	Restaurant	Very familiar	Slightly concerned	Moderately concerned	Very concerned	Moderately concerned	Slightly concerned	Somewhat likely	No	1971	United States of America	North Carolina
2019-10-14 11:35:00	2019-10-14 11:37:00	100	121	TRUE	2019-10-14 11:37:00	EN	Sometimes (once or twice a month)	Seafood market,Grocery store	Vaguely familiar	Slightly concerned	Not at all concerned	Slightly concerned	Moderately concerned	Moderately concerned	Somewhat likely	No	1984	United States of America	North Carolina
2019-10-14 12:18:00	2019-10-14 12:21:00	100	178	TRUE	2019-10-14 12:21:00	EN	Sometimes (once or twice a month)	Restaurant	Never heard of it	Slightly concerned	Slightly concerned	Slightly concerned	Very concerned	Slightly concerned	Somewhat likely	No	1988	United States of America	North Carolina
2019-10-14 12:19:00	2019-10-14 12:22:00	100	134	TRUE	2019-10-14 12:22:00	EN	Seldom (once or twice a year)	Restaurant	Vaguely familiar	Slightly concerned	Not at all concerned	Moderately concerned	Extremely concerned	Extremely concerned	Neither likely nor unlikely	No	1991	United States of America	North Carolina
2019-10-14 13:54:00	2019-10-14 13:58:00	100	213	TRUE	2019-10-14 13:58:00	EN	Sometimes (once or twice a month)	Grocery store	Never heard of it	Slightly concerned	Slightly concerned	Moderately concerned	Extremely concerned	Very concerned	Neither likely nor unlikely	No	1982	United States of America	Georgia
2019-10-14 13:57:00	2019-10-14 13:58:00	100	93	TRUE	2019-10-14 13:58:00	EN	Never	I do not purchase seafood	Vaguely familiar	Slightly concerned	Very concerned	Moderately concerned	Moderately concerned	Slightly concerned	Somewhat likely	Yes	1999	United States of America	North Carolina
2019-10-14 14:06:00	2019-10-14 14:07:00	100	56	TRUE	2019-10-14 14:07:00	EN	Never	I do not purchase seafood	Never heard of it	Slightly concerned	Slightly concerned	Not at all concerned	Moderately concerned	Not at all concerned	Somewhat unlikely	Yes	2000	United States of America	North Carolina
2019-10-14 14:06:00	2019-10-14 14:09:00	100	128	TRUE	2019-10-14 14:09:00	EN	Often (once a week)	Grocery store	Never heard of it	Slightly concerned	Very concerned	Slightly concerned	Moderately concerned	Not at all concerned	Somewhat unlikely	Yes	1997	United States of America	Georgia
2019-10-14 14:35:00	2019-10-14 14:38:00	100	146	TRUE	2019-10-14 14:38:00	EN	Often (once a week)	Grocery store,Other	Vaguely familiar	Slightly concerned	Very concerned	Very concerned	Extremely concerned	Moderately concerned	Somewhat likely	Yes	2000	United States of America	North Carolina
2019-10-14 14:41:00	2019-10-14 14:44:00	100	222	TRUE	2019-10-14 14:44:00	EN	Never	I do not purchase seafood	Vaguely familiar	Slightly concerned	Slightly concerned	Extremely concerned	Moderately concerned	Extremely concerned	Neither likely nor unlikely	Yes	2001	United States of America	Florida
2019-10-14 14:46:00	2019-10-14 14:48:00	100	112	TRUE	2019-10-14 14:48:00	EN	Sometimes (once or twice a month)	Grocery store	Never heard of it	Slightly concerned	Moderately concerned	Slightly concerned	Moderately concerned	Moderately concerned	Neither likely nor unlikely	Yes	1998	United States of America	North Carolina
2019-10-14 14:50:00	2019-10-14 14:52:00	100	115	TRUE	2019-10-14 14:52:00	EN	Often (once a week)	Grocery store	Never heard of it	Slightly concerned	Moderately concerned	Moderately concerned	Moderately concerned	Slightly concerned	Somewhat likely	No	1995	United States of America	Virginia
2019-10-14 14:50:00	2019-10-14 14:52:00	100	154	TRUE	2019-10-14 14:52:00	EN	Often (once a week)	Grocery store,Restaurant	Never heard of it	Slightly concerned	Very concerned	Moderately concerned	Extremely concerned	Very concerned	Neither likely nor unlikely	Yes	2000	United States of America	North Carolina
2019-10-14 16:43:00	2019-10-14 16:49:00	100	349	TRUE	2019-10-14 16:49:00	EN	Sometimes (once or twice a month)	Restaurant	Vaguely familiar	Slightly concerned	Slightly concerned	Slightly concerned	Slightly concerned	Slightly concerned	Somewhat likely	Yes	1999	Philippines	Nevada
2019-10-14 18:08:00	2019-10-14 18:09:00	100	92	TRUE	2019-10-14 18:09:00	EN	Never	I do not purchase seafood	Never heard of it	Slightly concerned	Extremely concerned	Slightly concerned	Moderately concerned	Not at all concerned	Somewhat likely	No	1996	United States of America	North Carolina
2019-10-14 19:17:00	2019-10-14 19:19:00	100	103	TRUE	2019-10-14 19:19:00	EN	Very often (several times per week)	Grocery store	Vaguely familiar	Slightly concerned	Extremely concerned	Moderately concerned	Extremely concerned	Slightly concerned	Somewhat unlikely	Yes	1996	United States of America	North Carolina
2019-10-14 19:26:00	2019-10-14 19:28:00	100	133	TRUE	2019-10-14 19:28:00	EN	Sometimes (once or twice a month)	Grocery store,Restaurant	Never heard of it	Slightly concerned	Very concerned	Moderately concerned	Moderately concerned	Very concerned	Somewhat likely	Yes	1992	United States of America	Pennsylvania
2019-10-14 19:50:00	2019-10-14 19:52:00	100	140	TRUE	2019-10-14 19:52:00	EN	Sometimes (once or twice a month)	Restaurant	Never heard of it	Slightly concerned	Extremely concerned	Extremely concerned	Extremely concerned	Extremely concerned	Somewhat likely	Yes	2000	United States of America	North Carolina
2019-10-14 20:24:00	2019-10-14 20:26:00	100	148	TRUE	2019-10-14 20:26:00	EN	Sometimes (once or twice a month)	Grocery store,Restaurant	Vaguely familiar	Slightly concerned	Moderately concerned	Moderately concerned	Moderately concerned	Slightly concerned	Somewhat likely	No	1961	United States of America	North Carolina
2019-10-14 21:07:00	2019-10-14 21:09:00	100	110	TRUE	2019-10-14 21:09:00	EN	Sometimes (once or twice a month)	Seafood market,Grocery store,Restaurant	Vaguely familiar	Slightly concerned	Very concerned	Slightly concerned	Very concerned	Slightly concerned	Neither likely nor unlikely	Yes	1982	United States of America	North Carolina
2019-10-14 21:48:00	2019-10-14 21:50:00	100	106	TRUE	2019-10-14 21:50:00	EN	Sometimes (once or twice a month)	Restaurant	Very familiar	Slightly concerned	Not at all concerned	Very concerned	Very concerned	Moderately concerned	Somewhat likely	No	1996	United States of America	North Carolina
2019-10-14 21:58:00	2019-10-14 22:01:00	100	161	TRUE	2019-10-14 22:01:00	EN	Sometimes (once or twice a month)	Grocery store	Never heard of it	Slightly concerned	Moderately concerned	Slightly concerned	Extremely concerned	Very concerned	Somewhat likely	No	1997	United States of America	North Carolina
2019-10-15 11:02:00	2019-10-15 11:04:00	100	150	TRUE	2019-10-15 11:04:00	EN	Sometimes (once or twice a month)	Grocery store,Restaurant	Never heard of it	Slightly concerned	Extremely concerned	Very concerned	Very concerned	Slightly concerned	Neither likely nor unlikely	No	1964	United States of America	North Carolina
2019-10-16 04:42:00	2019-10-16 04:44:00	100	148	TRUE	2019-10-16 04:44:00	EN	Sometimes (once or twice a month)	Restaurant	Vaguely familiar	Slightly concerned	Slightly concerned	Slightly concerned	Slightly concerned	Moderately concerned	Somewhat likely	Yes	1998	United States of America	North Carolina
2019-10-16 15:29:00	2019-10-16 15:31:00	100	73	TRUE	2019-10-16 15:31:00	EN	Often (once a week)	Grocery store	Never heard of it	Slightly concerned	Very concerned	Very concerned	Very concerned	Very concerned	Somewhat likely	Yes	1999	United States of America	North Carolina
2019-10-16 16:13:00	2019-10-16 16:15:00	100	114	TRUE	2019-10-16 16:15:00	EN	Never	I do not purchase seafood	Vaguely familiar	Slightly concerned	Moderately concerned	Slightly concerned	Extremely concerned	Very concerned	Somewhat likely	Yes	2001	United States of America	North Carolina
2019-10-16 21:38:00	2019-10-16 21:41:00	100	196	TRUE	2019-10-16 21:41:00	EN	Seldom (once or twice a year)	Grocery store	Never heard of it	Slightly concerned	Very concerned	Not at all concerned	Very concerned	Moderately concerned	Somewhat likely	No	1959	United States of America	North Carolina
2019-10-17 07:43:00	2019-10-17 07:44:00	100	96	TRUE	2019-10-17 07:44:00	EN	Sometimes (once or twice a month)	Restaurant	Very familiar	Slightly concerned	Moderately concerned	Moderately concerned	Moderately concerned	Not at all concerned	Somewhat unlikely	No	1997	Viet Nam	I do not reside in the United States
2019-10-17 10:49:00	2019-10-17 10:53:00	100	200	TRUE	2019-10-17 10:53:00	EN	Sometimes (once or twice a month)	I do not purchase seafood	Never heard of it	Slightly concerned	Moderately concerned	Moderately concerned	Moderately concerned	Very concerned	Somewhat unlikely	Yes	2001	United States of America	North Carolina
2019-10-18 20:47:00	2019-10-18 20:52:00	100	287	TRUE	2019-10-18 20:52:00	EN	Sometimes (once or twice a month)	Restaurant	Never heard of it	Slightly concerned	Moderately concerned	Slightly concerned	Moderately concerned	Slightly concerned	Somewhat likely	Yes	1999	United States of America	North Carolina
2019-10-19 12:01:00	2019-10-19 12:04:00	100	178	TRUE	2019-10-19 12:04:00	EN	Very often (several times per week)	Grocery store,Restaurant	Never heard of it	Slightly concerned	Not at all concerned	Not at all concerned	Slightly concerned	Slightly concerned	Neither likely nor unlikely	No	1965	United States of America	North Carolina
2019-10-21 08:41:00	2019-10-21 08:43:00	100	119	TRUE	2019-10-21 08:43:00	EN	Often (once a week)	Seafood market,Grocery store,Restaurant	Vaguely familiar	Slightly concerned	Slightly concerned	Moderately concerned	Moderately concerned	Moderately concerned	Somewhat likely	No	1985	United States of America	North Carolina
2019-10-23 17:41:00	2019-10-23 17:44:00	100	198	TRUE	2019-10-23 17:44:00	EN	Seldom (once or twice a year)	Restaurant	Never heard of it	Slightly concerned	Very concerned	Very concerned	Extremely concerned	Very concerned	Somewhat likely	No	1983	United States of America	North Carolina
2019-10-24 13:43:00	2019-10-24 13:47:00	100	186	TRUE	2019-10-24 13:47:00	EN	Seldom (once or twice a year)	Grocery store	Vaguely familiar	Slightly concerned	Slightly concerned	Slightly concerned	Moderately concerned	Moderately concerned	Somewhat likely	No	1955	United States of America	New Mexico
2019-10-25 08:07:00	2019-10-25 08:11:00	100	199	TRUE	2019-10-25 08:11:00	EN	Often (once a week)	Other	Never heard of it	Slightly concerned	Moderately concerned	Slightly concerned	Moderately concerned	Moderately concerned	Somewhat likely	Yes	1999	United States of America	North Carolina
2019-10-25 16:27:00	2019-10-25 16:55:00	100	1665	TRUE	2019-10-25 16:55:00	EN	Sometimes (once or twice a month)	Grocery store,Restaurant	Never heard of it	Slightly concerned	Slightly concerned	Slightly concerned	Slightly concerned	Moderately concerned	Somewhat likely	No	1968	United States of America	North Carolina
2019-10-31 19:20:00	2019-10-31 19:21:00	100	90	TRUE	2019-10-31 19:21:00	EN	Seldom (once or twice a year)	Restaurant	Never heard of it	Slightly concerned	Slightly concerned	Extremely concerned	Extremely concerned	Extremely concerned	Extremely unlikely	No	1995	United States of America	North Carolina
2019-11-09 19:28:00	2019-11-09 19:30:00	100	121	TRUE	2019-11-09 19:30:00	EN	Often (once a week)	Restaurant,Other	Vaguely familiar	Slightly concerned	Slightly concerned	Moderately concerned	Very concerned	Moderately concerned	Somewhat unlikely	Yes	2001	United States of America	North Carolina
2019-10-10 08:47:00	2019-10-10 08:49:00	100	104	TRUE	2019-10-10 08:49:00	EN	Sometimes (once or twice a month)	Grocery store,Restaurant	Very familiar	Very concerned	Very concerned	Very concerned	Very concerned	Very concerned	Extremely likely	Yes	2000	United States of America	North Carolina
2019-10-10 11:22:00	2019-10-10 11:24:00	100	117	TRUE	2019-10-10 11:24:00	EN	Very often (several times per week)	Restaurant	Very familiar	Very concerned	Extremely concerned	Extremely concerned	Extremely concerned	Extremely concerned	Somewhat likely	Yes	2001	United States of America	North Carolina
2019-10-10 11:59:00	2019-10-10 12:01:00	100	95	TRUE	2019-10-10 12:01:00	EN	Sometimes (once or twice a month)	Restaurant	Vaguely familiar	Very concerned	Extremely concerned	Extremely concerned	Very concerned	Moderately concerned	Somewhat likely	Yes	2000	United States of America	North Carolina
2019-10-10 12:36:00	2019-10-10 12:38:00	100	113	TRUE	2019-10-10 12:38:00	EN	Often (once a week)	Grocery store,Restaurant,Other	Very familiar	Very concerned	Moderately concerned	Very concerned	Very concerned	Moderately concerned	Extremely likely	Yes	2000	United States of America	Massachusetts
2019-10-10 12:40:00	2019-10-10 12:41:00	100	83	TRUE	2019-10-10 12:41:00	EN	Never	I do not purchase seafood	Vaguely familiar	Very concerned	Very concerned	Moderately concerned	Very concerned	Moderately concerned	Extremely unlikely	Yes	2000	United States of America	North Carolina
2019-10-10 12:43:00	2019-10-10 12:45:00	100	120	TRUE	2019-10-10 12:45:00	EN	Very often (several times per week)	Grocery store	Vaguely familiar	Very concerned	Extremely concerned	Very concerned	Extremely concerned	Moderately concerned	Extremely likely	No	1957	United States of America	North Carolina
2019-10-10 12:42:00	2019-10-10 12:45:00	100	181	TRUE	2019-10-10 12:45:00	EN	Sometimes (once or twice a month)	Restaurant	Never heard of it	Very concerned	Very concerned	Very concerned	Extremely concerned	Extremely concerned	Somewhat likely	No	1977	United States of America	North Carolina
2019-10-10 12:44:00	2019-10-10 12:46:00	100	153	TRUE	2019-10-10 12:46:00	EN	Often (once a week)	Grocery store	Very familiar	Very concerned	Extremely concerned	Not at all concerned	Extremely concerned	Extremely concerned	Extremely likely	No	1953	United States of America	North Carolina
2019-10-10 12:46:00	2019-10-10 12:47:00	100	76	TRUE	2019-10-10 12:47:00	EN	Often (once a week)	Seafood market,Grocery store,Restaurant	Very familiar	Very concerned	Moderately concerned	Very concerned	Very concerned	Moderately concerned	Somewhat likely	Yes	1998	United States of America	North Carolina
2019-10-10 12:50:00	2019-10-10 12:53:00	100	188	TRUE	2019-10-10 12:53:00	EN	Sometimes (once or twice a month)	Grocery store	Vaguely familiar	Very concerned	Very concerned	Moderately concerned	Moderately concerned	Very concerned	Somewhat likely	Yes	1993	United States of America	North Carolina
2019-10-10 12:53:00	2019-10-10 12:55:00	100	106	TRUE	2019-10-10 12:55:00	EN	Often (once a week)	Grocery store,Restaurant	Vaguely familiar	Very concerned	Very concerned	Very concerned	Very concerned	Moderately concerned	Extremely likely	Yes	2000	United States of America	North Carolina
2019-10-10 12:56:00	2019-10-10 12:58:00	100	76	TRUE	2019-10-10 12:58:00	EN	Sometimes (once or twice a month)	I do not purchase seafood	Very familiar	Very concerned	Very concerned	Moderately concerned	Extremely concerned	Very concerned	Somewhat likely	Yes	2000	United States of America	North Carolina
2019-10-10 12:56:00	2019-10-10 12:58:00	100	122	TRUE	2019-10-10 12:58:00	EN	Sometimes (once or twice a month)	Restaurant	Never heard of it	Very concerned	Extremely concerned	Very concerned	Extremely concerned	Extremely concerned	Extremely likely	Yes	1998	United States of America	Tennessee
2019-10-10 12:55:00	2019-10-10 12:59:00	100	253	TRUE	2019-10-10 12:59:00	EN	Sometimes (once or twice a month)	Grocery store	Vaguely familiar	Very concerned	Extremely concerned	Extremely concerned	Extremely concerned	Very concerned	Extremely likely	No	1979	United States of America	North Carolina
2019-10-10 12:57:00	2019-10-10 12:59:00	100	113	TRUE	2019-10-10 12:59:00	EN	Often (once a week)	Grocery store	Vaguely familiar	Very concerned	Not at all concerned	Extremely concerned	Extremely concerned	Very concerned	Somewhat likely	Yes	2000	United States of America	North Carolina
2019-10-10 12:59:00	2019-10-10 13:02:00	100	183	TRUE	2019-10-10 13:02:00	EN	Often (once a week)	Seafood market,Grocery store	Vaguely familiar	Very concerned	Very concerned	Very concerned	Very concerned	Very concerned	Somewhat likely	Yes	2001	United States of America	North Carolina
2019-10-10 12:59:00	2019-10-10 13:02:00	100	167	TRUE	2019-10-10 13:02:00	EN	Sometimes (once or twice a month)	Restaurant	Never heard of it	Very concerned	Very concerned	Moderately concerned	Moderately concerned	Very concerned	Neither likely nor unlikely	No	1996	United States of America	North Carolina
2019-10-10 13:02:00	2019-10-10 13:06:00	100	190	TRUE	2019-10-10 13:06:00	EN	Sometimes (once or twice a month)	Seafood market,Grocery store,Restaurant	Very familiar	Very concerned	Very concerned	Very concerned	Very concerned	Very concerned	Extremely likely	Yes	1991	United States of America	Rhode Island
2019-10-10 13:13:00	2019-10-10 13:15:00	100	121	TRUE	2019-10-10 13:15:00	EN	Often (once a week)	Seafood market,Other	Vaguely familiar	Very concerned	Slightly concerned	Not at all concerned	Moderately concerned	Extremely concerned	Somewhat likely	Yes	2000	United States of America	North Carolina
2019-10-10 13:34:00	2019-10-10 13:37:00	100	194	TRUE	2019-10-10 13:37:00	EN	Sometimes (once or twice a month)	Grocery store,Restaurant	Very familiar	Very concerned	Slightly concerned	Moderately concerned	Extremely concerned	Moderately concerned	Somewhat likely	Yes	1999	United States of America	North Carolina
2019-10-10 13:38:00	2019-10-10 13:40:00	100	143	TRUE	2019-10-10 13:40:00	EN	Sometimes (once or twice a month)	Grocery store	Vaguely familiar	Very concerned	Extremely concerned	Very concerned	Very concerned	Very concerned	Extremely likely	No	1971	United States of America	Connecticut
2019-10-10 13:37:00	2019-10-10 13:42:00	100	282	TRUE	2019-10-10 13:42:00	EN	Sometimes (once or twice a month)	Grocery store,Restaurant	Vaguely familiar	Very concerned	Very concerned	Extremely concerned	Extremely concerned	Moderately concerned	Extremely likely	Yes	1986	United States of America	Maryland
2019-10-10 13:42:00	2019-10-10 13:44:00	100	121	TRUE	2019-10-10 13:44:00	EN	Often (once a week)	Grocery store	Vaguely familiar	Very concerned	Extremely concerned	Extremely concerned	Very concerned	Very concerned	Extremely likely	No	1980	United States of America	Florida
2019-10-10 13:44:00	2019-10-10 13:46:00	100	129	TRUE	2019-10-10 13:46:00	EN	Often (once a week)	Grocery store,Restaurant	Never heard of it	Very concerned	Very concerned	Very concerned	Very concerned	Slightly concerned	Neither likely nor unlikely	Yes	2000	United States of America	Washington
2019-10-10 13:49:00	2019-10-10 13:52:00	100	170	TRUE	2019-10-10 13:52:00	EN	Often (once a week)	Restaurant	Never heard of it	Very concerned	Extremely concerned	Extremely concerned	Extremely concerned	Very concerned	Somewhat unlikely	No	1991	United States of America	North Carolina
2019-10-10 13:51:00	2019-10-10 13:52:00	100	69	TRUE	2019-10-10 13:52:00	EN	Very often (several times per week)	Restaurant	Very familiar	Very concerned	Not at all concerned	Extremely concerned	Extremely concerned	Moderately concerned	Somewhat likely	Yes	2001	United States of America	North Carolina
2019-10-10 13:52:00	2019-10-10 13:54:00	100	117	TRUE	2019-10-10 13:54:00	EN	Often (once a week)	Grocery store	Vaguely familiar	Very concerned	Very concerned	Very concerned	Very concerned	Very concerned	Extremely likely	No	1992	United States of America	Illinois
2019-10-10 13:52:00	2019-10-10 13:54:00	100	100	TRUE	2019-10-10 13:54:00	EN	Sometimes (once or twice a month)	Restaurant	Vaguely familiar	Very concerned	Not at all concerned	Extremely concerned	Extremely concerned	Moderately concerned	Somewhat unlikely	Yes	1997	United States of America	North Carolina
2019-10-10 13:53:00	2019-10-10 13:54:00	100	91	TRUE	2019-10-10 13:54:00	EN	Sometimes (once or twice a month)	Grocery store	Vaguely familiar	Very concerned	Slightly concerned	Very concerned	Extremely concerned	Extremely concerned	Extremely likely	No	1991	United States of America	Illinois
2019-10-10 13:53:00	2019-10-10 13:56:00	100	146	TRUE	2019-10-10 13:56:00	EN	Never	I do not purchase seafood	Vaguely familiar	Very concerned	Very concerned	Very concerned	Very concerned	Very concerned	Extremely unlikely	No	1998	United States of America	North Carolina
2019-10-10 13:53:00	2019-10-10 13:56:00	100	162	TRUE	2019-10-10 13:56:00	EN	Seldom (once or twice a year)	Grocery store,Restaurant	Vaguely familiar	Very concerned	Moderately concerned	Moderately concerned	Very concerned	Very concerned	Somewhat likely	Yes	2000	United States of America	North Carolina
2019-10-10 13:57:00	2019-10-10 13:59:00	100	115	TRUE	2019-10-10 13:59:00	EN	Never	I do not purchase seafood	Vaguely familiar	Very concerned	Extremely concerned	Very concerned	Very concerned	Very concerned	Extremely likely	Yes	2000	United States of America	Rhode Island
2019-10-10 13:58:00	2019-10-10 14:00:00	100	125	TRUE	2019-10-10 14:00:00	EN	Sometimes (once or twice a month)	Seafood market,Grocery store,Restaurant	Vaguely familiar	Very concerned	Very concerned	Very concerned	Very concerned	Extremely concerned	Somewhat likely	Yes	1995	United States of America	North Carolina
2019-10-10 14:00:00	2019-10-10 14:02:00	100	119	TRUE	2019-10-10 14:02:00	EN	Sometimes (once or twice a month)	Restaurant	Never heard of it	Very concerned	Extremely concerned	Very concerned	Extremely concerned	Extremely concerned	Somewhat likely	Yes	1998	United States of America	North Carolina
2019-10-10 14:03:00	2019-10-10 14:05:00	100	85	TRUE	2019-10-10 14:05:00	EN	Never	I do not purchase seafood	Never heard of it	Very concerned	Extremely concerned	Slightly concerned	Extremely concerned	Moderately concerned	Neither likely nor unlikely	Yes	2001	United States of America	North Carolina
2019-10-10 14:04:00	2019-10-10 14:06:00	100	128	TRUE	2019-10-10 14:06:00	EN	Often (once a week)	Grocery store,Other	Vaguely familiar	Very concerned	Extremely concerned	Very concerned	Extremely concerned	Very concerned	Extremely likely	No	1960	United States of America	Connecticut
2019-10-10 14:22:00	2019-10-10 14:24:00	100	89	TRUE	2019-10-10 14:24:00	EN	Sometimes (once or twice a month)	Restaurant	Never heard of it	Very concerned	Slightly concerned	Moderately concerned	Very concerned	Very concerned	Extremely likely	Yes	1997	United States of America	North Carolina
2019-10-10 14:17:00	2019-10-10 14:24:00	100	446	TRUE	2019-10-10 14:24:00	EN	Very often (several times per week)	Seafood market,Restaurant	Very familiar	Very concerned	Very concerned	Moderately concerned	Extremely concerned	Moderately concerned	Somewhat likely	Yes	30 years	C√¥te d'Ivoire	North Carolina
2019-10-10 14:41:00	2019-10-10 14:42:00	100	103	TRUE	2019-10-10 14:42:00	EN	Often (once a week)	Seafood market,Grocery store,Restaurant,Other	Very familiar	Very concerned	Extremely concerned	Extremely concerned	Extremely concerned	Extremely concerned	Extremely likely	Yes	1993	United States of America	Pennsylvania
2019-10-10 14:44:00	2019-10-10 14:46:00	100	118	TRUE	2019-10-10 14:46:00	EN	Seldom (once or twice a year)	I do not purchase seafood	Never heard of it	Very concerned	Extremely concerned	Moderately concerned	Extremely concerned	Extremely concerned	Extremely likely	Yes	2000	United States of America	North Carolina
2019-10-10 14:48:00	2019-10-10 14:50:00	100	133	TRUE	2019-10-10 14:50:00	EN	Sometimes (once or twice a month)	Grocery store,Restaurant	Never heard of it	Very concerned	Extremely concerned	Extremely concerned	Extremely concerned	Extremely concerned	Extremely likely	No	1962	United States of America	Minnesota
2019-10-10 14:52:00	2019-10-10 14:55:00	100	167	TRUE	2019-10-10 14:55:00	EN	Often (once a week)	Seafood market,Restaurant	Very familiar	Very concerned	Extremely concerned	Extremely concerned	Extremely concerned	Extremely concerned	Extremely likely	No	1953	United States of America	South Carolina
2019-10-10 14:59:00	2019-10-10 15:02:00	100	169	TRUE	2019-10-10 15:02:00	EN	Seldom (once or twice a year)	Grocery store	Never heard of it	Very concerned	Moderately concerned	Very concerned	Extremely concerned	Slightly concerned	Neither likely nor unlikely	Yes	1998	United States of America	North Carolina
2019-10-10 15:02:00	2019-10-10 15:05:00	100	199	TRUE	2019-10-10 15:05:00	EN	Sometimes (once or twice a month)	Grocery store,Restaurant	Vaguely familiar	Very concerned	Extremely concerned	Moderately concerned	Moderately concerned	Extremely concerned	Somewhat likely	Yes	1996	United States of America	North Carolina
2019-10-10 15:08:00	2019-10-10 15:10:00	100	91	TRUE	2019-10-10 15:10:00	EN	Never	Restaurant	Vaguely familiar	Very concerned	Very concerned	Very concerned	Extremely concerned	Slightly concerned	Somewhat likely	Yes	1999	United States of America	North Carolina
2019-10-10 15:17:00	2019-10-10 15:19:00	100	159	TRUE	2019-10-10 15:19:00	EN	Sometimes (once or twice a month)	Restaurant	Vaguely familiar	Very concerned	Moderately concerned	Very concerned	Very concerned	Moderately concerned	Extremely likely	No	1968	United States of America	Georgia
2019-10-10 15:27:00	2019-10-10 15:29:00	100	121	TRUE	2019-10-10 15:29:00	EN	Sometimes (once or twice a month)	Seafood market,Restaurant	Very familiar	Very concerned	Extremely concerned	Moderately concerned	Extremely concerned	Slightly concerned	Extremely likely	Yes	1998	United States of America	North Carolina
2019-10-10 15:28:00	2019-10-10 15:30:00	100	106	TRUE	2019-10-10 15:30:00	EN	Often (once a week)	Grocery store,Restaurant	Never heard of it	Very concerned	Extremely concerned	Extremely concerned	Extremely concerned	Moderately concerned	Somewhat likely	Yes	1998	United States of America	North Carolina
2019-10-10 15:42:00	2019-10-10 15:45:00	100	186	TRUE	2019-10-10 15:45:00	EN	Sometimes (once or twice a month)	Seafood market,Grocery store,Restaurant	Very familiar	Very concerned	Very concerned	Slightly concerned	Very concerned	Very concerned	Somewhat likely	No	1943	United States of America	Minnesota
2019-10-10 15:57:00	2019-10-10 15:59:00	100	113	TRUE	2019-10-10 15:59:00	EN	Often (once a week)	Seafood market,Grocery store,Restaurant	Vaguely familiar	Very concerned	Very concerned	Extremely concerned	Extremely concerned	Moderately concerned	Somewhat likely	Yes	1996	United States of America	North Carolina
2019-10-10 16:00:00	2019-10-10 16:03:00	100	158	TRUE	2019-10-10 16:03:00	EN	Very often (several times per week)	Seafood market,Grocery store,Restaurant,Other	Vaguely familiar	Very concerned	Very concerned	Very concerned	Extremely concerned	Very concerned	Extremely likely	No	1965	United States of America	Alaska
2019-10-10 16:17:00	2019-10-10 16:19:00	100	102	TRUE	2019-10-10 16:19:00	EN	Sometimes (once or twice a month)	Restaurant	Never heard of it	Very concerned	Very concerned	Extremely concerned	Extremely concerned	Extremely concerned	Neither likely nor unlikely	Yes	2000	United States of America	North Carolina
2019-10-10 16:23:00	2019-10-10 16:25:00	100	116	TRUE	2019-10-10 16:25:00	EN	Never	I do not purchase seafood	Never heard of it	Very concerned	Extremely concerned	Moderately concerned	Extremely concerned	Moderately concerned	Neither likely nor unlikely	Yes	2000	United States of America	North Carolina
2019-10-10 16:25:00	2019-10-10 16:30:00	100	284	TRUE	2019-10-10 16:30:00	EN	Very often (several times per week)	Grocery store,Restaurant	Vaguely familiar	Very concerned	Extremely concerned	Extremely concerned	Very concerned	Extremely concerned	Extremely likely	No	1941	United States of America	Massachusetts
2019-10-10 16:28:00	2019-10-10 16:30:00	100	152	TRUE	2019-10-10 16:30:00	EN	Sometimes (once or twice a month)	Grocery store,Restaurant	Vaguely familiar	Very concerned	Very concerned	Moderately concerned	Very concerned	Extremely concerned	Somewhat likely	Yes	1999	United States of America	North Carolina
2019-10-10 16:28:00	2019-10-10 16:33:00	100	275	TRUE	2019-10-10 16:33:00	EN	Often (once a week)	Grocery store	Never heard of it	Very concerned	Extremely concerned	Extremely concerned	Extremely concerned	Very concerned	Extremely likely	No	1961	United States of America	South Carolina
2019-10-10 16:38:00	2019-10-10 16:39:00	100	109	TRUE	2019-10-10 16:39:00	EN	Very often (several times per week)	Grocery store	Very familiar	Very concerned	Extremely concerned	Slightly concerned	Very concerned	Very concerned	Extremely likely	No	1960	United States of America	North Carolina
2019-10-10 16:39:00	2019-10-10 16:42:00	100	192	TRUE	2019-10-10 16:42:00	EN	Sometimes (once or twice a month)	Seafood market,Grocery store,Restaurant,Other	Vaguely familiar	Very concerned	Extremely concerned	Not at all concerned	Slightly concerned	Extremely concerned	Extremely likely	Yes	2000	United States of America	North Carolina
2019-10-10 16:44:00	2019-10-10 16:47:00	100	163	TRUE	2019-10-10 16:47:00	EN	Seldom (once or twice a year)	Restaurant	Vaguely familiar	Very concerned	Extremely concerned	Extremely concerned	Extremely concerned	Extremely concerned	Extremely likely	No	1957	United States of America	North Carolina
2019-10-10 16:46:00	2019-10-10 16:50:00	100	185	TRUE	2019-10-10 16:50:00	EN	Sometimes (once or twice a month)	Grocery store,Restaurant	Very familiar	Very concerned	Very concerned	Extremely concerned	Extremely concerned	Very concerned	Extremely likely	Yes	1992	United States of America	North Carolina
2019-10-10 16:49:00	2019-10-10 16:51:00	100	154	TRUE	2019-10-10 16:51:00	EN	Sometimes (once or twice a month)	Restaurant	Vaguely familiar	Very concerned	Extremely concerned	Extremely concerned	Extremely concerned	Extremely concerned	Extremely likely	No	1943	United States of America	Florida
2019-10-10 12:49:00	2019-10-10 16:59:00	100	14978	TRUE	2019-10-10 16:59:00	EN	Sometimes (once or twice a month)	Restaurant	Vaguely familiar	Very concerned	Very concerned	Extremely concerned	Extremely concerned	Very concerned	Somewhat likely	Yes	2000	United States of America	North Carolina
2019-10-10 17:21:00	2019-10-10 17:23:00	100	123	TRUE	2019-10-10 17:23:00	EN	Seldom (once or twice a year)	Restaurant	Vaguely familiar	Very concerned	Very concerned	Very concerned	Extremely concerned	Slightly concerned	Extremely likely	No	1974	United States of America	North Carolina
2019-10-10 17:24:00	2019-10-10 17:28:00	100	216	TRUE	2019-10-10 17:28:00	EN	Seldom (once or twice a year)	Restaurant	Vaguely familiar	Very concerned	Moderately concerned	Very concerned	Very concerned	Very concerned	Extremely likely	No	1954	United States of America	Minnesota
2019-10-10 17:28:00	2019-10-10 17:30:00	100	113	TRUE	2019-10-10 17:30:00	EN	Sometimes (once or twice a month)	Grocery store,Restaurant	Never heard of it	Very concerned	Extremely concerned	Moderately concerned	Extremely concerned	Extremely concerned	Neither likely nor unlikely	Yes	1997	United States of America	North Carolina
2019-10-10 17:52:00	2019-10-10 17:54:00	100	116	TRUE	2019-10-10 17:54:00	EN	Sometimes (once or twice a month)	Restaurant	Never heard of it	Very concerned	Moderately concerned	Slightly concerned	Very concerned	Very concerned	Somewhat likely	Yes	1998	United States of America	North Carolina
2019-10-10 18:01:00	2019-10-10 18:03:00	100	140	TRUE	2019-10-10 18:03:00	EN	Never	I do not purchase seafood	Vaguely familiar	Very concerned	Very concerned	Very concerned	Very concerned	Very concerned	Somewhat unlikely	Yes	2000	United States of America	North Carolina
2019-10-10 17:54:00	2019-10-10 18:05:00	100	639	TRUE	2019-10-10 18:05:00	EN	Often (once a week)	I do not purchase seafood	Never heard of it	Very concerned	Extremely concerned	Extremely concerned	Extremely concerned	Moderately concerned	Extremely likely	Yes	1998	United States of America	North Carolina
2019-10-10 18:07:00	2019-10-10 18:10:00	100	153	TRUE	2019-10-10 18:10:00	EN	Very often (several times per week)	Seafood market,Grocery store,Restaurant	Vaguely familiar	Very concerned	Extremely concerned	Extremely concerned	Extremely concerned	Extremely concerned	Extremely likely	No	1970	United States of America	North Carolina
2019-10-10 18:11:00	2019-10-10 18:18:00	100	377	TRUE	2019-10-10 18:18:00	EN	Sometimes (once or twice a month)	Restaurant	Very familiar	Very concerned	Slightly concerned	Extremely concerned	Extremely concerned	Extremely concerned	Somewhat likely	Yes	1995	United States of America	North Carolina
2019-10-10 18:18:00	2019-10-10 18:21:00	100	202	TRUE	2019-10-10 18:21:00	EN	Sometimes (once or twice a month)	Restaurant	Vaguely familiar	Very concerned	Slightly concerned	Not at all concerned	Extremely concerned	Moderately concerned	Somewhat likely	Yes	1993	United States of America	North Carolina
2019-10-10 18:32:00	2019-10-10 18:35:00	100	152	TRUE	2019-10-10 18:35:00	EN	Sometimes (once or twice a month)	Grocery store,Restaurant	Vaguely familiar	Very concerned	Very concerned	Very concerned	Very concerned	Moderately concerned	Somewhat unlikely	No	1996	United States of America	North Carolina
2019-10-10 18:47:00	2019-10-10 18:50:00	100	155	TRUE	2019-10-10 18:50:00	EN	Sometimes (once or twice a month)	Restaurant	Never heard of it	Very concerned	Moderately concerned	Moderately concerned	Moderately concerned	Moderately concerned	Neither likely nor unlikely	Yes	2000-12-29	United States of America	North Carolina
2019-10-10 18:53:00	2019-10-10 19:01:00	100	472	TRUE	2019-10-10 19:01:00	EN	Seldom (once or twice a year)	Grocery store	Never heard of it	Very concerned	Very concerned	Slightly concerned	Slightly concerned	Very concerned	Somewhat likely	No	1981	United States of America	North Carolina
2019-10-10 19:03:00	2019-10-10 19:06:00	100	171	TRUE	2019-10-10 19:06:00	EN	Often (once a week)	Seafood market,Grocery store,Restaurant,Other	Vaguely familiar	Very concerned	Moderately concerned	Very concerned	Very concerned	Extremely concerned	Extremely likely	Yes	1986	United States of America	Hawaii
2019-10-10 19:10:00	2019-10-10 19:12:00	100	146	TRUE	2019-10-10 19:12:00	EN	Sometimes (once or twice a month)	Grocery store	Never heard of it	Very concerned	Moderately concerned	Very concerned	Very concerned	Moderately concerned	Extremely likely	No	1977	United States of America	North Carolina
2019-10-10 19:25:00	2019-10-10 19:27:00	100	150	TRUE	2019-10-10 19:27:00	EN	Sometimes (once or twice a month)	Grocery store,Restaurant	Vaguely familiar	Very concerned	Very concerned	Very concerned	Extremely concerned	Moderately concerned	Extremely likely	No	1971	United States of America	Virginia
2019-10-10 20:14:00	2019-10-10 20:15:00	100	80	TRUE	2019-10-10 20:15:00	EN	Seldom (once or twice a year)	Restaurant	Never heard of it	Very concerned	Extremely concerned	Not at all concerned	Very concerned	Very concerned	Extremely likely	No	1992	United States of America	North Carolina
2019-10-10 20:22:00	2019-10-10 20:24:00	100	108	TRUE	2019-10-10 20:24:00	EN	Sometimes (once or twice a month)	Restaurant	Never heard of it	Very concerned	Extremely concerned	Extremely concerned	Very concerned	Extremely concerned	Extremely likely	Yes	1995	United States of America	North Carolina
2019-10-10 20:27:00	2019-10-10 20:30:00	100	234	TRUE	2019-10-10 20:30:00	EN	Sometimes (once or twice a month)	Restaurant	Vaguely familiar	Very concerned	Extremely concerned	Very concerned	Extremely concerned	Extremely concerned	Extremely likely	No	1963	United States of America	North Carolina
2019-10-10 20:40:00	2019-10-10 20:43:00	100	133	TRUE	2019-10-10 20:43:00	EN	Often (once a week)	Seafood market	Vaguely familiar	Very concerned	Extremely concerned	Extremely concerned	Extremely concerned	Extremely concerned	Extremely likely	No	1972	United States of America	Connecticut
2019-10-10 20:41:00	2019-10-10 20:44:00	100	199	TRUE	2019-10-10 20:44:00	EN	Often (once a week)	Restaurant	Never heard of it	Very concerned	Not at all concerned	Moderately concerned	Extremely concerned	Extremely concerned	Extremely likely	No	1978	United States of America	North Carolina
2019-10-10 20:44:00	2019-10-10 20:47:00	100	140	TRUE	2019-10-10 20:47:00	EN	Very often (several times per week)	Grocery store	Vaguely familiar	Very concerned	Moderately concerned	Very concerned	Very concerned	Very concerned	Somewhat likely	No	1985	United States of America	North Carolina
2019-10-10 20:49:00	2019-10-10 20:52:00	100	164	TRUE	2019-10-10 20:52:00	EN	Sometimes (once or twice a month)	Restaurant	Vaguely familiar	Very concerned	Very concerned	Very concerned	Very concerned	Extremely concerned	Extremely likely	No	1962	United States of America	Minnesota
2019-10-10 20:54:00	2019-10-10 20:56:00	100	136	TRUE	2019-10-10 20:56:00	EN	Never	I do not purchase seafood	Never heard of it	Very concerned	Extremely concerned	Moderately concerned	Extremely concerned	Extremely concerned	Extremely likely	No	1969	United States of America	Pennsylvania
2019-10-10 20:58:00	2019-10-10 21:01:00	100	183	TRUE	2019-10-10 21:01:00	EN	Very often (several times per week)	Grocery store	Very familiar	Very concerned	Very concerned	Very concerned	Extremely concerned	Extremely concerned	Extremely likely	No	1959	United States of America	Connecticut
2019-10-10 21:01:00	2019-10-10 21:03:00	100	84	TRUE	2019-10-10 21:03:00	EN	Sometimes (once or twice a month)	Restaurant	Vaguely familiar	Very concerned	Very concerned	Very concerned	Very concerned	Very concerned	Extremely likely	Yes	2000	United States of America	North Carolina
2019-10-10 21:08:00	2019-10-10 21:11:00	100	200	TRUE	2019-10-10 21:11:00	EN	Sometimes (once or twice a month)	Grocery store	Vaguely familiar	Very concerned	Extremely concerned	Very concerned	Very concerned	Moderately concerned	Somewhat unlikely	No	1975	United States of America	North Carolina
2019-10-10 21:18:00	2019-10-10 21:20:00	100	129	TRUE	2019-10-10 21:20:00	EN	Sometimes (once or twice a month)	Seafood market,Grocery store	Vaguely familiar	Very concerned	Not at all concerned	Extremely concerned	Extremely concerned	Extremely concerned	Extremely likely	No	1957	United States of America	Minnesota
2019-10-10 21:35:00	2019-10-10 21:38:00	100	135	TRUE	2019-10-10 21:38:00	EN	Sometimes (once or twice a month)	Restaurant	Vaguely familiar	Very concerned	Extremely concerned	Not at all concerned	Very concerned	Extremely concerned	Extremely unlikely	No	1995	United States of America	North Carolina
2019-10-10 21:37:00	2019-10-10 21:39:00	100	128	TRUE	2019-10-10 21:39:00	EN	Sometimes (once or twice a month)	Restaurant	Vaguely familiar	Very concerned	Not at all concerned	Slightly concerned	Very concerned	Very concerned	Extremely unlikely	No	1964	United States of America	North Carolina
2019-10-10 21:42:00	2019-10-10 21:44:00	100	161	TRUE	2019-10-10 21:44:00	EN	Sometimes (once or twice a month)	Restaurant	Never heard of it	Very concerned	Extremely concerned	Extremely concerned	Extremely concerned	Extremely concerned	Somewhat unlikely	No	1956	United States of America	North Carolina
2019-10-10 21:45:00	2019-10-10 21:47:00	100	124	TRUE	2019-10-10 21:47:00	EN	Sometimes (once or twice a month)	Restaurant	Never heard of it	Very concerned	Very concerned	Extremely concerned	Extremely concerned	Extremely concerned	Extremely likely	No	1980	United States of America	North Carolina
2019-10-10 21:47:00	2019-10-10 21:50:00	100	177	TRUE	2019-10-10 21:50:00	EN	Sometimes (once or twice a month)	Seafood market	Never heard of it	Very concerned	Extremely concerned	Moderately concerned	Very concerned	Very concerned	Somewhat likely	No	1965	United States of America	North Carolina
2019-10-10 22:01:00	2019-10-10 22:03:00	100	127	TRUE	2019-10-10 22:03:00	EN	Often (once a week)	Seafood market,Grocery store,Restaurant	Vaguely familiar	Very concerned	Slightly concerned	Slightly concerned	Very concerned	Extremely concerned	Somewhat likely	Yes	1995	United States of America	North Carolina
2019-10-10 22:05:00	2019-10-10 22:08:00	100	180	TRUE	2019-10-10 22:08:00	EN	Sometimes (once or twice a month)	Grocery store,Restaurant	Never heard of it	Very concerned	Very concerned	Very concerned	Extremely concerned	Slightly concerned	Somewhat unlikely	Yes	1998	United States of America	North Carolina
2019-10-10 22:06:00	2019-10-10 22:11:00	100	288	TRUE	2019-10-10 22:11:00	EN	Sometimes (once or twice a month)	Seafood market	Vaguely familiar	Very concerned	Moderately concerned	Very concerned	Extremely concerned	Very concerned	Extremely likely	Yes	1995	United States of America	North Carolina
2019-10-10 22:18:00	2019-10-10 22:21:00	100	186	TRUE	2019-10-10 22:21:00	EN	Sometimes (once or twice a month)	Grocery store,Restaurant	Never heard of it	Very concerned	Moderately concerned	Moderately concerned	Moderately concerned	Moderately concerned	Somewhat likely	No	1968	United States of America	North Carolina
2019-10-10 22:22:00	2019-10-10 22:23:00	100	92	TRUE	2019-10-10 22:23:00	EN	Sometimes (once or twice a month)	Restaurant	Never heard of it	Very concerned	Very concerned	Very concerned	Extremely concerned	Moderately concerned	Extremely likely	Yes	1995	United States of America	North Carolina
2019-10-10 22:23:00	2019-10-10 22:26:00	100	166	TRUE	2019-10-10 22:26:00	EN	Often (once a week)	Grocery store,Restaurant	Never heard of it	Very concerned	Very concerned	Moderately concerned	Very concerned	Extremely concerned	Somewhat likely	No	1951	United States of America	Georgia
2019-10-10 22:22:00	2019-10-10 22:38:00	100	975	TRUE	2019-10-10 22:38:00	EN	Sometimes (once or twice a month)	Grocery store	Never heard of it	Very concerned	Very concerned	Not at all concerned	Extremely concerned	Very concerned	Somewhat likely	No	1969	United States of America	North Carolina
2019-10-10 22:46:00	2019-10-10 22:50:00	100	253	TRUE	2019-10-10 22:50:00	EN	Sometimes (once or twice a month)	Grocery store	Vaguely familiar	Very concerned	Extremely concerned	Extremely concerned	Extremely concerned	Extremely concerned	Extremely likely	No	1950	United States of America	Minnesota
2019-10-10 22:51:00	2019-10-10 22:56:00	100	313	TRUE	2019-10-10 22:56:00	EN	Often (once a week)	Grocery store,Restaurant	Very familiar	Very concerned	Moderately concerned	Extremely concerned	Extremely concerned	Extremely concerned	Somewhat likely	No	1943	United States of America	North Carolina
2019-10-10 23:00:00	2019-10-10 23:02:00	100	112	TRUE	2019-10-10 23:02:00	EN	Sometimes (once or twice a month)	Seafood market	Very familiar	Very concerned	Slightly concerned	Very concerned	Extremely concerned	Slightly concerned	Somewhat likely	No	1981	United States of America	California
2019-10-10 23:12:00	2019-10-10 23:14:00	100	130	TRUE	2019-10-10 23:14:00	EN	Sometimes (once or twice a month)	Grocery store	Never heard of it	Very concerned	Very concerned	Moderately concerned	Moderately concerned	Very concerned	Extremely likely	No	1962	United States of America	Minnesota
2019-10-11 00:16:00	2019-10-11 00:18:00	100	154	TRUE	2019-10-11 00:18:00	EN	Very often (several times per week)	Grocery store	Vaguely familiar	Very concerned	Very concerned	Moderately concerned	Extremely concerned	Very concerned	Extremely likely	No	1995	United States of America	North Carolina
2019-10-11 00:20:00	2019-10-11 00:22:00	100	112	TRUE	2019-10-11 00:22:00	EN	Often (once a week)	Seafood market,Grocery store,Restaurant	Vaguely familiar	Very concerned	Extremely concerned	Very concerned	Very concerned	Very concerned	Extremely likely	No	1961	United States of America	Idaho
2019-10-11 01:24:00	2019-10-11 01:27:00	100	195	TRUE	2019-10-11 01:27:00	EN	Seldom (once or twice a year)	Other	Very familiar	Very concerned	Slightly concerned	Slightly concerned	Extremely concerned	Extremely concerned	Extremely likely	Yes	1993	United States of America	Texas
2019-10-11 01:30:00	2019-10-11 01:32:00	100	120	TRUE	2019-10-11 01:32:00	EN	Sometimes (once or twice a month)	Grocery store,Restaurant	Never heard of it	Very concerned	Extremely concerned	Moderately concerned	Extremely concerned	Extremely concerned	Somewhat likely	No	2001	United States of America	North Carolina
2019-10-11 01:43:00	2019-10-11 01:45:00	100	117	TRUE	2019-10-11 01:45:00	EN	Often (once a week)	Seafood market,Restaurant	Vaguely familiar	Very concerned	Very concerned	Very concerned	Very concerned	Slightly concerned	Extremely likely	No	1965	Australia
2019-10-11 05:09:00	2019-10-11 05:12:00	100	177	TRUE	2019-10-11 05:12:00	EN	Often (once a week)	Seafood market	Vaguely familiar	Very concerned	Very concerned	Extremely concerned	Very concerned	Very concerned	Somewhat likely	No	1962	United States of America	North Carolina
2019-10-11 06:16:00	2019-10-11 06:19:00	100	187	TRUE	2019-10-11 06:19:00	EN	Sometimes (once or twice a month)	Restaurant	Never heard of it	Very concerned	Extremely concerned	Extremely concerned	Extremely concerned	Extremely concerned	Somewhat likely	No	2001	United States of America	North Carolina
2019-10-11 06:34:00	2019-10-11 06:37:00	100	184	TRUE	2019-10-11 06:37:00	EN	Sometimes (once or twice a month)	Grocery store	Vaguely familiar	Very concerned	Very concerned	Very concerned	Extremely concerned	Extremely concerned	Extremely likely	No	1955	United States of America	Arizona
2019-10-11 06:37:00	2019-10-11 06:39:00	100	130	TRUE	2019-10-11 06:39:00	EN	Very often (several times per week)	Grocery store,Other	Very familiar	Very concerned	Very concerned	Extremely concerned	Extremely concerned	Extremely concerned	Extremely likely	No	1965	United States of America	Florida
2019-10-11 07:25:00	2019-10-11 07:28:00	100	177	TRUE	2019-10-11 07:28:00	EN	Sometimes (once or twice a month)	Restaurant	Vaguely familiar	Very concerned	Extremely concerned	Extremely concerned	Extremely concerned	Extremely concerned	Somewhat unlikely	No	1956	United States of America	North Carolina
2019-10-11 07:27:00	2019-10-11 07:31:00	100	219	TRUE	2019-10-11 07:31:00	EN	Very often (several times per week)	Seafood market	Vaguely familiar	Very concerned	Slightly concerned	Slightly concerned	Very concerned	Extremely concerned	Extremely likely	No	1964	United States of America	South Carolina
2019-10-11 08:20:00	2019-10-11 08:23:00	100	208	TRUE	2019-10-11 08:23:00	EN	Often (once a week)	Seafood market	Never heard of it	Very concerned	Very concerned	Very concerned	Extremely concerned	Very concerned	Extremely likely	No	1944	United States of America	South Carolina
2019-10-11 08:58:00	2019-10-11 09:01:00	100	140	TRUE	2019-10-11 09:01:00	EN	Sometimes (once or twice a month)	Seafood market	Never heard of it	Very concerned	Extremely concerned	Slightly concerned	Moderately concerned	Slightly concerned	Neither likely nor unlikely	Yes	2003	United States of America	North Carolina
2019-10-11 09:19:00	2019-10-11 09:22:00	100	150	TRUE	2019-10-11 09:22:00	EN	Often (once a week)	Grocery store,Restaurant,Other	Vaguely familiar	Very concerned	Moderately concerned	Very concerned	Extremely concerned	Moderately concerned	Extremely likely	Yes	1992	United States of America	North Carolina
2019-10-11 09:23:00	2019-10-11 09:25:00	100	95	TRUE	2019-10-11 09:25:00	EN	Never	I do not purchase seafood	Very familiar	Very concerned	Not at all concerned	Very concerned	Extremely concerned	Slightly concerned	Extremely likely	Yes	1992	United States of America	New York
2019-10-11 09:29:00	2019-10-11 09:31:00	100	130	TRUE	2019-10-11 09:31:00	EN	Often (once a week)	Seafood market,Grocery store,Restaurant	Very familiar	Very concerned	Slightly concerned	Extremely concerned	Extremely concerned	Very concerned	Neither likely nor unlikely	Yes	2000	United States of America	West Virginia
2019-10-11 09:31:00	2019-10-11 09:33:00	100	117	TRUE	2019-10-11 09:33:00	EN	Often (once a week)	Seafood market,Grocery store,Restaurant	Vaguely familiar	Very concerned	Very concerned	Slightly concerned	Extremely concerned	Not at all concerned	Extremely likely	No	1981	United States of America	New York
2019-10-11 09:30:00	2019-10-11 09:35:00	100	282	TRUE	2019-10-11 09:35:00	EN	Often (once a week)	Grocery store,Restaurant	Vaguely familiar	Very concerned	Extremely concerned	Very concerned	Very concerned	Very concerned	Somewhat likely	No	07 31 1932	United States of America
2019-10-11 09:37:00	2019-10-11 09:39:00	100	102	TRUE	2019-10-11 09:39:00	EN	Very often (several times per week)	Grocery store	Vaguely familiar	Very concerned	Moderately concerned	Extremely concerned	Extremely concerned	Slightly concerned	Extremely likely	No	1976	United States of America	North Carolina
2019-10-11 09:37:00	2019-10-11 09:39:00	100	122	TRUE	2019-10-11 09:39:00	EN	Often (once a week)	Grocery store	Vaguely familiar	Very concerned	Very concerned	Slightly concerned	Very concerned	Very concerned	Extremely likely	No	1981	United States of America	North Carolina
2019-10-11 09:38:00	2019-10-11 09:39:00	100	88	TRUE	2019-10-11 09:39:00	EN	Sometimes (once or twice a month)	Seafood market,Restaurant	Vaguely familiar	Very concerned	Moderately concerned	Slightly concerned	Very concerned	Extremely concerned	Somewhat likely	No	1987	United States of America	North Carolina
2019-10-11 09:39:00	2019-10-11 09:40:00	100	102	TRUE	2019-10-11 09:40:00	EN	Often (once a week)	Grocery store,Restaurant	Very familiar	Very concerned	Extremely concerned	Extremely concerned	Extremely concerned	Very concerned	Extremely likely	No	1949	United States of America	North Carolina
2019-10-11 09:43:00	2019-10-11 09:46:00	100	162	TRUE	2019-10-11 09:46:00	EN	Sometimes (once or twice a month)	Restaurant	Vaguely familiar	Very concerned	Extremely concerned	Extremely concerned	Extremely concerned	Moderately concerned	Extremely likely	No	1946	United States of America	North Carolina
2019-10-11 09:54:00	2019-10-11 09:56:00	100	113	TRUE	2019-10-11 09:56:00	EN	Often (once a week)	Other	Vaguely familiar	Very concerned	Very concerned	Very concerned	Very concerned	Slightly concerned	Neither likely nor unlikely	No	1955	United States of America	North Carolina
2019-10-11 09:56:00	2019-10-11 10:00:00	100	229	TRUE	2019-10-11 10:00:00	EN	Often (once a week)	Grocery store,Restaurant,Other	Never heard of it	Very concerned	Very concerned	Extremely concerned	Very concerned	Very concerned	Extremely likely	No	1958	United States of America	North Carolina
2019-10-11 10:04:00	2019-10-11 10:07:00	100	152	TRUE	2019-10-11 10:07:00	EN	Often (once a week)	Seafood market,Grocery store	Very familiar	Very concerned	Very concerned	Extremely concerned	Extremely concerned	Very concerned	Somewhat likely	No	1950	United States of America	Maine
2019-10-11 10:09:00	2019-10-11 10:11:00	100	144	TRUE	2019-10-11 10:11:00	EN	Often (once a week)	Grocery store,Restaurant	Vaguely familiar	Very concerned	Very concerned	Very concerned	Very concerned	Very concerned	Extremely likely	No	1950	United States of America	North Carolina
2019-10-11 10:14:00	2019-10-11 10:15:00	100	80	TRUE	2019-10-11 10:15:00	EN	Sometimes (once or twice a month)	Grocery store,Restaurant	Vaguely familiar	Very concerned	Very concerned	Very concerned	Extremely concerned	Very concerned	Somewhat likely	No	1974	United States of America	North Carolina
2019-10-11 10:16:00	2019-10-11 10:20:00	100	208	TRUE	2019-10-11 10:20:00	EN	Sometimes (once or twice a month)	Other	Vaguely familiar	Very concerned	Extremely concerned	Slightly concerned	Slightly concerned	Very concerned	Extremely likely	Yes	1998	United States of America	South Carolina
2019-10-11 10:19:00	2019-10-11 10:22:00	100	142	TRUE	2019-10-11 10:22:00	EN	Very often (several times per week)	Grocery store	Very familiar	Very concerned	Not at all concerned	Moderately concerned	Extremely concerned	Very concerned	Extremely likely	No	1944	United States of America	North Carolina
2019-10-11 10:23:00	2019-10-11 10:26:00	100	198	TRUE	2019-10-11 10:26:00	EN	Sometimes (once or twice a month)	Grocery store,Other	Never heard of it	Very concerned	Extremely concerned	Moderately concerned	Extremely concerned	Extremely concerned	Extremely likely	No	1948	United States of America	North Carolina
2019-10-11 10:25:00	2019-10-11 10:28:00	100	210	TRUE	2019-10-11 10:28:00	EN	Often (once a week)	Grocery store	Vaguely familiar	Very concerned	Very concerned	Extremely concerned	Extremely concerned	Extremely concerned	Somewhat likely	No	1969	United States of America	Florida
2019-10-11 10:27:00	2019-10-11 10:30:00	100	163	TRUE	2019-10-11 10:30:00	EN	Very often (several times per week)	Grocery store	Very familiar	Very concerned	Very concerned	Slightly concerned	Extremely concerned	Moderately concerned	Neither likely nor unlikely	No	1961	United States of America	Alaska
2019-10-11 10:29:00	2019-10-11 10:31:00	100	124	TRUE	2019-10-11 10:31:00	EN	Often (once a week)	Grocery store	Never heard of it	Very concerned	Very concerned	Extremely concerned	Extremely concerned	Moderately concerned	Extremely likely	Yes	1987	United States of America	Florida
2019-10-11 10:31:00	2019-10-11 10:34:00	100	132	TRUE	2019-10-11 10:34:00	EN	Often (once a week)	Grocery store,Restaurant,Other	Vaguely familiar	Very concerned	Very concerned	Very concerned	Very concerned	Moderately concerned	Somewhat likely	No	1972	United States of America	North Carolina
2019-10-11 10:37:00	2019-10-11 10:39:00	100	147	TRUE	2019-10-11 10:39:00	EN	Often (once a week)	Grocery store	Vaguely familiar	Very concerned	Moderately concerned	Extremely concerned	Very concerned	Extremely concerned	Neither likely nor unlikely	No	1989	United States of America	North Carolina
2019-10-11 10:54:00	2019-10-11 10:55:00	100	67	TRUE	2019-10-11 10:55:00	EN	Sometimes (once or twice a month)	Restaurant	Vaguely familiar	Very concerned	Extremely concerned	Extremely concerned	Extremely concerned	Very concerned	Extremely likely	No	1990	United States of America	North Carolina
2019-10-11 11:00:00	2019-10-11 11:03:00	100	190	TRUE	2019-10-11 11:03:00	EN	Often (once a week)	Grocery store,Restaurant	Vaguely familiar	Very concerned	Very concerned	Slightly concerned	Extremely concerned	Moderately concerned	Extremely likely	No	1957	United States of America	South Carolina
2019-10-11 11:11:00	2019-10-11 11:13:00	100	91	TRUE	2019-10-11 11:13:00	EN	Sometimes (once or twice a month)	Grocery store	Vaguely familiar	Very concerned	Slightly concerned	Very concerned	Extremely concerned	Moderately concerned	Somewhat likely	Yes	1992	United States of America	North Carolina
2019-10-11 11:15:00	2019-10-11 11:17:00	100	108	TRUE	2019-10-11 11:17:00	EN	Often (once a week)	I do not purchase seafood	Vaguely familiar	Very concerned	Slightly concerned	Moderately concerned	Slightly concerned	Very concerned	Somewhat likely	No	1976	United States of America	North Carolina
2019-10-11 11:28:00	2019-10-11 11:29:00	100	83	TRUE	2019-10-11 11:29:00	EN	Very often (several times per week)	Grocery store,Restaurant	Vaguely familiar	Very concerned	Slightly concerned	Extremely concerned	Extremely concerned	Moderately concerned	Extremely likely	No	1975	United States of America	North Carolina
2019-10-11 11:35:00	2019-10-11 11:36:00	100	73	TRUE	2019-10-11 11:36:00	EN	Sometimes (once or twice a month)	Grocery store,Restaurant	Very familiar	Very concerned	Very concerned	Extremely concerned	Extremely concerned	Extremely concerned	Extremely likely	Yes	1991	United States of America	North Carolina
2019-10-11 11:55:00	2019-10-11 11:57:00	100	94	TRUE	2019-10-11 11:57:00	EN	Often (once a week)	Restaurant	Vaguely familiar	Very concerned	Extremely concerned	Very concerned	Extremely concerned	Very concerned	Extremely likely	No	1988	United States of America	New Jersey
2019-10-11 12:07:00	2019-10-11 12:09:00	100	120	TRUE	2019-10-11 12:09:00	EN	Seldom (once or twice a year)	Restaurant	Vaguely familiar	Very concerned	Very concerned	Extremely concerned	Extremely concerned	Moderately concerned	Somewhat likely	No	1972	United States of America	New York
2019-10-11 12:08:00	2019-10-11 12:09:00	100	60	TRUE	2019-10-11 12:09:00	EN	Very often (several times per week)	Grocery store,Restaurant	Very familiar	Very concerned	Slightly concerned	Extremely concerned	Extremely concerned	Not at all concerned	Extremely likely	No	1980	United States of America	District of Columbia
2019-10-11 12:28:00	2019-10-11 12:33:00	100	345	TRUE	2019-10-11 12:33:00	EN	Often (once a week)	Grocery store,Restaurant	Vaguely familiar	Very concerned	Extremely concerned	Very concerned	Extremely concerned	Extremely concerned	Extremely likely	No	1943	United States of America	North Carolina
2019-10-11 12:42:00	2019-10-11 12:45:00	100	165	TRUE	2019-10-11 12:45:00	EN	Very often (several times per week)	Grocery store	Vaguely familiar	Very concerned	Slightly concerned	Very concerned	Very concerned	Slightly concerned	Somewhat likely	No	1943	United States of America	North Carolina
2019-10-11 12:45:00	2019-10-11 12:49:00	100	228	TRUE	2019-10-11 12:49:00	EN	Sometimes (once or twice a month)	Seafood market,Grocery store	Never heard of it	Very concerned	Extremely concerned	Extremely concerned	Extremely concerned	Extremely concerned	Extremely likely	No	1975	United States of America	North Carolina
2019-10-11 12:55:00	2019-10-11 12:57:00	100	97	TRUE	2019-10-11 12:57:00	EN	Sometimes (once or twice a month)	Restaurant	Never heard of it	Very concerned	Very concerned	Extremely concerned	Very concerned	Very concerned	Extremely likely	Yes	1994	United States of America	North Carolina
2019-10-11 12:53:00	2019-10-11 12:57:00	100	225	TRUE	2019-10-11 12:57:00	EN	Sometimes (once or twice a month)	Grocery store,Restaurant	Vaguely familiar	Very concerned	Very concerned	Very concerned	Very concerned	Very concerned	Somewhat likely	No	1945	United States of America	North Carolina
2019-10-11 12:56:00	2019-10-11 13:00:00	100	263	TRUE	2019-10-11 13:00:00	EN	Often (once a week)	Grocery store	Vaguely familiar	Very concerned	Extremely concerned	Extremely concerned	Extremely concerned	Very concerned	Extremely likely	No	1967	United States of America	North Carolina
2019-10-11 13:11:00	2019-10-11 13:14:00	100	205	TRUE	2019-10-11 13:14:00	EN	Often (once a week)	Seafood market	Vaguely familiar	Very concerned	Very concerned	Very concerned	Very concerned	Very concerned	Neither likely nor unlikely	No	1978	United States of America	North Carolina
2019-10-11 13:39:00	2019-10-11 13:41:00	100	94	TRUE	2019-10-11 13:41:00	EN	Sometimes (once or twice a month)	Grocery store	Never heard of it	Very concerned	Extremely concerned	Extremely concerned	Extremely concerned	Moderately concerned	Somewhat likely	Yes	1999	United States of America	North Carolina
2019-10-11 14:10:00	2019-10-11 14:12:00	100	131	TRUE	2019-10-11 14:12:00	EN	Seldom (once or twice a year)	Seafood market	Very familiar	Very concerned	Very concerned	Slightly concerned	Extremely concerned	Very concerned	Somewhat likely	No	1973	United States of America	North Carolina
2019-10-11 14:16:00	2019-10-11 14:22:00	100	325	TRUE	2019-10-11 14:22:00	EN	Sometimes (once or twice a month)	Seafood market,Restaurant	Vaguely familiar	Very concerned	Very concerned	Very concerned	Very concerned	Very concerned	Extremely likely	No	1967	Argentina
2019-10-11 14:19:00	2019-10-11 14:23:00	100	208	TRUE	2019-10-11 14:23:00	EN	Sometimes (once or twice a month)	Grocery store,Restaurant	Never heard of it	Very concerned	Moderately concerned	Very concerned	Very concerned	Extremely concerned	Extremely likely	No	1965	United States of America	North Carolina
2019-10-11 14:27:00	2019-10-11 14:30:00	100	206	TRUE	2019-10-11 14:30:00	EN	Sometimes (once or twice a month)	Grocery store	Vaguely familiar	Very concerned	Very concerned	Moderately concerned	Very concerned	Very concerned	Neither likely nor unlikely	Yes	1995	United States of America	North Carolina
2019-10-11 14:37:00	2019-10-11 14:40:00	100	146	TRUE	2019-10-11 14:40:00	EN	Very often (several times per week)	Seafood market,Restaurant	Very familiar	Very concerned	Moderately concerned	Moderately concerned	Extremely concerned	Extremely concerned	Extremely likely	No	1969	United States of America	Florida
2019-10-11 14:20:00	2019-10-11 14:42:00	100	1289	TRUE	2019-10-11 14:42:00	EN	Often (once a week)	Grocery store	Very familiar	Very concerned	Extremely concerned	Extremely concerned	Extremely concerned	Very concerned	Extremely likely	Yes	1980	United States of America	California
2019-10-11 14:39:00	2019-10-11 14:46:00	100	420	TRUE	2019-10-11 14:46:00	EN	Sometimes (once or twice a month)	Restaurant	Never heard of it	Very concerned	Moderately concerned	Slightly concerned	Moderately concerned	Very concerned	Neither likely nor unlikely	No	1950	United States of America	Florida
2019-10-11 14:56:00	2019-10-11 14:58:00	100	150	TRUE	2019-10-11 14:58:00	EN	Sometimes (once or twice a month)	Seafood market,Restaurant,I do not purchase seafood	Vaguely familiar	Very concerned	Very concerned	Very concerned	Extremely concerned	Moderately concerned	Extremely likely	No	1985	United States of America	North Carolina
2019-10-11 14:58:00	2019-10-11 15:01:00	100	153	TRUE	2019-10-11 15:01:00	EN	Very often (several times per week)	Seafood market	Very familiar	Very concerned	Very concerned	Extremely concerned	Extremely concerned	Extremely concerned	Extremely likely	No	1952	United States of America	North Carolina
2019-10-11 15:00:00	2019-10-11 15:02:00	100	156	TRUE	2019-10-11 15:02:00	EN	Often (once a week)	Seafood market,Restaurant	Never heard of it	Very concerned	Very concerned	Very concerned	Very concerned	Very concerned	Extremely likely	No	1947	United States of America	Rhode Island
2019-10-11 15:06:00	2019-10-11 15:08:00	100	121	TRUE	2019-10-11 15:08:00	EN	Seldom (once or twice a year)	Grocery store	Vaguely familiar	Very concerned	Extremely concerned	Moderately concerned	Extremely concerned	Extremely concerned	Extremely likely	No	1972	United States of America	California
2019-10-11 15:08:00	2019-10-11 15:10:00	100	122	TRUE	2019-10-11 15:11:00	EN	Sometimes (once or twice a month)	Grocery store	Never heard of it	Very concerned	Very concerned	Extremely concerned	Extremely concerned	Very concerned	Extremely likely	No	1944	United States of America	North Carolina
2019-10-11 15:09:00	2019-10-11 15:12:00	100	166	TRUE	2019-10-11 15:12:00	EN	Sometimes (once or twice a month)	Grocery store	Never heard of it	Very concerned	Very concerned	Extremely concerned	Extremely concerned	Very concerned	Somewhat likely	No	1967	United States of America	North Carolina
2019-10-11 15:21:00	2019-10-11 15:23:00	100	106	TRUE	2019-10-11 15:23:00	EN	Sometimes (once or twice a month)	Grocery store,Restaurant	Vaguely familiar	Very concerned	Very concerned	Very concerned	Very concerned	Moderately concerned	Somewhat likely	Yes	1995	United States of America	North Carolina
2019-10-11 15:32:00	2019-10-11 15:35:00	100	185	TRUE	2019-10-11 15:35:00	EN	Sometimes (once or twice a month)	Grocery store,Restaurant	Vaguely familiar	Very concerned	Extremely concerned	Moderately concerned	Moderately concerned	Extremely concerned	Somewhat likely	No	1986	United States of America	Minnesota
2019-10-11 15:37:00	2019-10-11 15:43:00	100	371	TRUE	2019-10-11 15:43:00	EN	Sometimes (once or twice a month)	Grocery store,Restaurant	Vaguely familiar	Very concerned	Very concerned	Moderately concerned	Moderately concerned	Moderately concerned	Somewhat unlikely	No	1954	United States of America	North Carolina
2019-10-11 15:48:00	2019-10-11 15:50:00	100	117	TRUE	2019-10-11 15:50:00	EN	Sometimes (once or twice a month)	Grocery store	Vaguely familiar	Very concerned	Very concerned	Extremely concerned	Extremely concerned	Moderately concerned	Somewhat likely	No	1964	United States of America	Virginia
2019-10-11 15:48:00	2019-10-11 15:50:00	100	118	TRUE	2019-10-11 15:50:00	EN	Very often (several times per week)	Seafood market	Vaguely familiar	Very concerned	Very concerned	Not at all concerned	Moderately concerned	Very concerned	Extremely likely	No	1953	United States of America	North Carolina
2019-10-11 15:57:00	2019-10-11 15:58:00	100	86	TRUE	2019-10-11 15:58:00	EN	Sometimes (once or twice a month)	Grocery store,Restaurant	Vaguely familiar	Very concerned	Very concerned	Very concerned	Very concerned	Slightly concerned	Somewhat likely	No	1992	United States of America	Wisconsin
2019-10-11 16:01:00	2019-10-11 16:02:00	100	75	TRUE	2019-10-11 16:02:00	EN	Often (once a week)	Grocery store,Restaurant	Very familiar	Very concerned	Very concerned	Very concerned	Very concerned	Moderately concerned	Somewhat likely	No	1994	United States of America	New Jersey
2019-10-11 16:01:00	2019-10-11 16:04:00	100	231	TRUE	2019-10-11 16:04:00	EN	Sometimes (once or twice a month)	Restaurant	Vaguely familiar	Very concerned	Extremely concerned	Very concerned	Extremely concerned	Extremely concerned	Extremely likely	No	1974	United States of America	North Carolina
2019-10-11 16:17:00	2019-10-11 16:19:00	100	119	TRUE	2019-10-11 16:19:00	EN	Often (once a week)	Grocery store,Restaurant	Vaguely familiar	Very concerned	Extremely concerned	Extremely concerned	Extremely concerned	Very concerned	Extremely likely	No	1988	United States of America	California
2019-10-11 16:24:00	2019-10-11 16:26:00	100	146	TRUE	2019-10-11 16:26:00	EN	Often (once a week)	Restaurant	Very familiar	Very concerned	Extremely concerned	Moderately concerned	Very concerned	Very concerned	Extremely likely	No	1967	United States of America	Massachusetts
2019-10-11 16:25:00	2019-10-11 16:30:00	100	267	TRUE	2019-10-11 16:30:00	EN	Often (once a week)	Seafood market	Vaguely familiar	Very concerned	Very concerned	Very concerned	Very concerned	Moderately concerned	Somewhat likely	No	1965	United States of America	Florida
2019-10-11 16:28:00	2019-10-11 16:30:00	100	140	TRUE	2019-10-11 16:30:00	EN	Often (once a week)	Grocery store	Vaguely familiar	Very concerned	Moderately concerned	Extremely concerned	Extremely concerned	Very concerned	Extremely likely	No	1966	United States of America	Virginia
2019-10-11 16:59:00	2019-10-11 17:01:00	100	93	TRUE	2019-10-11 17:01:00	EN	Sometimes (once or twice a month)	Restaurant	Very familiar	Very concerned	Moderately concerned	Very concerned	Extremely concerned	Moderately concerned	Extremely likely	Yes	1994	United States of America	North Carolina
2019-10-11 17:16:00	2019-10-11 17:18:00	100	123	TRUE	2019-10-11 17:18:00	EN	Seldom (once or twice a year)	Restaurant	Never heard of it	Very concerned	Very concerned	Extremely concerned	Extremely concerned	Moderately concerned	Extremely likely	No	1958	United States of America	Florida
2019-10-11 17:21:00	2019-10-11 17:23:00	100	133	TRUE	2019-10-11 17:23:00	EN	Often (once a week)	I do not purchase seafood	Never heard of it	Very concerned	Extremely concerned	Extremely concerned	Extremely concerned	Extremely concerned	Extremely likely	Yes	2001	United States of America	North Carolina
2019-10-11 17:37:00	2019-10-11 17:39:00	100	104	TRUE	2019-10-11 17:39:00	EN	Often (once a week)	Grocery store	Vaguely familiar	Very concerned	Slightly concerned	Not at all concerned	Slightly concerned	Extremely concerned	Neither likely nor unlikely	No	1966	United States of America	Massachusetts
2019-10-11 17:49:00	2019-10-11 17:51:00	100	88	TRUE	2019-10-11 17:51:00	EN	Sometimes (once or twice a month)	Grocery store	Vaguely familiar	Very concerned	Moderately concerned	Extremely concerned	Extremely concerned	Moderately concerned	Somewhat likely	No	1984	United States of America	New Jersey
2019-10-11 18:10:00	2019-10-11 18:12:00	100	167	TRUE	2019-10-11 18:12:00	EN	Very often (several times per week)	Grocery store,Restaurant	Never heard of it	Very concerned	Slightly concerned	Extremely concerned	Extremely concerned	Extremely concerned	Extremely likely	No	1942	United States of America	North Carolina
2019-10-11 18:36:00	2019-10-11 18:38:00	100	102	TRUE	2019-10-11 18:38:00	EN	Often (once a week)	Grocery store	Vaguely familiar	Very concerned	Slightly concerned	Extremely concerned	Extremely concerned	Slightly concerned	Somewhat likely	No	1976	United States of America	Maine
2019-10-11 18:47:00	2019-10-11 18:50:00	100	146	TRUE	2019-10-11 18:50:00	EN	Often (once a week)	Grocery store	Vaguely familiar	Very concerned	Extremely concerned	Moderately concerned	Extremely concerned	Slightly concerned	Extremely likely	No	1943	United States of America	Pennsylvania
2019-10-11 19:06:00	2019-10-11 19:09:00	100	172	TRUE	2019-10-11 19:09:00	EN	Very often (several times per week)	Grocery store	Very familiar	Very concerned	Very concerned	Extremely concerned	Extremely concerned	Very concerned	Extremely likely	No	1971	United States of America	Florida
2019-10-11 19:08:00	2019-10-11 19:10:00	100	119	TRUE	2019-10-11 19:10:00	EN	Often (once a week)	Seafood market,Grocery store,Restaurant	Never heard of it	Very concerned	Very concerned	Moderately concerned	Very concerned	Very concerned	Extremely likely	No	1961	United States of America	Massachusetts
2019-10-11 19:27:00	2019-10-11 19:30:00	100	130	TRUE	2019-10-11 19:30:00	EN	Sometimes (once or twice a month)	Grocery store	Very familiar	Very concerned	Very concerned	Extremely concerned	Extremely concerned	Very concerned	Extremely unlikely	Yes	1998	United States of America	North Carolina
2019-10-11 19:35:00	2019-10-11 19:37:00	100	132	TRUE	2019-10-11 19:38:00	EN	Often (once a week)	Grocery store,Restaurant	Vaguely familiar	Very concerned	Extremely concerned	Extremely concerned	Extremely concerned	Extremely concerned	Somewhat likely	No	1961	United States of America	North Carolina
2019-10-11 21:11:00	2019-10-11 21:14:00	100	175	TRUE	2019-10-11 21:14:00	EN	Very often (several times per week)	Grocery store	Vaguely familiar	Very concerned	Extremely concerned	Very concerned	Very concerned	Very concerned	Extremely likely	No	1964	United States of America	North Carolina
2019-10-11 21:46:00	2019-10-11 21:48:00	100	103	TRUE	2019-10-11 21:48:00	EN	Sometimes (once or twice a month)	Seafood market,Grocery store,Other	Vaguely familiar	Very concerned	Very concerned	Very concerned	Very concerned	Very concerned	Neither likely nor unlikely	No	1969	United States of America	North Carolina
2019-10-11 22:06:00	2019-10-11 22:12:00	100	340	TRUE	2019-10-11 22:12:00	EN	Sometimes (once or twice a month)	Restaurant	Vaguely familiar	Very concerned	Very concerned	Moderately concerned	Extremely concerned	Extremely concerned	Somewhat likely	No	1967	United States of America	Massachusetts
2019-10-11 22:23:00	2019-10-11 22:26:00	100	178	TRUE	2019-10-11 22:26:00	EN	Very often (several times per week)	Grocery store,Restaurant	Never heard of it	Very concerned	Very concerned	Very concerned	Very concerned	Very concerned	Somewhat likely	No	1943	United States of America	South Carolina
2019-10-11 22:46:00	2019-10-11 22:47:00	100	115	TRUE	2019-10-11 22:47:00	EN	Sometimes (once or twice a month)	Restaurant	Never heard of it	Very concerned	Extremely concerned	Extremely concerned	Extremely concerned	Extremely concerned	Somewhat likely	No	1964	United States of America	New York
2019-10-11 22:44:00	2019-10-11 22:48:00	100	248	TRUE	2019-10-11 22:48:00	EN	Sometimes (once or twice a month)	Grocery store,Restaurant	Vaguely familiar	Very concerned	Moderately concerned	Moderately concerned	Very concerned	Very concerned	Somewhat likely	No	1981-07-21	United States of America	Virginia
2019-10-11 22:55:00	2019-10-11 22:57:00	100	121	TRUE	2019-10-11 22:57:00	EN	Often (once a week)	Grocery store	Never heard of it	Very concerned	Very concerned	Extremely concerned	Extremely concerned	Extremely concerned	Extremely likely	No	1981	United States of America	North Carolina
2019-10-11 23:01:00	2019-10-11 23:04:00	100	201	TRUE	2019-10-11 23:04:00	EN	Sometimes (once or twice a month)	Grocery store,Restaurant	Vaguely familiar	Very concerned	Extremely concerned	Extremely concerned	Extremely concerned	Very concerned	Extremely likely	No	1961	United States of America	Florida
2019-10-11 23:51:00	2019-10-11 23:55:00	100	187	TRUE	2019-10-11 23:55:00	EN	Often (once a week)	Grocery store,Restaurant	Never heard of it	Very concerned	Very concerned	Moderately concerned	Very concerned	Very concerned	Somewhat likely	No	1966	United States of America	North Carolina
2019-10-11 23:53:00	2019-10-11 23:55:00	100	135	TRUE	2019-10-11 23:55:00	EN	Sometimes (once or twice a month)	Seafood market,Grocery store,Restaurant	Vaguely familiar	Very concerned	Very concerned	Very concerned	Extremely concerned	Moderately concerned	Somewhat likely	No	1963	United States of America	California
2019-10-12 00:14:00	2019-10-12 00:16:00	100	116	TRUE	2019-10-12 00:16:00	EN	Often (once a week)	Grocery store	Never heard of it	Very concerned	Moderately concerned	Moderately concerned	Very concerned	Very concerned	Somewhat likely	Yes	1996	United States of America
2019-10-12 03:17:00	2019-10-12 03:20:00	100	133	TRUE	2019-10-12 03:20:00	EN	Very often (several times per week)	Seafood market,Grocery store	Very familiar	Very concerned	Very concerned	Extremely concerned	Extremely concerned	Very concerned	Extremely likely	No	1984	United States of America	California
2019-10-12 03:38:00	2019-10-12 03:42:00	100	213	TRUE	2019-10-12 03:42:00	EN	Very often (several times per week)	Seafood market,Grocery store,Restaurant,Other	Vaguely familiar	Very concerned	Very concerned	Very concerned	Very concerned	Extremely concerned	Extremely likely	No	1946	United States of America	North Carolina
2019-10-12 06:34:00	2019-10-12 06:37:00	100	179	TRUE	2019-10-12 06:37:00	EN	Sometimes (once or twice a month)	Grocery store,Restaurant	Never heard of it	Very concerned	Extremely concerned	Extremely concerned	Extremely concerned	Very concerned	Extremely likely	No	1954	United States of America	Minnesota
2019-10-12 07:41:00	2019-10-12 07:44:00	100	164	TRUE	2019-10-12 07:44:00	EN	Sometimes (once or twice a month)	Grocery store,Restaurant,Other	Never heard of it	Very concerned	Slightly concerned	Slightly concerned	Moderately concerned	Very concerned	Somewhat likely	Yes	1973	United States of America	Minnesota
2019-10-12 08:05:00	2019-10-12 08:08:00	100	177	TRUE	2019-10-12 08:08:00	EN	Sometimes (once or twice a month)	Grocery store,Restaurant	Never heard of it	Very concerned	Very concerned	Very concerned	Extremely concerned	Very concerned	Extremely likely	No	1946	United States of America	North Carolina
2019-10-12 08:27:00	2019-10-12 08:32:00	100	294	TRUE	2019-10-12 08:32:00	EN	Sometimes (once or twice a month)	Grocery store,Restaurant	Vaguely familiar	Very concerned	Very concerned	Very concerned	Very concerned	Very concerned	Extremely unlikely	No	1939	United States of America	North Carolina
2019-10-12 10:24:00	2019-10-12 10:26:00	100	108	TRUE	2019-10-12 10:26:00	EN	Sometimes (once or twice a month)	Seafood market,Restaurant	Vaguely familiar	Very concerned	Very concerned	Moderately concerned	Very concerned	Very concerned	Extremely likely	No	1973	United States of America	New Jersey
2019-10-12 10:59:00	2019-10-12 11:03:00	100	183	TRUE	2019-10-12 11:03:00	EN	Often (once a week)	Grocery store	Vaguely familiar	Very concerned	Extremely concerned	Extremely concerned	Extremely concerned	Extremely concerned	Somewhat unlikely	Yes	1997	United States of America	Florida
2019-10-12 12:21:00	2019-10-12 12:24:00	100	206	TRUE	2019-10-12 12:24:00	EN	Never	I do not purchase seafood	Vaguely familiar	Very concerned	Very concerned	Extremely concerned	Extremely concerned	Very concerned	Somewhat likely	No	1957	United States of America	North Carolina
2019-10-12 12:22:00	2019-10-12 12:25:00	100	143	TRUE	2019-10-12 12:25:00	EN	Often (once a week)	Grocery store	Never heard of it	Very concerned	Moderately concerned	Extremely concerned	Extremely concerned	Very concerned	Extremely likely	No	1963	United States of America	Florida
2019-10-12 12:55:00	2019-10-12 12:57:00	100	101	TRUE	2019-10-12 12:57:00	EN	Sometimes (once or twice a month)	Grocery store	Vaguely familiar	Very concerned	Very concerned	Very concerned	Very concerned	Very concerned	Extremely likely	No	1970	United States of America	Virginia
2019-10-12 14:12:00	2019-10-12 14:16:00	100	216	TRUE	2019-10-12 14:16:00	EN	Often (once a week)	Seafood market	Vaguely familiar	Very concerned	Very concerned	Very concerned	Very concerned	Very concerned	Neither likely nor unlikely	No	1933	United States of America	North Carolina
2019-10-12 14:40:00	2019-10-12 14:44:00	100	230	TRUE	2019-10-12 14:44:00	EN	Often (once a week)	Other	Never heard of it	Very concerned	Very concerned	Very concerned	Very concerned	Extremely concerned	Extremely likely	No	1957	United States of America	Virginia
2019-10-12 14:46:00	2019-10-12 14:50:00	100	209	TRUE	2019-10-12 14:50:00	EN	Often (once a week)	Grocery store	Vaguely familiar	Very concerned	Extremely concerned	Extremely concerned	Extremely concerned	Very concerned	Extremely likely	No	1944	United States of America	Minnesota
2019-10-12 14:57:00	2019-10-12 15:01:00	100	199	TRUE	2019-10-12 15:01:00	EN	Sometimes (once or twice a month)	Restaurant	Vaguely familiar	Very concerned	Extremely concerned	Moderately concerned	Extremely concerned	Moderately concerned	Extremely likely	Yes	1991	United States of America	Maryland
2019-10-12 16:04:00	2019-10-12 16:06:00	100	158	TRUE	2019-10-12 16:06:00	EN	Often (once a week)	Grocery store,Restaurant	Vaguely familiar	Very concerned	Very concerned	Extremely concerned	Extremely concerned	Extremely concerned	Extremely likely	No	1952	United States of America	North Carolina
2019-10-12 16:32:00	2019-10-12 16:34:00	100	148	TRUE	2019-10-12 16:34:00	EN	Sometimes (once or twice a month)	Restaurant	Vaguely familiar	Very concerned	Extremely concerned	Extremely concerned	Extremely concerned	Moderately concerned	Somewhat likely	Yes	2000	United States of America	North Carolina
2019-10-12 16:53:00	2019-10-12 16:56:00	100	171	TRUE	2019-10-12 16:56:00	EN	Often (once a week)	Seafood market,Restaurant,Other	Vaguely familiar	Very concerned	Extremely concerned	Extremely concerned	Extremely concerned	Extremely concerned	Extremely likely	No	1973	United States of America	Florida
2019-10-12 17:01:00	2019-10-12 17:04:00	100	160	TRUE	2019-10-12 17:04:00	EN	Sometimes (once or twice a month)	Grocery store,Restaurant	Vaguely familiar	Very concerned	Very concerned	Very concerned	Extremely concerned	Very concerned	Extremely likely	No	1958	United States of America	North Carolina
2019-10-12 17:11:00	2019-10-12 17:13:00	100	123	TRUE	2019-10-12 17:13:00	EN	Very often (several times per week)	Seafood market,Grocery store,Restaurant	Vaguely familiar	Very concerned	Very concerned	Slightly concerned	Very concerned	Not at all concerned	Somewhat likely	Yes	1994	United States of America	Virginia
2019-10-12 18:04:00	2019-10-12 18:06:00	100	155	TRUE	2019-10-12 18:06:00	EN	Often (once a week)	Grocery store,Restaurant	Vaguely familiar	Very concerned	Moderately concerned	Extremely concerned	Extremely concerned	Very concerned	Somewhat likely	No	1958	United States of America	Ohio
2019-10-12 19:03:00	2019-10-12 19:09:00	100	317	TRUE	2019-10-12 19:09:00	EN	Seldom (once or twice a year)	Grocery store,Restaurant	Never heard of it	Very concerned	Extremely concerned	Not at all concerned	Slightly concerned	Moderately concerned	Extremely likely	Yes	1999	United States of America	North Carolina
2019-10-12 19:15:00	2019-10-12 19:18:00	100	172	TRUE	2019-10-12 19:18:00	EN	Often (once a week)	Restaurant	Vaguely familiar	Very concerned	Very concerned	Moderately concerned	Moderately concerned	Very concerned	Extremely likely	No	1968	United States of America	North Carolina
2019-10-12 20:21:00	2019-10-12 20:23:00	100	159	TRUE	2019-10-12 20:23:00	EN	Seldom (once or twice a year)	Grocery store	Never heard of it	Very concerned	Very concerned	Very concerned	Very concerned	Very concerned	Somewhat likely	No	1970	United States of America	Wisconsin
2019-10-12 20:39:00	2019-10-12 20:41:00	100	104	TRUE	2019-10-12 20:41:00	EN	Sometimes (once or twice a month)	Grocery store	Never heard of it	Very concerned	Extremely concerned	Very concerned	Very concerned	Extremely concerned	Somewhat likely	No	1986	United States of America	New Jersey
2019-10-12 21:57:00	2019-10-12 21:59:00	100	138	TRUE	2019-10-12 21:59:00	EN	Sometimes (once or twice a month)	Grocery store,Restaurant,Other	Vaguely familiar	Very concerned	Very concerned	Slightly concerned	Very concerned	Moderately concerned	Extremely likely	No	1989	United States of America	North Carolina
2019-10-12 22:25:00	2019-10-12 22:27:00	100	126	TRUE	2019-10-12 22:27:00	EN	Often (once a week)	Grocery store	Vaguely familiar	Very concerned	Very concerned	Very concerned	Very concerned	Very concerned	Somewhat likely	No	1993	United States of America	California
2019-10-13 00:29:00	2019-10-13 00:32:00	100	139	TRUE	2019-10-13 00:32:00	EN	Sometimes (once or twice a month)	Restaurant	Vaguely familiar	Very concerned	Very concerned	Very concerned	Very concerned	Very concerned	Extremely likely	No	1964	United States of America	North Carolina
2019-10-13 04:54:00	2019-10-13 04:56:00	100	166	TRUE	2019-10-13 04:56:00	EN	Sometimes (once or twice a month)	Grocery store	Never heard of it	Very concerned	Extremely concerned	Very concerned	Extremely concerned	Extremely concerned	Neither likely nor unlikely	No	1964	United States of America	North Carolina
2019-10-13 08:21:00	2019-10-13 08:23:00	100	110	TRUE	2019-10-13 08:23:00	EN	Seldom (once or twice a year)	Restaurant	Very familiar	Very concerned	Slightly concerned	Extremely concerned	Extremely concerned	Not at all concerned	Somewhat likely	Yes	1993	United States of America
2019-10-13 09:19:00	2019-10-13 09:22:00	100	172	TRUE	2019-10-13 09:22:00	EN	Seldom (once or twice a year)	Grocery store,Restaurant	Never heard of it	Very concerned	Very concerned	Moderately concerned	Very concerned	Very concerned	Somewhat likely	No	1969	United States of America	Iowa
2019-10-13 09:30:00	2019-10-13 09:43:00	100	802	TRUE	2019-10-13 09:43:00	EN	Often (once a week)	Grocery store	Vaguely familiar	Very concerned	Slightly concerned	Very concerned	Extremely concerned	Very concerned	Extremely likely	No	1964	United States of America	Virginia
2019-10-13 09:59:00	2019-10-13 10:01:00	100	142	TRUE	2019-10-13 10:01:00	EN	Sometimes (once or twice a month)	Grocery store	Never heard of it	Very concerned	Very concerned	Extremely concerned	Extremely concerned	Extremely concerned	Somewhat likely	No	1984	United States of America	New York
2019-10-13 12:26:00	2019-10-13 12:29:00	100	159	TRUE	2019-10-13 12:29:00	EN	Often (once a week)	Grocery store,Restaurant	Vaguely familiar	Very concerned	Extremely concerned	Very concerned	Very concerned	Very concerned	Extremely likely	No	1957	United States of America	Minnesota
2019-10-13 13:26:00	2019-10-13 13:27:00	100	68	TRUE	2019-10-13 13:27:00	EN	Often (once a week)	Grocery store,Restaurant	Very familiar	Very concerned	Moderately concerned	Very concerned	Extremely concerned	Moderately concerned	Extremely likely	Yes	1989	United States of America	Florida
2019-10-13 15:45:00	2019-10-13 15:47:00	100	108	TRUE	2019-10-13 15:47:00	EN	Very often (several times per week)	Seafood market,Grocery store,Restaurant	Very familiar	Very concerned	Very concerned	Extremely concerned	Extremely concerned	Moderately concerned	Extremely likely	No	1954	United States of America	North Carolina
2019-10-13 17:34:00	2019-10-13 17:35:00	100	118	TRUE	2019-10-13 17:35:00	EN	Sometimes (once or twice a month)	Grocery store	Vaguely familiar	Very concerned	Not at all concerned	Very concerned	Very concerned	Very concerned	Extremely likely	No	1959	United States of America	North Carolina
2019-10-13 19:41:00	2019-10-13 19:44:00	100	147	TRUE	2019-10-13 19:44:00	EN	Sometimes (once or twice a month)	Seafood market,Grocery store,Restaurant	Never heard of it	Very concerned	Slightly concerned	Very concerned	Extremely concerned	Very concerned	Somewhat likely	No	1992	United States of America	Maryland
2019-10-13 19:59:00	2019-10-13 20:03:00	100	220	TRUE	2019-10-13 20:03:00	EN	Often (once a week)	Grocery store,Restaurant	Never heard of it	Very concerned	Very concerned	Not at all concerned	Very concerned	Extremely concerned	Somewhat likely	Yes	1990	United States of America	Florida
2019-10-13 21:16:00	2019-10-13 21:26:00	100	590	TRUE	2019-10-13 21:26:00	EN	Sometimes (once or twice a month)	Restaurant	Vaguely familiar	Very concerned	Very concerned	Very concerned	Very concerned	Very concerned	Extremely likely	No	1965	United States of America	Connecticut
2019-10-13 21:52:00	2019-10-13 21:55:00	100	128	TRUE	2019-10-13 21:55:00	EN	Seldom (once or twice a year)	Grocery store,Restaurant	Vaguely familiar	Very concerned	Extremely concerned	Not at all concerned	Very concerned	Very concerned	Extremely likely	No	1968	United States of America	Wisconsin
2019-10-13 23:28:00	2019-10-13 23:29:00	100	113	TRUE	2019-10-13 23:29:00	EN	Sometimes (once or twice a month)	Grocery store	Vaguely familiar	Very concerned	Slightly concerned	Very concerned	Extremely concerned	Moderately concerned	Somewhat likely	No	1977	United States of America	Maine
2019-10-14 07:37:00	2019-10-14 07:39:00	100	155	TRUE	2019-10-14 07:39:00	EN	Often (once a week)	Grocery store	Vaguely familiar	Very concerned	Very concerned	Extremely concerned	Extremely concerned	Moderately concerned	Somewhat likely	No	1958	United States of America	New York
2019-10-14 08:47:00	2019-10-14 08:50:00	100	148	TRUE	2019-10-14 08:50:00	EN	Often (once a week)	Restaurant	Vaguely familiar	Very concerned	Very concerned	Moderately concerned	Very concerned	Very concerned	Somewhat likely	No	1964	United States of America	North Carolina
2019-10-14 08:53:00	2019-10-14 08:55:00	100	128	TRUE	2019-10-14 08:55:00	EN	Often (once a week)	Seafood market,Grocery store,Restaurant	Vaguely familiar	Very concerned	Extremely concerned	Very concerned	Extremely concerned	Very concerned	Extremely likely	No	1963	United States of America	North Carolina
2019-10-14 10:12:00	2019-10-14 10:14:00	100	86	TRUE	2019-10-14 10:14:00	EN	Often (once a week)	Grocery store,Restaurant	Very familiar	Very concerned	Moderately concerned	Moderately concerned	Extremely concerned	Very concerned	Neither likely nor unlikely	No	1976	Mexico
2019-10-14 11:00:00	2019-10-14 11:04:00	100	242	TRUE	2019-10-14 11:04:00	EN	Often (once a week)	Grocery store	Vaguely familiar	Very concerned	Moderately concerned	Extremely concerned	Extremely concerned	Very concerned	Extremely likely	No	1980	United States of America	Maryland
2019-10-14 11:07:00	2019-10-14 11:08:00	100	79	TRUE	2019-10-14 11:08:00	EN	Sometimes (once or twice a month)	Restaurant	Never heard of it	Very concerned	Extremely concerned	Extremely concerned	Extremely concerned	Extremely concerned	Extremely likely	No	1976	United States of America	North Carolina
2019-10-14 12:45:00	2019-10-14 12:47:00	100	109	TRUE	2019-10-14 12:47:00	EN	Often (once a week)	Grocery store,Restaurant	Vaguely familiar	Very concerned	Not at all concerned	Extremely concerned	Extremely concerned	Slightly concerned	Extremely likely	No	1984	Denmark
2019-10-14 13:30:00	2019-10-14 13:34:00	100	245	TRUE	2019-10-14 13:34:00	EN	Sometimes (once or twice a month)	Grocery store	Vaguely familiar	Very concerned	Very concerned	Very concerned	Very concerned	Very concerned	Somewhat likely	No	1967	United States of America	South Carolina
2019-10-14 13:20:00	2019-10-14 13:36:00	100	982	TRUE	2019-10-14 13:36:00	EN	Never	I do not purchase seafood	Vaguely familiar	Very concerned	Moderately concerned	Very concerned	Extremely concerned	Very concerned	Somewhat likely	Yes	2000	United States of America	North Carolina
2019-10-14 13:26:00	2019-10-14 13:38:00	100	740	TRUE	2019-10-14 13:38:00	EN	Often (once a week)	Seafood market,Restaurant,Other	Very familiar	Very concerned	Moderately concerned	Moderately concerned	Extremely concerned	Extremely concerned	Extremely likely	No	1983	United States of America	Georgia
2019-10-14 13:40:00	2019-10-14 13:41:00	100	103	TRUE	2019-10-14 13:41:00	EN	Often (once a week)	Grocery store,Restaurant	Never heard of it	Very concerned	Very concerned	Moderately concerned	Moderately concerned	Very concerned	Neither likely nor unlikely	No	1999	United States of America	North Carolina
2019-10-14 13:55:00	2019-10-14 13:56:00	100	71	TRUE	2019-10-14 13:56:00	EN	Seldom (once or twice a year)	Restaurant	Vaguely familiar	Very concerned	Extremely concerned	Moderately concerned	Extremely concerned	Very concerned	Somewhat likely	Yes	1998	United States of America	North Carolina
2019-10-14 14:02:00	2019-10-14 14:04:00	100	160	TRUE	2019-10-14 14:04:00	EN	Sometimes (once or twice a month)	Grocery store	Vaguely familiar	Very concerned	Very concerned	Moderately concerned	Extremely concerned	Extremely concerned	Somewhat likely	No	1962	United States of America	North Carolina
2019-10-14 14:10:00	2019-10-14 14:11:00	100	90	TRUE	2019-10-14 14:11:00	EN	Never	Seafood market	Never heard of it	Very concerned	Moderately concerned	Very concerned	Extremely concerned	Extremely concerned	Neither likely nor unlikely	No	1973	United States of America	Georgia
2019-10-14 14:13:00	2019-10-14 14:15:00	100	127	TRUE	2019-10-14 14:15:00	EN	Seldom (once or twice a year)	Seafood market,Restaurant	Very familiar	Very concerned	Moderately concerned	Very concerned	Extremely concerned	Very concerned	Extremely likely	No	1960	United States of America	North Carolina
2019-10-14 14:14:00	2019-10-14 14:16:00	100	135	TRUE	2019-10-14 14:16:00	EN	Sometimes (once or twice a month)	Seafood market,Grocery store,Restaurant	Vaguely familiar	Very concerned	Extremely concerned	Extremely concerned	Extremely concerned	Extremely concerned	Neither likely nor unlikely	Yes	2000	United States of America	North Carolina
2019-10-14 14:22:00	2019-10-14 14:24:00	100	118	TRUE	2019-10-14 14:24:00	EN	Often (once a week)	Grocery store,Restaurant	Vaguely familiar	Very concerned	Moderately concerned	Very concerned	Extremely concerned	Very concerned	Extremely likely	Yes	2001	United States of America	Georgia
2019-10-14 14:36:00	2019-10-14 14:39:00	100	148	TRUE	2019-10-14 14:39:00	EN	Sometimes (once or twice a month)	Grocery store,Restaurant	Very familiar	Very concerned	Extremely concerned	Very concerned	Very concerned	Moderately concerned	Extremely likely	No	1989	United States of America	North Carolina
2019-10-14 14:36:00	2019-10-14 14:40:00	100	199	TRUE	2019-10-14 14:40:00	EN	Often (once a week)	Seafood market,Grocery store,Restaurant	Very familiar	Very concerned	Moderately concerned	Very concerned	Extremely concerned	Moderately concerned	Neither likely nor unlikely	Yes	1999	United States of America	Georgia
2019-10-14 14:45:00	2019-10-14 14:48:00	100	174	TRUE	2019-10-14 14:48:00	EN	Sometimes (once or twice a month)	Grocery store	Vaguely familiar	Very concerned	Extremely concerned	Not at all concerned	Extremely concerned	Slightly concerned	Somewhat likely	Yes	2001	United States of America	North Carolina
2019-10-14 15:08:00	2019-10-14 15:10:00	100	114	TRUE	2019-10-14 15:10:00	EN	Never	I do not purchase seafood	Vaguely familiar	Very concerned	Very concerned	Moderately concerned	Moderately concerned	Moderately concerned	Neither likely nor unlikely	Yes	2001	United States of America	North Carolina
2019-10-14 15:32:00	2019-10-14 15:34:00	100	130	TRUE	2019-10-14 15:34:00	EN	Sometimes (once or twice a month)	Grocery store,Restaurant	Vaguely familiar	Very concerned	Extremely concerned	Very concerned	Very concerned	Very concerned	Neither likely nor unlikely	No	1952	United States of America	Pennsylvania
2019-10-14 15:54:00	2019-10-14 15:57:00	100	175	TRUE	2019-10-14 15:57:00	EN	Sometimes (once or twice a month)	Restaurant	Vaguely familiar	Very concerned	Very concerned	Extremely concerned	Extremely concerned	Very concerned	Neither likely nor unlikely	Yes	1995	United States of America	Georgia
2019-10-14 16:17:00	2019-10-14 16:19:00	100	110	TRUE	2019-10-14 16:19:00	EN	Often (once a week)	Grocery store,Restaurant	Vaguely familiar	Very concerned	Extremely concerned	Very concerned	Extremely concerned	Extremely concerned	Somewhat unlikely	Yes	1997	United States of America	North Carolina
2019-10-14 16:42:00	2019-10-14 16:44:00	100	131	TRUE	2019-10-14 16:44:00	EN	Very often (several times per week)	Restaurant	Never heard of it	Very concerned	Not at all concerned	Slightly concerned	Extremely concerned	Extremely concerned	Neither likely nor unlikely	Yes	2000	United States of America	North Carolina
2019-10-14 16:55:00	2019-10-14 16:57:00	100	125	TRUE	2019-10-14 16:57:00	EN	Sometimes (once or twice a month)	Seafood market,Grocery store,Restaurant	Vaguely familiar	Very concerned	Extremely concerned	Moderately concerned	Moderately concerned	Very concerned	Somewhat likely	Yes	2001	United States of America	North Carolina
2019-10-14 16:56:00	2019-10-14 16:59:00	100	176	TRUE	2019-10-14 16:59:00	EN	Never	I do not purchase seafood	Vaguely familiar	Very concerned	Very concerned	Extremely concerned	Extremely concerned	Slightly concerned	Neither likely nor unlikely	Yes	2001	United States of America	Georgia
2019-10-14 17:32:00	2019-10-14 17:33:00	100	86	TRUE	2019-10-14 17:33:00	EN	Very often (several times per week)	Seafood market,Other	Very familiar	Very concerned	Very concerned	Moderately concerned	Very concerned	Extremely concerned	Extremely likely	Yes	1999	United States of America	North Carolina
2019-10-14 18:07:00	2019-10-14 18:08:00	100	86	TRUE	2019-10-14 18:08:00	EN	Sometimes (once or twice a month)	Grocery store,Restaurant	Vaguely familiar	Very concerned	Very concerned	Moderately concerned	Very concerned	Very concerned	Somewhat likely	No	1992	United States of America	Massachusetts
2019-10-14 19:13:00	2019-10-14 19:14:00	100	72	TRUE	2019-10-14 19:14:00	EN	Seldom (once or twice a year)	Seafood market	Vaguely familiar	Very concerned	Very concerned	Very concerned	Extremely concerned	Extremely concerned	Somewhat likely	Yes	1998	United States of America	North Carolina
2019-10-14 19:49:00	2019-10-14 19:51:00	100	156	TRUE	2019-10-14 19:51:00	EN	Often (once a week)	Grocery store	Vaguely familiar	Very concerned	Very concerned	Very concerned	Very concerned	Very concerned	Extremely likely	No	1956	United States of America
2019-10-14 19:49:00	2019-10-14 19:52:00	100	207	TRUE	2019-10-14 19:52:00	EN	Often (once a week)	Grocery store	Vaguely familiar	Very concerned	Very concerned	Very concerned	Extremely concerned	Very concerned	Extremely likely	No	1956-09-09	United States of America	California
2019-10-14 20:07:00	2019-10-14 20:10:00	100	127	TRUE	2019-10-14 20:10:00	EN	Sometimes (once or twice a month)	Grocery store	Vaguely familiar	Very concerned	Very concerned	Extremely concerned	Extremely concerned	Very concerned	Extremely likely	Yes	1967	United States of America	North Carolina
2019-10-14 20:23:00	2019-10-14 20:25:00	100	79	TRUE	2019-10-14 20:25:00	EN	Often (once a week)	Grocery store,Restaurant	Very familiar	Very concerned	Very concerned	Moderately concerned	Very concerned	Moderately concerned	Extremely likely	No	1992	United States of America	New Jersey
2019-10-14 20:54:00	2019-10-14 20:56:00	100	139	TRUE	2019-10-14 20:56:00	EN	Seldom (once or twice a year)	Grocery store,Restaurant	Vaguely familiar	Very concerned	Very concerned	Very concerned	Very concerned	Very concerned	Extremely likely	No	1962	United States of America	Pennsylvania
2019-10-14 21:20:00	2019-10-14 21:22:00	100	100	TRUE	2019-10-14 21:22:00	EN	Often (once a week)	Grocery store	Vaguely familiar	Very concerned	Very concerned	Very concerned	Extremely concerned	Very concerned	Extremely likely	Yes	1997	United States of America	North Carolina
2019-10-14 21:59:00	2019-10-14 22:02:00	100	197	TRUE	2019-10-14 22:02:00	EN	Often (once a week)	Grocery store,Restaurant	Very familiar	Very concerned	Very concerned	Moderately concerned	Very concerned	Moderately concerned	Extremely likely	Yes	1998	United States of America	North Carolina
2019-10-14 22:13:00	2019-10-14 22:15:00	100	114	TRUE	2019-10-14 22:15:00	EN	Sometimes (once or twice a month)	Grocery store,Restaurant	Vaguely familiar	Very concerned	Extremely concerned	Extremely concerned	Extremely concerned	Extremely concerned	Somewhat likely	Yes	2000	United States of America	North Carolina
2019-10-14 23:05:00	2019-10-14 23:07:00	100	135	TRUE	2019-10-14 23:07:00	EN	Sometimes (once or twice a month)	Restaurant	Never heard of it	Very concerned	Moderately concerned	Very concerned	Extremely concerned	Extremely concerned	Somewhat unlikely	Yes	1998	United States of America	North Carolina
2019-10-14 23:06:00	2019-10-14 23:12:00	100	342	TRUE	2019-10-14 23:12:00	EN	Sometimes (once or twice a month)	Restaurant	Never heard of it	Very concerned	Extremely concerned	Extremely concerned	Extremely concerned	Extremely concerned	Extremely likely	No	1968	United States of America	California
2019-10-15 01:11:00	2019-10-15 01:13:00	100	156	TRUE	2019-10-15 01:13:00	EN	Sometimes (once or twice a month)	Grocery store	Vaguely familiar	Very concerned	Slightly concerned	Very concerned	Extremely concerned	Very concerned	Extremely likely	No	1969	United States of America	Georgia
2019-10-15 07:32:00	2019-10-15 07:34:00	100	119	TRUE	2019-10-15 07:34:00	EN	Sometimes (once or twice a month)	Grocery store	Never heard of it	Very concerned	Very concerned	Very concerned	Very concerned	Moderately concerned	Neither likely nor unlikely	No	1969	United States of America	North Carolina
2019-10-15 07:57:00	2019-10-15 07:59:00	100	107	TRUE	2019-10-15 07:59:00	EN	Very often (several times per week)	Grocery store	Vaguely familiar	Very concerned	Extremely concerned	Extremely concerned	Extremely concerned	Extremely concerned	Extremely likely	No	1972	United States of America	Pennsylvania
2019-10-15 08:02:00	2019-10-15 08:04:00	100	134	TRUE	2019-10-15 08:04:00	EN	Sometimes (once or twice a month)	Grocery store	Never heard of it	Very concerned	Very concerned	Very concerned	Very concerned	Very concerned	Somewhat likely	No	1976	United States of America	Minnesota
2019-10-15 09:52:00	2019-10-15 11:00:00	100	4078	TRUE	2019-10-15 11:00:00	EN	Sometimes (once or twice a month)	Grocery store,Restaurant	Very familiar	Very concerned	Slightly concerned	Extremely concerned	Extremely concerned	Moderately concerned	Somewhat likely	No	1980	United States of America	District of Columbia
2019-10-15 12:03:00	2019-10-15 12:06:00	100	182	TRUE	2019-10-15 12:06:00	EN	Often (once a week)	Seafood market,Grocery store,Restaurant	Vaguely familiar	Very concerned	Moderately concerned	Slightly concerned	Extremely concerned	Moderately concerned	Somewhat likely	No	1990	United States of America	Georgia
2019-10-15 13:16:00	2019-10-15 13:18:00	100	117	TRUE	2019-10-15 13:18:00	EN	Never	I do not purchase seafood	Very familiar	Very concerned	Extremely concerned	Extremely concerned	Extremely concerned	Not at all concerned	Somewhat unlikely	No	1983	United States of America	Virginia
2019-10-15 19:30:00	2019-10-15 19:34:00	100	194	TRUE	2019-10-15 19:34:00	EN	Sometimes (once or twice a month)	Grocery store	Never heard of it	Very concerned	Extremely concerned	Extremely concerned	Extremely concerned	Extremely concerned	Extremely likely	No	1964	United States of America	Maryland
2019-10-15 19:53:00	2019-10-15 19:58:00	100	290	TRUE	2019-10-15 19:58:00	EN	Often (once a week)	Grocery store,Restaurant	Never heard of it	Very concerned	Very concerned	Moderately concerned	Very concerned	Very concerned	Somewhat likely	No	1946	United States of America	Michigan
2019-10-15 21:13:00	2019-10-15 21:15:00	100	158	TRUE	2019-10-15 21:15:00	EN	Seldom (once or twice a year)	Grocery store	Never heard of it	Very concerned	Very concerned	Very concerned	Very concerned	Very concerned	Extremely likely	No	1961	United States of America	North Carolina
2019-10-16 08:18:00	2019-10-16 08:20:00	100	153	TRUE	2019-10-16 08:20:00	EN	Seldom (once or twice a year)	Restaurant	Vaguely familiar	Very concerned	Very concerned	Extremely concerned	Extremely concerned	Slightly concerned	Extremely likely	No	1978	United States of America	Massachusetts
2019-10-16 08:28:00	2019-10-16 08:30:00	100	125	TRUE	2019-10-16 08:30:00	EN	Sometimes (once or twice a month)	Grocery store	Never heard of it	Very concerned	Extremely concerned	Moderately concerned	Moderately concerned	Very concerned	Somewhat likely	No	1984	United States of America	Texas
2019-10-16 08:51:00	2019-10-16 08:54:00	100	175	TRUE	2019-10-16 08:54:00	EN	Sometimes (once or twice a month)	Grocery store	Never heard of it	Very concerned	Slightly concerned	Slightly concerned	Slightly concerned	Moderately concerned	Neither likely nor unlikely	No	1964	United States of America	North Carolina
2019-10-16 13:04:00	2019-10-16 13:08:00	100	238	TRUE	2019-10-16 13:08:00	EN	Often (once a week)	Other	Vaguely familiar	Very concerned	Not at all concerned	Very concerned	Very concerned	Very concerned	Extremely likely	No	1969	United States of America	North Carolina
2019-10-16 14:41:00	2019-10-16 14:43:00	100	132	TRUE	2019-10-16 14:43:00	EN	Very often (several times per week)	Seafood market,Grocery store	Vaguely familiar	Very concerned	Moderately concerned	Very concerned	Very concerned	Very concerned	Extremely likely	No	1966	United States of America	North Carolina
2019-10-16 20:02:00	2019-10-16 20:04:00	100	149	TRUE	2019-10-16 20:04:00	EN	Very often (several times per week)	Restaurant,Other	Never heard of it	Very concerned	Extremely concerned	Very concerned	Extremely concerned	Very concerned	Extremely likely	No	1961	United States of America	Massachusetts
2019-10-16 20:06:00	2019-10-16 20:07:00	100	96	TRUE	2019-10-16 20:07:00	EN	Often (once a week)	Grocery store	Vaguely familiar	Very concerned	Moderately concerned	Moderately concerned	Extremely concerned	Moderately concerned	Somewhat likely	No	1983	United States of America	California
2019-10-16 21:56:00	2019-10-16 21:58:00	100	152	TRUE	2019-10-16 21:58:00	EN	Often (once a week)	Grocery store,Restaurant,Other	Vaguely familiar	Very concerned	Very concerned	Very concerned	Very concerned	Moderately concerned	Neither likely nor unlikely	Yes	2001	United States of America	North Carolina
2019-10-16 23:02:00	2019-10-16 23:07:00	100	313	TRUE	2019-10-16 23:07:00	EN	Often (once a week)	Seafood market	Never heard of it	Very concerned	Very concerned	Moderately concerned	Very concerned	Very concerned	Neither likely nor unlikely	No	1958	United States of America	Rhode Island
2019-10-16 23:12:00	2019-10-16 23:15:00	100	186	TRUE	2019-10-16 23:15:00	EN	Very often (several times per week)	Seafood market,Restaurant	Vaguely familiar	Very concerned	Slightly concerned	Slightly concerned	Extremely concerned	Extremely concerned	Extremely likely	Yes	1982	United States of America	Georgia
2019-10-16 23:25:00	2019-10-16 23:35:00	100	595	TRUE	2019-10-16 23:35:00	EN	Often (once a week)	Seafood market,Grocery store,Restaurant	Vaguely familiar	Very concerned	Not at all concerned	Extremely concerned	Extremely concerned	Very concerned	Somewhat likely	Yes	2001	United States of America	North Carolina
2019-10-17 07:16:00	2019-10-17 07:19:00	100	131	TRUE	2019-10-17 07:19:00	EN	Often (once a week)	Grocery store	Vaguely familiar	Very concerned	Extremely concerned	Very concerned	Very concerned	Very concerned	Extremely likely	No	1989	United States of America	North Carolina
2019-10-19 10:47:00	2019-10-19 10:50:00	100	152	TRUE	2019-10-19 10:50:00	EN	Very often (several times per week)	Grocery store	Vaguely familiar	Very concerned	Moderately concerned	Moderately concerned	Very concerned	Very concerned	Neither likely nor unlikely	No	1941	United States of America	North Carolina
2019-10-19 10:55:00	2019-10-19 10:58:00	100	150	TRUE	2019-10-19 10:58:00	EN	Often (once a week)	Grocery store	Vaguely familiar	Very concerned	Very concerned	Very concerned	Very concerned	Very concerned	Somewhat likely	No	1956	United States of America	North Carolina
2019-10-19 12:05:00	2019-10-19 12:07:00	100	115	TRUE	2019-10-19 12:07:00	EN	Often (once a week)	Grocery store,Restaurant	Vaguely familiar	Very concerned	Very concerned	Extremely concerned	Very concerned	Extremely concerned	Somewhat likely	No	1974	United States of America	North Carolina
2019-10-19 13:21:00	2019-10-19 13:25:00	100	237	TRUE	2019-10-19 13:25:00	EN	Very often (several times per week)	Grocery store	Vaguely familiar	Very concerned	Extremely concerned	Extremely concerned	Extremely concerned	Very concerned	Extremely likely	No	1950	United States of America	North Carolina
2019-10-19 14:09:00	2019-10-19 14:10:00	100	83	TRUE	2019-10-19 14:10:00	EN	Often (once a week)	Seafood market,Grocery store,Restaurant	Vaguely familiar	Very concerned	Extremely concerned	Very concerned	Extremely concerned	Moderately concerned	Extremely likely	No	1972	United States of America	North Carolina
2019-10-19 14:58:00	2019-10-19 15:01:00	100	159	TRUE	2019-10-19 15:01:00	EN	Sometimes (once or twice a month)	Grocery store,Restaurant	Vaguely familiar	Very concerned	Very concerned	Very concerned	Very concerned	Slightly concerned	Extremely likely	No	1982	United States of America	Colorado
2019-10-19 15:22:00	2019-10-19 15:28:00	100	351	TRUE	2019-10-19 15:28:00	EN	Often (once a week)	Grocery store	Vaguely familiar	Very concerned	Extremely concerned	Very concerned	Extremely concerned	Very concerned	Extremely likely	No	1960	United States of America	North Carolina
2019-10-19 15:32:00	2019-10-19 15:34:00	100	108	TRUE	2019-10-19 15:34:00	EN	Often (once a week)	Seafood market,Grocery store	Vaguely familiar	Very concerned	Extremely concerned	Extremely concerned	Extremely concerned	Very concerned	Extremely likely	No	1965	United States of America	North Carolina
2019-10-19 17:32:00	2019-10-19 17:34:00	100	124	TRUE	2019-10-19 17:34:00	EN	Sometimes (once or twice a month)	Grocery store,Restaurant	Very familiar	Very concerned	Very concerned	Moderately concerned	Extremely concerned	Very concerned	Extremely likely	No	1977	United States of America	North Carolina
2019-10-20 06:21:00	2019-10-20 06:25:00	100	222	TRUE	2019-10-20 06:25:00	EN	Sometimes (once or twice a month)	Other	Never heard of it	Very concerned	Very concerned	Very concerned	Extremely concerned	Very concerned	Extremely likely	No	1954	United States of America	North Carolina
2019-10-20 07:28:00	2019-10-20 07:31:00	100	205	TRUE	2019-10-20 07:31:00	EN	Often (once a week)	Seafood market,Grocery store,Restaurant	Never heard of it	Very concerned	Slightly concerned	Moderately concerned	Very concerned	Very concerned	Extremely likely	No	1968	United States of America	North Carolina
2019-10-20 11:00:00	2019-10-20 11:02:00	100	133	TRUE	2019-10-20 11:02:00	EN	Often (once a week)	Grocery store,Restaurant	Vaguely familiar	Very concerned	Moderately concerned	Extremely concerned	Extremely concerned	Slightly concerned	Somewhat likely	No	1962	United States of America	North Carolina
2019-10-20 13:14:00	2019-10-20 13:17:00	100	152	TRUE	2019-10-20 13:17:00	EN	Seldom (once or twice a year)	Restaurant	Vaguely familiar	Very concerned	Moderately concerned	Slightly concerned	Moderately concerned	Moderately concerned	Somewhat likely	No	1967	United States of America	New York
2019-10-22 20:10:00	2019-10-22 20:14:00	100	226	TRUE	2019-10-22 20:14:00	EN	Very often (several times per week)	Seafood market,Grocery store,Restaurant	Very familiar	Very concerned	Moderately concerned	Very concerned	Very concerned	Moderately concerned	Extremely likely	No	1982	United States of America	Pennsylvania
2019-10-22 20:16:00	2019-10-22 20:19:00	100	168	TRUE	2019-10-22 20:19:00	EN	Sometimes (once or twice a month)	Restaurant	Vaguely familiar	Very concerned	Extremely concerned	Extremely concerned	Extremely concerned	Extremely concerned	Extremely likely	No	1966	United States of America	North Carolina
2019-10-22 21:05:00	2019-10-22 21:08:00	100	191	TRUE	2019-10-22 21:08:00	EN	Very often (several times per week)	Grocery store	Vaguely familiar	Very concerned	Moderately concerned	Very concerned	Very concerned	Moderately concerned	Extremely likely	No	1955	United States of America	New Jersey
2019-10-22 21:25:00	2019-10-22 21:27:00	100	141	TRUE	2019-10-22 21:27:00	EN	Never	I do not purchase seafood	Vaguely familiar	Very concerned	Very concerned	Extremely concerned	Extremely concerned	Moderately concerned	Extremely unlikely	No	1985	United States of America	North Carolina
2019-10-23 06:41:00	2019-10-23 06:46:00	100	285	TRUE	2019-10-23 06:46:00	EN	Sometimes (once or twice a month)	Grocery store,Restaurant	Never heard of it	Very concerned	Very concerned	Very concerned	Very concerned	Extremely concerned	Somewhat likely	No	1968-11-22	United States of America	New York
2019-10-23 10:54:00	2019-10-23 10:59:00	100	331	TRUE	2019-10-23 10:59:00	EN	Often (once a week)	Seafood market,Grocery store,Restaurant	Vaguely familiar	Very concerned	Very concerned	Moderately concerned	Very concerned	Very concerned	Extremely likely	No	1952-06-13	United States of America	New Jersey
2019-10-24 13:33:00	2019-10-24 13:34:00	100	105	TRUE	2019-10-24 13:34:00	EN	Sometimes (once or twice a month)	Restaurant	Never heard of it	Very concerned	Extremely concerned	Extremely concerned	Extremely concerned	Extremely concerned	Somewhat unlikely	No	1960	United States of America	Alabama
2019-10-24 13:46:00	2019-10-24 13:49:00	100	148	TRUE	2019-10-24 13:49:00	EN	Sometimes (once or twice a month)	Seafood market	Vaguely familiar	Very concerned	Extremely concerned	Moderately concerned	Extremely concerned	Extremely concerned	Somewhat likely	Yes	2000	United States of America	North Carolina
2019-10-24 14:04:00	2019-10-24 14:26:00	100	1373	TRUE	2019-10-24 14:26:00	EN	Sometimes (once or twice a month)	Seafood market,Restaurant,Other	Never heard of it	Very concerned	Very concerned	Very concerned	Very concerned	Very concerned	Somewhat unlikely	Yes	2000	United States of America	North Carolina
2019-10-24 14:30:00	2019-10-24 14:31:00	100	94	TRUE	2019-10-24 14:31:00	EN	Never	I do not purchase seafood	Very familiar	Very concerned	Extremely concerned	Extremely concerned	Extremely concerned	Extremely concerned	Extremely unlikely	No	1997	United States of America	North Carolina
2019-10-24 18:45:00	2019-10-24 18:47:00	100	150	TRUE	2019-10-24 18:47:00	EN	Often (once a week)	Restaurant	Vaguely familiar	Very concerned	Extremely concerned	Slightly concerned	Extremely concerned	Extremely concerned	Extremely likely	No	1977	United States of America	North Carolina
2019-11-01 00:11:00	2019-11-01 00:12:00	100	95	TRUE	2019-11-01 00:12:00	EN	Sometimes (once or twice a month)	Restaurant	Very familiar	Very concerned	Not at all concerned	Very concerned	Very concerned	Slightly concerned	Somewhat likely	Yes	1999	United States of America	North Carolina
2019-11-13 23:20:00	2019-11-13 23:24:00	100	244	TRUE	2019-11-13 23:24:00	EN	Very often (several times per week)	Grocery store	Never heard of it	Very concerned	Very concerned	Very concerned	Very concerned	Extremely concerned	Somewhat likely	No	1972	United States of America	North Carolina
2019-12-24 07:11:00	2019-12-24 07:14:00	100	159	TRUE	2019-12-24 07:14:00	EN	Very often (several times per week)	Grocery store	Vaguely familiar	Very concerned	Moderately concerned	Slightly concerned	Slightly concerned	Very concerned	Extremely likely	No	1965-09-14	United States of America	North Carolina
